# Supplementary material
Source: Research Square preprint supplement (doi:10.21203/rs.3.rs-8789707/v1)
Supplement: Supplementary file 2 [file 9a0cb885cb00ecffe015c44b.xlsx]

## Sheet: Index
	INDEX OF SUPPLEMENTARY TABLES
Supplementary Table	Title
ST1	Supplementary Table 1. Demographics, clinical characteristics and genotypic information of the cohorts included in the study
ST2	Supplementary Table 2. Genome-wide significant variants in the sample weigthed fixed-effects meta-analysis using METAL
ST3	Supplementary Table 3. Conditional independent variants in the sample weigthed fixed-effects meta-analysis using METAL
ST4	Supplementary Table 4. Potential causal variants identifed using statistical fine-mapping with susieR
ST5	Supplementary Table 5. Association of the ADH loci in the Metabolic Syndrome Cohort in Mexico
ST6	Supplementary Table 6. Genome-wide significant variants in the MTAG meta-analysis
ST7	Supplementary Table 7. Conditional independent variants in the MTAG meta-analysis
ST8	Supplementary Table 8. Aditional genome-wide significant variants identified in the MTAG meta-analysis but not in the METAL
ST9	Supplementary Table 9. Ancestry-specific allelic frequency of the independent variants that pass our strict quality filtering
ST10	Supplementary Table 10. Bonferroni adjusted associated genes for the alcohol consumption using MAGMA
ST11	Supplementary Table 11. Bonferroni adjusted associated genes for the alcohol consumption using H-MAGMA
ST12	Supplementary Table 12. Analysis of the HiC data in fetal and adult brain
ST13	Supplementary Table 13. Single-tissue eTWAS significant associations with alcohol consumption using S-PrediXcan
ST14	Supplementary Table 14. Multi-tissue eTWAS significant associations with alcohol consumption using S-MultiXScan
ST15	Supplementary Table 15. Single-tissue eTWAS significant associations with alcohol consumption using FUSION
ST16	Supplementary Table 16. Multi-tissue eTWAS significant with alcohol consumption using sCCA and ACAT
ST17	Supplementary Table 17. Single-tissue sTWAS significant associations with alcohol consumption using SPredictXcan
ST18	Supplementary Table 18. Multi-tissue sTWAS significant associations with alcohol consumption using SMultiXScan
ST19	Supplementary Table 19. PWAS significant associations with alcohol consumption using SPredictXcan
ST20	Supplementary Table 20. Single-cell associations with alcohol consumption using scPagwas
ST21	Supplementary Table 21. GO enrichment of the top correlated genes with the genetic liability of alcohol consumption using scPagwas
ST22	Supplementary Table 22. GO enrichment of the top correlated genes with the genetic liability of alcohol consumption that overlaped between the liver and amygdala using scPagwas
ST23	Supplementary Table 23. Genes removed and retained by GRIN network filtering
ST24	Supplementary Table 24. MENTOR clades for each GRIN retained alcohol consumption gene
ST25	Supplementary Table 25. Nominal genetic correlations (rg) of alcohol consumption with GWAS from the GWAS Catalog using LDSC
ST26	Supplementary Table 26. Association of PRS with drinks consumed per week in HCHS/SOL cohort built using PRSCs
ST27	Supplementary Table 27. Association of PRS with drinks consumed per week in HCHS/SOL cohort built using PRSCsx
ST28	Supplementary Table 28. Association of PRS with alcohol phenotype in three independent cohorts built using PRSCs
ST29	Supplementary Table 29. GWAS studies included in the genetic correlation analysis that include individuals of Latin American/Hispanics

## Sheet: ST1
Supplementary Table 1. Demographics, clinical characteristics and genotypic information of the cohorts included in the study
Multicountry
	Cohort	Sample Size	Cohort included in	Country of recruitment	Genotyping Array/Whole Genome Sequencing	Imputation reference panel	Alcohol Consumption Phenotype
	23andMe	279007	Meta-analysis	Across Latin America and United States	Custom Array	1000 Genomes	Drinks per week
Country Specific
	COVID19 - Puerto Rico	242	ASA	Puerto Rico	Infinium Global Diversity Array	TopMed	NA
	Baependi Heart Study	307	ASA	Brazil		TopMed	NA
	São Paulo Epidemiologic Sleep Study (EPISONO)	929	PRS	Brazil	Human Omni Express BeadChip array	TopMed	AUDIT-Q1
	Spit for Science (S4S)	950	Meta-analysis	United States	Affymetrix BioBank array	1000 Genomes	AUDIT-Q1
	El Banco por Salud	1013	PRS	United States (Self-identified from Mexico)		TopMed	AUDIT-Q1
	Boston Puerto Rican Health Study (BPRHS)	1386	Meta-analysis/ASA/PRS	United States (Self-identified from Puerto Rico)	Affymetrix Axiom Genome-Wide LAT Array	TopMed	AUDIT-Q1
	Brazilian High-Risk Cohort Study (BHRCS)	1626	Meta-analysis/ASA/PRS	Brazil	Illumina Global Screening Array	TopMed	AUDIT-Q1
	Mexican Genomic Database for Addiction Research (MxGDAR/Encodat) - Freeze 2	1731	Meta-analysis/ASA/PRS	Mexico	Infinium Global Diversity Array	TopMed	AUDIT-Q1
	Mexican Genomic Database for Addiction Research (MxGDAR/Encodat) - Freeze 1	3403	ASA/PRS	Mexico	Illumina Psych Array	TopMed	AUDIT-Q1
	The Metabolic Syndrome Cohort	5095	ADH locusc	Mexico		TopMed	Drinks per week
	The Hispanic Community Health Study/Study of Latinos (HCHS/SOL)	6076	Meta-analysis/ASAa/PRSb	United States	HumanOmni2.5-8v1-1 plus 150k custom SNPs	1000 Genomes	Drinks per week
	All of Us	10200	Meta-analysis	United States	Whole Genome Sequencing	Whole Genome Sequencing	AUDIT-Q1
	Million Veteran Program (MVP)	31877	Meta-analysis	United States	Axiom Biobank Genotyping Array	1000 Genomes	AUDIT-C
	Mexico City Prospective Study (MCPS)	140444	Meta-analysis	Mexico	Illumina Global Screening Array	TopMed	Ever/AUDIT-Q1/AUDIT-Freq
Note:
a, ASA: Ancestry-specific allelic frequency
b, PRS: Polygenic risk score
c, ADH locus: targeted association of genetic variants in the Alcohol Dehydrogenase (ADH) locus in chromosome 4

## Sheet: ST2
Supplementary Table 2. Genome-wide significant variants in the sample weigthed fixed-effects meta-analysis
Chromosome	Position (hg38)	rsID	EA	NEA	EAF	EAFse	MAF	MA	Zscore	Beta	BetaSE	P-value	Direction	N	HetISq	HetChiSq	HetDf	HetPvalue
2	27375230	rs4665972	T	C	0.3432	0.029	0.3432	T	-6.921	-0.022615	0.0032676	4.469e-12	-?--?---?	415492	0	2.13	5	0.8309
2	27412596	rs1728918	A	G	0.2514	0.0064	0.2514	A	-6.379	-0.022812	0.00357611	1.782e-10	-?-+?---?	415492	0	1.583	5	0.9033
2	27508073	rs1260326	T	C	0.3518	0.0306	0.3518	T	-7.825	-0.0245104	0.00313232	5.094e-15	---+?---?	446953	0	2.788	6	0.8349
2	27512105	rs6547692	A	G	0.6019	0.0442	0.3981	G	7.469	0.0228052	0.00305331	8.084e-14	++++?+++-	447652	9.3	7.721	7	0.3578
2	27518205	rs780096	C	G	0.4344	0.0092	0.4344	C	-6.296	-0.022909	0.00363866	3.062e-10	?--+?---+	307410	25.7	8.078	6	0.2325
2	27518238	rs780095	A	G	0.3932	0.0421	0.3932	A	-7.295	-0.0223099	0.00305825	2.981e-13	----?---+	448120	13.4	8.081	7	0.3255
2	27518370	rs780094	T	C	0.3512	0.0304	0.3512	T	-7.578	-0.0237105	0.00312886	3.523e-14	---+?---+	448294	15	8.235	7	0.3123
2	27519736	rs780093	T	C	0.3492	0.03	0.3492	T	-7.514	-0.0235416	0.00313303	5.754e-14	---+?---+	448279	0	6.733	7	0.4572
2	27525730	rs1260334	A	C	0.6025	0.0455	0.3975	C	7.162	0.0218584	0.003052	7.939e-13	+++-?+++-	448268	26.4	9.514	7	0.2178
2	27525757	rs1260333	A	G	0.3961	0.0447	0.3961	A	-6.91	-0.0208657	0.00301964	4.85e-12	---++---+	458479	48.8	15.627	8	0.04804
2	27526037	rs1313566	A	G	0.6023	0.0452	0.3977	G	6.993	0.0211015	0.00301752	2.686e-12	+++--+++-	458491	37.8	12.852	8	0.117
2	27527678	rs2950835	A	G	0.4031	0.0509	0.4031	A	-5.607	-0.0170958	0.00304902	2.062e-08	---+?---?	447060	3.4	6.21	6	0.4
2	27529596	rs11127048	A	G	0.6351	0.0313	0.3649	G	5.902	0.0187907	0.00318379	3.6e-09	+?+---++?	425692	9.4	6.622	6	0.3572
2	27530004	rs6753534	T	C	0.6063	0.0451	0.3937	C	6.586	0.0199415	0.00302786	4.523e-11	+++--+++?	456956	26.6	9.532	7	0.2167
3	85351651	rs62253088	T	C	0.3767	0.0041	0.3767	T	5.595	0.0172799	0.00308846	2.203e-08	++++?+++?	446502	0	5.183	6	0.5206
3	85354742	rs28732378	A	G	0.3182	0.0176	0.3182	A	6.068	0.019283	0.00317782	1.292e-09	+++--+++?	456440	27.2	9.622	7	0.211
3	85354880	rs62253107	T	G	0.3643	0.0097	0.3643	T	6.453	0.0200686	0.00310997	1.099e-10	+++-?+++?	446453	0	2.841	6	0.8285
3	85355633	rs2117152	T	G	0.6196	0.0038	0.3804	G	-5.87	-0.0180971	0.00308299	4.359e-09	---+?---?	446380	30	8.577	6	0.1988
3	85357217	rs12498010	T	C	0.3061	0.0229	0.3061	T	6.471	0.0209705	0.00324068	9.722e-11	+++-?+++-	448298	0	4	7	0.7798
3	85357585	rs4856269	A	G	0.3798	0.0033	0.3798	A	5.952	0.0183499	0.00308298	2.651e-09	+++-?+++?	446654	20.1	7.506	6	0.2765
3	85357788	rs11705775	T	G	0.3448	0.0086	0.3448	T	5.681	0.017852	0.0031424	1.341e-08	+++-?+++-	448265	0	6.5	7	0.4827
3	85358830	rs9814516	T	G	0.3061	0.0229	0.3061	T	6.198	0.0198817	0.00320775	5.736e-10	+++--+++?	457549	23.1	9.103	7	0.2453
3	85360163	rs9824178	A	G	0.6604	0.0139	0.3396	G	-6.562	-0.0207103	0.00315609	5.301e-11	---+?---+	447638	0	5.497	7	0.5995
3	85360203	rs9861451	A	G	0.3399	0.0137	0.3399	A	6.621	0.020892	0.00315541	3.564e-11	+++-?+++-	447638	0	5.547	7	0.5935
3	85360320	rs11917490	A	G	0.6346	0.0101	0.3654	G	-6.518	-0.0202538	0.00310736	7.105e-11	---+?---?	446631	0	3.02	6	0.8063
3	85360734	rs13076632	T	C	0.3031	0.0239	0.3031	T	6.174	0.0198412	0.00321366	6.66e-10	+++--+++-	458398	16.5	9.583	8	0.2955
3	85361862	rs12714625	A	G	0.3449	0.0084	0.3449	A	5.708	0.017935	0.00314208	1.146e-08	+++-?+++-	448296	0	6.525	7	0.4799
3	85362043	rs9990096	T	G	0.617	0.004	0.383	G	-6.143	-0.0189079	0.00307796	8.093e-10	---+?---?	446674	20.1	7.51	6	0.2762
3	85363180	rs1368748	A	G	0.4046	0.0135	0.4046	A	5.848	0.0178287	0.00304869	4.981e-09	+++-?+++?	446621	0	4.242	6	0.644
3	85364030	rs12494242	T	C	0.6506	0.0076	0.3494	C	-5.464	-0.016925	0.00309755	4.659e-08	---++---+	458486	41.5	13.681	8	0.09047
3	85364845	rs9866089	T	C	0.6909	0.0217	0.3091	C	-6.387	-0.0204118	0.00319583	1.696e-10	---++---+	458478	18.5	9.821	8	0.2778
3	85365141	rs7627971	T	C	0.3408	0.013	0.3408	T	6.579	0.0207462	0.0031534	4.737e-11	+++-?+++-	447635	0	5.387	7	0.6128
3	85365706	rs11127887	A	G	0.3031	0.0239	0.3031	A	6.18	0.0198604	0.00321366	6.405e-10	+++--+++-	458398	14.1	9.312	8	0.3166
3	85373437	rs9865191	T	C	0.3056	0.0232	0.3056	T	6.381	0.0204595	0.00320632	1.763e-10	+++--+++-	458377	16.3	9.56	8	0.2973
3	85377690	rs6776114	A	G	0.6326	0.01	0.3674	G	-6.713	-0.0208407	0.00310453	1.908e-11	---+?---?	446416	0	3.184	6	0.7854
3	85379576	rs2163971	T	C	0.4618	0.031	0.4618	T	5.728	0.0178247	0.00311186	1.018e-08	+?++?-++?	415492	0	1.258	5	0.9392
3	85379813	rs1433711	T	C	0.3036	0.023	0.3036	T	6.329	0.0203396	0.00321372	2.469e-10	+++--+++-	457957	6.1	8.515	8	0.3848
3	85380022	rs13085170	A	C	0.3042	0.023	0.3042	A	6.281	0.0201758	0.00321219	3.371e-10	+++--+++-	457882	4.7	8.391	8	0.3962
3	85380987	rs9819830	T	C	0.6974	0.0236	0.3026	C	-6.33	-0.0203679	0.00321767	2.448e-10	---+++--+	457683	13.9	9.293	8	0.3182
3	85385110	rs11921010	T	C	0.4283	0.0192	0.4283	T	6.495	0.019628	0.00302201	8.283e-11	++++?+++-	447189	0	3.594	7	0.8251
3	85386975	rs9879025	T	C	0.3074	0.022	0.3074	T	6.252	0.0200222	0.00320252	4.045e-10	+++--+++-	457962	8.5	8.744	8	0.3643
3	85389414	rs1821349	A	G	0.6981	0.024	0.3019	G	-6.338	-0.0204072	0.00321982	2.321e-10	---++---+	457674	6.7	8.577	8	0.3792
3	85389559	rs1368743	A	G	0.6981	0.024	0.3019	G	-6.327	-0.0203718	0.00321983	2.503e-10	---++---+	457672	7.4	8.637	8	0.3739
3	85389986	rs10511087	A	G	0.4196	0.0187	0.4196	A	6.751	0.0204496	0.00302913	1.467e-11	++++?+++-	447509	0	3.801	7	0.8024
3	85393058	rs1368742	A	G	0.4217	0.0195	0.4217	A	6.814	0.0206469	0.00303007	9.513e-12	++++?-++?	446621	0	0.561	6	0.997
3	85393559	rs9309977	T	C	0.3015	0.0242	0.3015	T	6.318	0.0203515	0.0032212	2.647e-10	+++--+++-	457627	8.2	8.719	8	0.3665
3	85394643	rs1991872	A	G	0.6078	0.031	0.3922	G	-6.987	-0.0214177	0.00306536	2.812e-12	----?---?	446446	0	1.616	6	0.9514
3	85397626	rs12637798	A	G	0.3924	0.0311	0.3924	A	6.928	0.0212205	0.00306301	4.28e-12	++++?+++?	447051	0	2.014	6	0.9184
3	85399343	rs9863620	T	C	0.7247	0.0103	0.2753	C	-6.547	-0.0216619	0.00330868	5.856e-11	---++---+	457854	24.3	10.569	8	0.2273
3	85400627	rs71626887	T	G	0.2751	0.0103	0.2751	T	6.56	0.0217113	0.00330964	5.391e-11	+++--+++-	457793	25.8	10.776	8	0.2147
3	85402654	rs7650834	A	C	0.2754	0.0101	0.2754	A	6.543	0.0216462	0.0033083	6.021e-11	+++--+++-	457854	24.5	10.6	8	0.2254
3	85405665	rs12638482	T	C	0.607	0.0313	0.393	C	-6.995	-0.0214182	0.00306193	2.646e-12	----?---?	447123	0	2.17	6	0.9034
3	85408090	rs62250685	A	G	0.3957	0.0328	0.3957	A	6.978	0.0213412	0.00305835	2.997e-12	++++?+++?	447103	0	2.041	6	0.9159
3	85409533	rs2117151	A	C	0.2753	0.0102	0.2753	A	6.559	0.0217011	0.0033086	5.431e-11	+++--+++-	457875	22.3	10.293	8	0.245
3	85409711	rs1030721	T	C	0.7246	0.0103	0.2754	C	-6.545	-0.0216524	0.00330823	5.955e-11	---++---+	457875	20	10.001	8	0.265
3	85410981	rs1549979	T	C	0.6053	0.0341	0.3947	C	-6.984	-0.0213639	0.00305897	2.864e-12	----?---?	447312	0	2.093	6	0.9109
3	85412152	rs9880919	A	G	0.2696	0.0114	0.2696	A	6.487	0.0218501	0.00336829	8.752e-11	+-+-?-++-	447610	24.2	9.234	7	0.2363
3	85414975	rs4856569	A	G	0.3928	0.0314	0.3928	A	6.994	0.021414	0.00306176	2.671e-12	++++?+++?	447253	0	2.06	6	0.9141
3	85417302	rs6549024	T	C	0.7243	0.0099	0.2757	C	-6.527	-0.0215864	0.00330725	6.732e-11	-+-++---+	457837	22.3	10.291	8	0.2452
3	85418822	rs2053108	A	C	0.6213	0.025	0.3787	C	-6.638	-0.0204529	0.00308118	3.178e-11	---+?---+	447682	0	5.154	7	0.6412
3	85418909	rs6808400	T	C	0.3787	0.025	0.3787	T	6.638	0.0204529	0.00308118	3.187e-11	+++-?+++-	447682	0	5.153	7	0.6413
3	85419769	rs12493461	A	G	0.7247	0.0103	0.2753	G	-6.536	-0.0216259	0.00330873	6.316e-11	---++---+	457838	21.6	10.203	8	0.2511
3	85421537	rs60311538	T	G	0.3959	0.0328	0.3959	T	6.996	0.0213917	0.00305771	2.643e-12	++++?+++?	447213	0	2.082	6	0.912
3	85422668	rs10433498	A	G	0.2753	0.0099	0.2753	A	6.585	0.0217891	0.0033089	4.557e-11	+++--+++-	457792	24.5	10.598	8	0.2255
3	85422883	rs7636243	T	C	0.6213	0.025	0.3787	C	-6.623	-0.0204066	0.00308118	3.525e-11	---+?---+	447682	0	4.69	7	0.6977
3	85423077	rs7650284	T	C	0.3787	0.025	0.3787	T	6.638	0.0204529	0.00308118	3.178e-11	+++-?+++-	447682	0	4.411	7	0.7314
3	85423312	rs7638953	A	G	0.6213	0.025	0.3787	G	-6.686	-0.0206227	0.00308445	2.297e-11	---+?---?	446732	0	3.027	6	0.8055
3	85424167	rs6772991	A	G	0.7246	0.0102	0.2754	G	-6.53	-0.0216036	0.00330836	6.587e-11	---++---+	457838	21.2	10.146	8	0.2549
3	85426497	rs35894540	T	C	0.393	0.0314	0.393	T	6.991	0.021405	0.00306179	2.736e-12	++++?+++?	447164	0	2.01	6	0.9187
3	85426944	rs13081230	A	G	0.2753	0.0102	0.2753	A	6.579	0.0217682	0.00330874	4.745e-11	+++--+++-	457837	22.3	10.296	8	0.2449
3	85427748	rs6808159	T	C	0.2752	0.0102	0.2752	T	6.561	0.021711	0.00330911	5.362e-11	+++--+++-	457838	21.9	10.247	8	0.2481
3	85427867	rs2326309	T	G	0.3789	0.0249	0.3789	T	6.619	0.0203922	0.00308086	3.618e-11	+++-?+++-	447681	0	4.531	7	0.717
3	85431034	rs1025533	T	C	0.2753	0.0103	0.2753	T	6.567	0.0217285	0.00330873	5.127e-11	+++--+++-	457838	19.7	9.96	8	0.2678
3	85432262	rs1865250	T	C	0.3962	0.0328	0.3962	T	7.008	0.0214328	0.00305834	2.417e-12	++++?+++?	446911	0	1.857	6	0.9323
3	85432829	rs1433708	T	C	0.3787	0.0248	0.3787	T	6.676	0.0205769	0.00308223	2.462e-11	+++-?+++-	447378	0	4.268	7	0.7485
3	85433137	rs9860769	T	C	0.6212	0.0249	0.3788	C	-6.684	-0.0206006	0.00308207	2.327e-11	---+?---+	447376	0	4.276	7	0.7475
3	85433445	rs7609594	A	G	0.6212	0.0248	0.3788	G	-6.691	-0.0206221	0.00308207	2.219e-11	---+?---+	447378	0	4.278	7	0.7473
3	85433511	rs35827242	A	G	0.6059	0.0319	0.3941	G	-7.018	-0.0214872	0.00306173	2.257e-12	----?---?	446743	0	1.813	6	0.936
3	85435960	rs13092627	T	C	0.2751	0.0105	0.2751	T	6.59	0.0218102	0.00330959	4.387e-11	+++--+++-	457808	22.8	10.364	8	0.2404
3	85436080	rs2217720	T	G	0.6213	0.0248	0.3787	G	-6.689	-0.020617	0.00308223	2.247e-11	---+?---+	447378	0	4.296	7	0.7451
3	85438315	rs9863488	A	G	0.6213	0.0249	0.3787	G	-6.801	-0.0209623	0.00308224	1.038e-11	---+?---+	447374	0	4.094	7	0.7689
3	85438332	rs11929525	T	C	0.3957	0.0324	0.3957	T	7.106	0.0217373	0.003059	1.194e-12	++++?+++?	446912	0	1.772	6	0.9394
3	85439149	rs12629036	T	C	0.3939	0.0318	0.3939	T	6.99	0.0214005	0.00306159	2.745e-12	++++?+++?	446865	0	1.818	6	0.9357
3	85439175	rs1821351	T	C	0.6202	0.0255	0.3798	C	-6.386	-0.0194515	0.00304596	1.705e-10	---++---+	457578	17.9	9.743	8	0.2836
3	85439203	rs12637461	T	G	0.6058	0.032	0.3942	G	-6.992	-0.0214038	0.00306118	2.718e-12	----?---?	446865	0	1.786	6	0.9383
3	85439312	rs9868427	T	C	0.2753	0.0104	0.2753	T	6.596	0.0218251	0.00330884	4.213e-11	+++--+++-	457808	18.1	9.771	8	0.2815
3	85439496	rs9813512	T	G	0.7246	0.0103	0.2754	G	-6.851	-0.0229231	0.00334595	7.33e-12	---+?---+	447608	0	5.354	7	0.6168
3	85439590	rs1865252	A	G	0.3788	0.0249	0.3788	A	6.706	0.0206689	0.00308215	1.996e-11	+++-?+++-	447353	0	4.224	7	0.7536
3	85439919	rs1865251	A	C	0.3938	0.0317	0.3938	A	7.018	0.0214872	0.00306172	2.255e-12	++++?+++?	446865	0	1.827	6	0.9349
3	85440756	rs9874740	A	G	0.2754	0.0103	0.2754	A	6.627	0.0219252	0.00330847	3.419e-11	+++--+++-	457808	18.3	9.795	8	0.2797
3	85441797	rs2082556	A	G	0.6038	0.0328	0.3962	G	-7.037	-0.0215215	0.00305834	1.966e-12	----?---?	446912	0	1.861	6	0.932
3	85444075	rs7627044	A	G	0.6064	0.0318	0.3936	G	-7.021	-0.0214983	0.003062	2.201e-12	----?---?	446865	0	1.813	6	0.9361
3	85445117	rs9821041	T	C	0.2751	0.0101	0.2751	T	6.644	0.0219889	0.00330959	3.056e-11	+++--+++-	457808	21	10.124	8	0.2564
3	85445269	rs4856572	T	C	0.3937	0.0317	0.3937	T	7.026	0.0215126	0.00306186	2.12e-12	++++?+++?	446865	0	1.819	6	0.9356
3	85447481	rs11127890	T	C	0.2754	0.0103	0.2754	T	6.584	0.021783	0.00330847	4.593e-11	+++--+++-	457808	18.7	9.845	8	0.2761
3	85447608	rs2033526	A	C	0.3963	0.033	0.3963	A	6.902	0.0210865	0.00305513	5.143e-12	++++?+++-	447811	0	4.142	7	0.7633
3	85448657	rs11922956	A	G	0.3808	0.0274	0.3808	A	7.157	0.0220344	0.00307873	8.267e-13	++++?+++-	447435	0	4.495	7	0.7213
3	85449077	rs12486239	A	G	0.6308	0.0181	0.3692	G	-6.661	-0.0214132	0.00321471	2.728e-11	-?--?---?	415492	0	1.129	5	0.9515
3	85449885	rs993137	T	C	0.6036	0.0326	0.3964	C	-6.997	-0.0213984	0.00305823	2.61e-12	----?---?	446866	0	1.928	6	0.9262
3	85450183	rs993136	T	C	0.3876	0.0289	0.3876	T	6.92	0.0212335	0.00306842	4.525e-12	++++?+++-	447456	0	5.316	7	0.6215
3	85451239	rs6762695	A	G	0.3877	0.029	0.3877	A	6.922	0.0212386	0.00306828	4.455e-12	++++?+++-	447456	0	5.398	7	0.6116
3	85452579	rs1433715	A	C	0.6056	0.0285	0.3944	C	-6.931	-0.0212366	0.003064	4.192e-12	----?---?	445965	0	1.784	6	0.9385
3	85452933	rs9835441	A	G	0.2747	0.0107	0.2747	A	6.548	0.0216818	0.00331121	5.812e-11	+++--+++-	457774	14.5	9.354	8	0.3133
3	85453441	rs993716	T	C	0.6119	0.0292	0.3881	C	-6.89	-0.0211364	0.0030677	5.588e-12	----?---+	447456	0	5.239	7	0.6309
3	85455302	rs2117153	A	G	0.6124	0.0289	0.3876	G	-6.93	-0.0212642	0.00306842	4.215e-12	----?---+	447456	0	5.36	7	0.6161
3	85455799	rs1433714	T	G	0.3886	0.0293	0.3886	T	7.012	0.0215042	0.00306677	2.343e-12	++++?+++-	447518	0	5.257	7	0.6287
3	85456724	rs9309980	A	G	0.7253	0.0108	0.2747	G	-6.557	-0.0217115	0.0033112	5.497e-11	---++---+	457777	14	9.307	8	0.317
3	85458081	rs9309982	T	C	0.7252	0.0107	0.2748	C	-6.512	-0.021559	0.00331065	7.436e-11	---++---+	457824	19.3	9.909	8	0.2715
3	85459277	rs57630146	A	G	0.612	0.0291	0.388	G	-6.921	-0.0212321	0.00306779	4.486e-12	----?---+	447473	0	5.395	7	0.6119
3	85459349	rs1368740	A	G	0.7222	0.0097	0.2778	G	-6.44	-0.0212517	0.00329995	1.192e-10	---++---+	457716	21.5	10.197	8	0.2514
3	85459432	rs1368739	T	C	0.7254	0.0108	0.2746	C	-6.508	-0.0215506	0.0033114	7.638e-11	---++---+	457824	19.8	9.97	8	0.2671
3	85459803	rs4856573	A	G	0.6122	0.0289	0.3878	G	-6.947	-0.0213139	0.00306808	3.721e-12	----?---+	447473	0	5.279	7	0.6259
3	85460841	rs12633762	T	C	0.7252	0.0107	0.2748	C	-6.488	-0.0214796	0.00331066	8.72e-11	---++---+	457821	19.2	9.898	8	0.2723
3	85461033	rs11127891	T	C	0.7251	0.0107	0.2749	C	-6.496	-0.0215036	0.00331029	8.275e-11	---++---+	457821	18.7	9.843	8	0.2762
3	85463674	rs9838811	A	C	0.2755	0.0102	0.2755	A	6.491	0.0214725	0.00330804	8.55e-11	+++--+++-	457824	18.2	9.776	8	0.2811
3	85463850	rs6774985	T	C	0.3894	0.0297	0.3894	T	6.991	0.0214318	0.00306563	2.724e-12	++++?+++-	447515	0	5.264	7	0.6278
3	85463965	rs6762267	A	C	0.6034	0.0327	0.3966	C	-7.066	-0.0216073	0.00305793	1.594e-12	----?---?	446876	0	1.883	6	0.9302
3	85464566	rs62250712	T	C	0.6032	0.033	0.3968	C	-7.047	-0.0215484	0.00305781	1.831e-12	----?---?	446835	0	2.011	6	0.9187
3	85464643	rs62250713	A	G	0.386	0.0304	0.386	A	6.964	0.0214082	0.00307412	3.313e-12	++++?-++?	446481	0	1.611	6	0.9518
3	85466626	rs62250714	A	G	0.616	0.0271	0.384	G	-6.9	-0.021208	0.00307363	5.2e-12	----?---+	447493	0	5.255	7	0.6289
3	85466846	rs62250715	A	G	0.6159	0.0271	0.3841	G	-6.901	-0.0212097	0.00307342	5.147e-12	----?---+	447508	0	5.48	7	0.6016
3	85470261	rs1368750	T	C	0.3869	0.0285	0.3869	T	6.925	0.0212534	0.00306908	4.363e-12	++++?-++-	447562	0	6.281	7	0.5073
3	85471867	rs1155666	T	C	0.3865	0.0283	0.3865	T	6.931	0.0212759	0.00306967	4.166e-12	++++?-++-	447562	0	6.295	7	0.5058
3	85473644	rs2069123	T	G	0.3868	0.0285	0.3868	T	6.933	0.021279	0.00306923	4.112e-12	++++?-++-	447562	0	6.304	7	0.5048
3	85478184	rs1542248	A	G	0.6134	0.0283	0.3866	G	-6.938	-0.0212962	0.00306951	3.99e-12	----?+--+	447566	0	6.237	7	0.5124
3	85480478	rs7614148	A	G	0.6132	0.0285	0.3868	G	-6.922	-0.0212452	0.00306923	4.444e-12	----?+--+	447562	0	6.248	7	0.5111
3	85482700	rs62250719	T	G	0.615	0.0274	0.385	G	-6.924	-0.0212767	0.00307289	4.405e-12	----?+--+	447270	0	6.06	7	0.5328
3	85482737	rs10511085	A	C	0.6153	0.0273	0.3847	C	-6.928	-0.0212921	0.00307334	4.259e-12	----?+--+	447270	0	6.036	7	0.5355
3	85482969	rs17515196	A	G	0.6132	0.0286	0.3868	G	-6.947	-0.0213219	0.00306923	3.739e-12	----?+--+	447561	0	6.338	7	0.5009
3	85486706	rs57872438	A	G	0.6134	0.0284	0.3866	G	-6.964	-0.0213767	0.0030696	3.307e-12	----?+--+	447538	0	5.982	7	0.5418
3	85489806	rs55994690	A	T	0.5735	0.0129	0.4265	T	-5.462	-0.0210582	0.0038554	4.701e-08	??--?+--?	275048	0	1.203	4	0.8775
3	85489834	rs55897272	A	G	0.6126	0.0288	0.3874	G	-6.925	-0.0212439	0.00306771	4.364e-12	----?+--+	447748	0	5.981	7	0.542
3	85490660	rs11127895	T	G	0.3861	0.028	0.3861	T	6.924	0.0212538	0.00306958	4.379e-12	++++?-++-	447760	0	5.898	7	0.5518
3	85490666	rs11127896	T	C	0.6138	0.028	0.3862	C	-6.948	-0.0213264	0.00306943	3.712e-12	----?+--+	447760	0	5.855	7	0.5568
3	85495060	rs1551043	T	G	0.6134	0.0283	0.3866	G	-6.969	-0.0213862	0.00306877	3.198e-12	----?---+	447782	0	5.693	7	0.5761
3	85497648	rs10433500	A	G	0.62	0.0261	0.38	G	-6.913	-0.0212891	0.00307958	4.739e-12	----?---+	447550	0	5.679	7	0.5777
3	85499870	rs7618429	A	G	0.3866	0.0284	0.3866	A	6.976	0.0214077	0.00306877	3.032e-12	++++?+++-	447781	0	5.721	7	0.5727
3	85501819	rs62250750	T	C	0.3866	0.0284	0.3866	T	6.979	0.0214169	0.00306877	2.983e-12	++++?+++-	447782	0	5.72	7	0.5727
3	85505432	rs1449391	T	G	0.6135	0.0281	0.3865	G	-7.02	-0.0215361	0.00306782	2.213e-12	----?---+	448102	0	5.649	7	0.5813
3	85508421	rs62250754	T	G	0.6133	0.0283	0.3867	G	-7	-0.0214725	0.00306751	2.551e-12	----?---+	448107	0	5.556	7	0.5924
3	85514696	rs6804845	A	C	0.3865	0.0285	0.3865	A	7.017	0.0215268	0.0030678	2.274e-12	++++?+++-	448107	0	5.561	7	0.5918
3	85515713	rs62250758	T	G	0.6137	0.0283	0.3863	G	-7.024	-0.0215505	0.00306812	2.15e-12	----?---+	448100	0	5.52	7	0.5968
3	85516578	rs1375560	T	G	0.6138	0.0284	0.3862	G	-6.997	-0.0214691	0.00306833	2.617e-12	----?---+	448080	0	6.262	7	0.5095
3	85520022	rs17515586	A	G	0.3865	0.0284	0.3865	A	6.986	0.0214317	0.0030678	2.824e-12	++++?+++-	448107	0	5.574	7	0.5903
3	85521809	rs10511083	A	G	0.3865	0.0285	0.3865	A	6.991	0.021447	0.0030678	2.723e-12	++++?+++-	448107	0	5.511	7	0.5978
3	85521899	rs62252461	A	G	0.3709	0.0308	0.3709	A	-5.53	-0.017103	0.00309277	3.197e-08	---+?---+	448052	0	4.614	7	0.7069
3	85522103	rs6764988	A	C	0.3863	0.0284	0.3863	A	6.998	0.0214709	0.00306815	2.605e-12	++++?+++-	448092	0	6.062	7	0.5326
3	85522733	rs1868532	T	C	0.6136	0.0284	0.3864	C	-7.026	-0.0215554	0.00306795	2.13e-12	----?---+	448106	0	5.501	7	0.5991
3	85523399	rs1449393	T	C	0.6136	0.0284	0.3864	C	-7.028	-0.0215616	0.00306795	2.1e-12	----?---+	448106	0	5.501	7	0.599
3	85523762	rs1449394	T	C	0.6135	0.0285	0.3865	C	-7.001	-0.0214777	0.0030678	2.541e-12	----?---+	448106	0	5.533	7	0.5952
3	85523936	rs4856579	T	C	0.3864	0.0285	0.3864	T	7.003	0.0214848	0.00306795	2.507e-12	++++?+++-	448107	0	5.531	7	0.5955
3	85524922	rs58828944	T	C	0.3865	0.0285	0.3865	T	6.981	0.0214129	0.00306732	2.925e-12	++++?+++-	448248	0	5.684	7	0.5771
3	85525270	rs62252462	A	G	0.6135	0.0284	0.3865	G	-6.975	-0.0213946	0.00306733	3.065e-12	----?---+	448244	0	5.649	7	0.5813
3	85525409	rs62252463	A	G	0.6136	0.0284	0.3864	G	-6.99	-0.0214417	0.00306748	2.749e-12	----?---+	448244	0	5.689	7	0.5765
3	85525544	rs62252464	A	G	0.3875	0.0292	0.3875	A	6.959	0.0213354	0.00306587	3.416e-12	++++?+++-	448244	0	5.733	7	0.5713
3	85525549	rs62252465	T	C	0.6124	0.0292	0.3876	C	-6.959	-0.0213344	0.00306573	3.418e-12	----?---+	448244	0	5.741	7	0.5703
3	85525592	rs62252466	A	G	0.387	0.0288	0.387	A	6.902	0.0211657	0.0030666	5.145e-12	++++?+++-	448244	0	5.753	7	0.5689
3	85526215	rs1470635	T	C	0.6135	0.0285	0.3865	C	-6.97	-0.0213793	0.00306733	3.164e-12	----?---+	448244	0	5.692	7	0.5761
3	85526291	rs1470636	A	C	0.3865	0.0285	0.3865	A	6.978	0.0214037	0.00306732	2.994e-12	++++?+++-	448248	0	5.684	7	0.5771
3	85526369	rs7427346	T	C	0.3865	0.0285	0.3865	T	6.979	0.0214068	0.00306732	2.981e-12	++++?+++-	448248	0	5.686	7	0.5769
3	85526540	rs35738543	T	G	0.3866	0.0285	0.3866	T	6.981	0.0214119	0.00306717	2.939e-12	++++?+++-	448248	0	5.692	7	0.5762
3	85526573	rs17456263	A	C	0.6134	0.0285	0.3866	C	-6.982	-0.021415	0.00306717	2.908e-12	----?---+	448248	0	5.691	7	0.5763
3	85526625	rs35701422	T	C	0.3864	0.0284	0.3864	T	6.973	0.0213894	0.00306746	3.092e-12	++++?+++-	448248	0	5.665	7	0.5794
3	85526694	rs59967234	A	G	0.3866	0.0284	0.3866	A	6.965	0.0213628	0.00306717	3.276e-12	++++?+++-	448248	0	5.644	7	0.5819
3	85526836	rs59225869	A	G	0.3863	0.0283	0.3863	A	6.946	0.0213076	0.00306761	3.758e-12	++++?+++-	448248	0	5.663	7	0.5796
3	85526941	rs60427790	T	C	0.3862	0.0282	0.3862	T	6.949	0.0213179	0.00306777	3.682e-12	++++?+++-	448246	0	5.661	7	0.5798
3	85526954	rs56778912	T	C	0.6138	0.0281	0.3862	C	-6.954	-0.0213332	0.00306776	3.557e-12	----?---+	448248	0	5.63	7	0.5835
3	85527308	rs66505109	A	C	0.3865	0.0283	0.3865	A	6.967	0.02137	0.00306732	3.235e-12	++++?+++-	448248	0	5.634	7	0.583
3	85527498	rs7628237	A	G	0.3866	0.0284	0.3866	A	6.965	0.0213629	0.00306718	3.273e-12	++++?+++-	448246	0	5.625	7	0.5841
3	85527856	rs56777875	A	G	0.6135	0.0285	0.3865	G	-6.98	-0.0214099	0.00306732	2.96e-12	----?---+	448248	0	5.685	7	0.577
3	85528016	rs4856581	A	G	0.6136	0.0285	0.3864	G	-6.978	-0.0214048	0.00306746	2.993e-12	----?---+	448248	0	5.687	7	0.5768
3	85528119	rs4856583	A	G	0.3864	0.0284	0.3864	A	6.986	0.0214295	0.00306749	2.832e-12	++++?+++-	448240	0	5.662	7	0.5798
3	85528387	rs1449389	A	G	0.3868	0.0286	0.3868	A	6.996	0.0214559	0.00306688	2.64e-12	++++?+++-	448248	0	5.521	7	0.5966
3	85528553	rs1449390	A	G	0.613	0.0287	0.387	G	-6.963	-0.0213526	0.00306659	3.322e-12	----?---+	448248	0	5.583	7	0.5892
3	85528927	rs55939743	A	G	0.613	0.0287	0.387	G	-6.978	-0.0213986	0.00306659	3.001e-12	----?---+	448248	0	5.602	7	0.5869
3	85528979	rs62252495	A	G	0.6124	0.0291	0.3876	G	-7.001	-0.021463	0.00306571	2.537e-12	----?---+	448248	0	5.554	7	0.5927
3	85529030	rs62252496	A	G	0.6129	0.0288	0.3871	G	-7.019	-0.0215233	0.00306644	2.24e-12	----?---+	448248	0	5.522	7	0.5966
3	85529313	rs62252497	T	C	0.6132	0.0286	0.3868	C	-6.992	-0.0214436	0.00306688	2.712e-12	----?---+	448248	0	5.547	7	0.5935
3	85529575	rs56187922	A	C	0.6132	0.0286	0.3868	C	-6.991	-0.0214405	0.00306688	2.733e-12	----?---+	448248	0	5.55	7	0.5931
3	85530456	rs62252499	A	G	0.3869	0.0286	0.3869	A	6.989	0.0214335	0.00306675	2.759e-12	++++?+++-	448244	0	5.56	7	0.592
3	85530460	rs62252500	T	C	0.6131	0.0286	0.3869	C	-7.005	-0.0214825	0.00306674	2.465e-12	----?---+	448247	0	5.556	7	0.5924
3	85530488	rs62252501	A	G	0.386	0.0286	0.386	A	6.991	0.0214492	0.00306812	2.735e-12	++++?+++-	448230	0	5.446	7	0.6057
3	85531438	rs17516256	A	G	0.6165	0.0274	0.3835	G	-7.022	-0.0215727	0.00307216	2.189e-12	----?---+	448141	0	5.522	7	0.5965
3	85531949	rs11923525	A	G	0.6186	0.0259	0.3814	G	-6.914	-0.0212635	0.00307543	4.726e-12	----?---+	448123	0	4.151	7	0.7623
3	85532081	rs77657121	A	G	0.6131	0.0288	0.3869	G	-6.986	-0.0214239	0.00306669	2.83e-12	----?---+	448260	0	5.515	7	0.5974
3	85532236	rs17516284	A	G	0.6133	0.0285	0.3867	G	-6.943	-0.0212941	0.00306698	3.832e-12	----?---+	448260	0	5.42	7	0.6089
3	85532629	rs62252505	T	C	0.6115	0.0295	0.3885	C	-6.941	-0.021272	0.00306468	3.894e-12	----?---+	448168	0	5.417	7	0.6093
3	85532841	rs113351222	A	C	0.3875	0.0289	0.3875	A	6.964	0.0213503	0.00306582	3.299e-12	++++?+++-	448260	0	5.408	7	0.6103
3	85532876	rs62252506	T	C	0.3875	0.0289	0.3875	T	6.97	0.0213687	0.00306582	3.176e-12	++++?+++-	448260	0	5.423	7	0.6085
3	85532928	rs62252507	T	C	0.6128	0.0288	0.3872	C	-6.982	-0.0214086	0.00306625	2.918e-12	----?---+	448260	0	5.425	7	0.6082
3	85533095	rs62252509	T	C	0.6127	0.0283	0.3873	C	-6.96	-0.0213401	0.00306611	3.401e-12	----?---+	448260	0	5.406	7	0.6106
3	85533493	rs17456763	T	C	0.6129	0.0286	0.3871	C	-6.932	-0.0212564	0.00306642	4.135e-12	----?---+	448255	0	5.435	7	0.6071
3	85533530	rs17516346	A	G	0.3876	0.029	0.3876	A	6.94	0.0212758	0.00306567	3.915e-12	++++?+++-	448260	0	5.419	7	0.609
3	85533563	rs67018424	A	G	0.6124	0.029	0.3876	G	-6.954	-0.0213187	0.00306567	3.55e-12	----?---+	448260	0	5.445	7	0.6059
3	85534043	rs10511076	A	G	0.387	0.0286	0.387	A	6.931	0.0212542	0.00306654	4.171e-12	++++?+++-	448260	0	5.449	7	0.6054
3	85534253	rs10511075	A	G	0.613	0.0286	0.387	G	-6.967	-0.0213649	0.00306658	3.243e-12	----?---+	448250	0	5.427	7	0.608
3	85534321	rs58919842	A	G	0.6129	0.0287	0.3871	G	-6.97	-0.0213728	0.0030664	3.162e-12	----?---+	448260	0	5.45	7	0.6053
3	85534392	rs59770976	A	G	0.3871	0.0287	0.3871	A	6.977	0.0213943	0.0030664	3.007e-12	++++?+++-	448260	0	5.443	7	0.6061
3	85534595	rs56779213	A	G	0.387	0.0287	0.387	A	6.969	0.0213707	0.00306654	3.185e-12	++++?+++-	448260	0	5.453	7	0.6049
3	85534795	rs17516504	T	C	0.3879	0.0292	0.3879	T	6.948	0.0212973	0.00306524	3.707e-12	++++?+++-	448260	0	5.44	7	0.6065
3	85535875	rs17516546	A	G	0.3897	0.0304	0.3897	A	6.847	0.0209766	0.00306362	7.567e-12	++++?+++-	447978	0	6.036	7	0.5355
3	85535885	rs73130364	T	C	0.3897	0.0304	0.3897	T	6.852	0.0209919	0.00306362	7.291e-12	++++?+++-	447978	0	6.051	7	0.5338
3	85535886	rs73130366	A	G	0.6103	0.0304	0.3897	G	-6.847	-0.0209766	0.00306362	7.521e-12	----?---+	447978	0	6.043	7	0.5347
3	85535941	rs66625173	A	G	0.3878	0.0291	0.3878	A	6.981	0.0213994	0.00306538	2.921e-12	++++?+++-	448260	0	5.441	7	0.6064
3	85536127	rs17457050	T	C	0.6129	0.0289	0.3871	C	-7.01	-0.0214955	0.0030664	2.377e-12	----?---+	448260	0	5.477	7	0.602
3	85536281	rs17516683	A	G	0.613	0.0286	0.387	G	-6.97	-0.0213738	0.00306654	3.175e-12	----?---+	448260	0	5.451	7	0.6051
3	85536496	rs66781790	A	G	0.3872	0.0288	0.3872	A	6.953	0.0213197	0.00306625	3.585e-12	++++?+++-	448260	0	5.461	7	0.6039
3	85536710	rs17457189	A	G	0.613	0.0286	0.387	G	-6.967	-0.0213646	0.00306654	3.228e-12	----?---+	448260	0	5.461	7	0.6039
3	85537598	rs9713905	A	G	0.3759	0.0293	0.3759	A	-5.561	-0.0171535	0.00308461	2.681e-08	---+?---+	447994	0	3.161	7	0.8698
3	85537656	rs2167046	A	G	0.6112	0.0298	0.3888	G	-7.182	-0.0220141	0.00306517	6.88e-13	----?---+	447899	0	5.158	7	0.6407
3	85537685	rs2167047	A	T	0.4115	0.012	0.4115	A	5.507	0.0201821	0.00366481	3.653e-08	?+++?+++-	307455	0	4.481	6	0.6119
3	85537771	rs2122235	T	C	0.612	0.0291	0.388	C	-6.938	-0.0212656	0.00306509	3.99e-12	----?---+	448260	0	5.488	7	0.6007
3	85538387	rs62252513	T	C	0.613	0.0286	0.387	C	-6.974	-0.0213861	0.00306654	3.072e-12	----?---+	448260	0	5.471	7	0.6027
3	85538560	rs17516857	A	C	0.387	0.0286	0.387	A	6.974	0.0213861	0.00306654	3.078e-12	++++?+++-	448260	0	5.471	7	0.6027
3	85538920	rs34467301	T	C	0.3871	0.0285	0.3871	T	6.959	0.0213391	0.0030664	3.438e-12	++++?+++-	448260	0	5.422	7	0.6086
3	85539055	rs35438712	T	C	0.387	0.0286	0.387	T	6.953	0.0213205	0.00306637	3.567e-12	++++?+++-	448310	0	5.563	7	0.5915
3	85539225	rs17457377	T	G	0.388	0.0293	0.388	T	7.002	0.0214606	0.00306492	2.527e-12	++++?+++-	448310	0	5.549	7	0.5933
3	85539344	rs62252516	T	C	0.6129	0.0287	0.3871	C	-6.96	-0.0213409	0.00306623	3.4e-12	----?---+	448310	0	5.568	7	0.591
3	85539812	rs17457426	A	C	0.3876	0.029	0.3876	A	6.967	0.0213573	0.0030655	3.241e-12	++++?+++-	448310	0	5.556	7	0.5924
3	85539860	rs17457454	T	C	0.3884	0.0296	0.3884	T	6.995	0.0214351	0.00306434	2.662e-12	++++?+++-	448310	0	5.486	7	0.6009
3	85540125	rs6766493	A	G	0.6125	0.0289	0.3875	G	-6.965	-0.0213522	0.00306565	3.293e-12	----?---+	448310	0	5.579	7	0.5896
3	85540430	rs6779501	T	C	0.387	0.0286	0.387	T	6.956	0.0213297	0.00306637	3.498e-12	++++?+++-	448310	0	5.577	7	0.5899
3	85540747	rs4856271	A	G	0.3871	0.0287	0.3871	A	6.943	0.0212888	0.00306623	3.829e-12	++++?+++-	448310	0	5.601	7	0.587
3	85541121	rs62253961	T	C	0.6129	0.0287	0.3871	C	-6.933	-0.0212592	0.00306637	4.134e-12	----?---+	448268	0	5.778	7	0.5658
3	85541958	rs17517121	A	G	0.6129	0.0285	0.3871	G	-6.938	-0.0212735	0.00306623	3.976e-12	----?---+	448310	0	5.52	7	0.5967
3	85542079	rs17517142	A	C	0.387	0.0286	0.387	A	6.955	0.0213266	0.00306637	3.521e-12	++++?+++-	448310	0	5.567	7	0.5911
3	85542213	rs17457642	T	C	0.613	0.0286	0.387	C	-6.958	-0.0213358	0.00306637	3.45e-12	----?---+	448310	0	5.575	7	0.5902
3	85542301	rs17457669	T	C	0.3868	0.0285	0.3868	T	6.957	0.0213348	0.00306667	3.467e-12	++++?+++-	448310	0	5.577	7	0.5899
3	85543192	rs1900918	A	C	0.6126	0.029	0.3874	C	-7.01	-0.0215139	0.00306903	2.381e-12	----?---?	447365	0	2.021	6	0.9177
3	85543348	rs2326317	A	G	0.3858	0.0279	0.3858	A	6.897	0.0211663	0.00306891	5.328e-12	++++?+++-	448084	0	5.575	7	0.5901
3	85543833	rs6777456	T	G	0.6121	0.0292	0.3879	G	-6.965	-0.0213481	0.00306506	3.284e-12	----?---+	448312	0	5.676	7	0.578
3	85543838	rs6777458	A	G	0.6121	0.0292	0.3879	G	-6.964	-0.0213451	0.00306506	3.318e-12	----?---+	448312	0	5.665	7	0.5793
3	85543996	rs17517273	A	C	0.3872	0.0287	0.3872	A	6.947	0.0213	0.00306607	3.729e-12	++++?+++-	448312	0	5.569	7	0.5909
3	85544434	rs6780346	T	C	0.6106	0.0301	0.3894	C	-6.924	-0.0212094	0.00306317	4.392e-12	----?+--+	448234	0	5.59	7	0.5884
3	85544523	rs6804626	A	G	0.3874	0.0291	0.3874	A	6.864	0.0210439	0.00306583	6.683e-12	++++?+++-	448298	0	5.572	7	0.5905
3	85545412	rs11127899	A	G	0.3871	0.0288	0.3871	A	6.961	0.021344	0.00306622	3.386e-12	++++?+++-	448312	0	5.572	7	0.5905
3	85545449	rs11127900	A	G	0.3869	0.0286	0.3869	A	6.947	0.0213031	0.00306651	3.736e-12	++++?+++-	448312	0	5.682	7	0.5773
3	85545545	rs10865610	A	G	0.3769	0.026	0.3769	A	6.684	0.0205999	0.00308197	2.328e-11	++++?+++-	448290	0	3.706	7	0.8129
3	85545696	rs1551045	A	C	0.3869	0.0286	0.3869	A	6.976	0.021392	0.00306651	3.03e-12	++++?+++-	448312	0	5.544	7	0.5938
3	85545983	rs1463204	T	C	0.3869	0.0287	0.3869	T	6.953	0.0213215	0.00306651	3.586e-12	++++?+++-	448312	0	5.539	7	0.5944
3	85546707	rs1551047	T	G	0.6132	0.0286	0.3868	G	-6.951	-0.0213163	0.00306666	3.636e-12	----?---+	448312	0	5.554	7	0.5926
3	85546795	rs1551048	T	G	0.6137	0.0283	0.3863	G	-6.919	-0.0212233	0.00306739	4.533e-12	----?---+	448312	0	5.555	7	0.5925
3	85547069	rs6765881	A	G	0.3871	0.0287	0.3871	A	6.944	0.0212922	0.00306627	3.815e-12	++++?+++-	448298	0	5.559	7	0.5921
3	85547173	rs6765991	A	G	0.387	0.0286	0.387	A	6.964	0.0213545	0.00306641	3.297e-12	++++?+++-	448298	0	5.568	7	0.591
3	85547282	rs1463205	A	G	0.6129	0.0288	0.3871	G	-6.935	-0.0212646	0.00306627	4.049e-12	----?---+	448298	0	5.561	7	0.5918
3	85547329	rs4502590	T	C	0.6129	0.0288	0.3871	C	-6.938	-0.0212738	0.00306627	3.986e-12	----?---+	448298	0	5.566	7	0.5913
3	85547554	rs1463207	T	C	0.6129	0.0287	0.3871	C	-6.921	-0.021222	0.00306632	4.481e-12	----?---+	448283	0	5.547	7	0.5935
3	85547562	rs1463208	A	C	0.6132	0.0285	0.3868	C	-6.956	-0.0213324	0.00306676	3.493e-12	----?---+	448283	0	5.553	7	0.5928
3	85547705	rs4603966	T	C	0.3871	0.0287	0.3871	T	6.944	0.0212922	0.00306627	3.808e-12	++++?+++-	448298	0	5.571	7	0.5906
3	85547859	rs62253964	T	C	0.614	0.028	0.386	C	-6.927	-0.0212512	0.00306788	4.307e-12	----?---+	448298	0	5.585	7	0.5889
3	85547864	rs62253965	A	G	0.6144	0.0278	0.3856	G	-6.907	-0.0211948	0.00306859	4.963e-12	----?---+	448264	0	5.601	7	0.587
3	85548543	rs2875908	T	C	0.3882	0.0293	0.3882	T	6.959	0.0213271	0.00306467	3.433e-12	++++?+++-	448298	0	5.56	7	0.5919
3	85549110	rs4856273	A	G	0.6139	0.0281	0.3861	G	-7.012	-0.021511	0.00306774	2.352e-12	----?---+	448298	0	5.755	7	0.5686
3	85549331	rs6792295	T	C	0.387	0.0287	0.387	T	6.957	0.021333	0.00306641	3.477e-12	++++?+++-	448298	0	5.538	7	0.5946
3	85549931	rs7637527	T	C	0.3871	0.0287	0.3871	T	6.95	0.0213106	0.00306627	3.658e-12	++++?+++-	448298	0	5.557	7	0.5924
3	85550175	rs62253966	A	G	0.6121	0.0293	0.3879	G	-6.939	-0.0212689	0.00306512	3.95e-12	----?---+	448294	0	5.373	7	0.6145
3	85550241	rs4301022	T	G	0.6103	0.0305	0.3897	G	-6.931	-0.0212264	0.00306253	4.176e-12	----?---+	448296	0	5.369	7	0.6151
3	85550561	rs17458504	A	G	0.6108	0.0294	0.3892	G	-7.082	-0.0217234	0.0030674	1.419e-12	----?---?	447081	0	2.565	6	0.8611
3	85550642	rs62253969	A	G	0.6129	0.0286	0.3871	G	-7.022	-0.0215313	0.00306627	2.19e-12	----?---+	448298	0	5.704	7	0.5747
3	85550675	rs17518082	T	C	0.6132	0.0284	0.3868	C	-7.001	-0.02147	0.00306671	2.537e-12	----?---+	448298	0	5.969	7	0.5434
3	85550718	rs17458574	T	G	0.3872	0.0287	0.3872	T	7.004	0.0214751	0.00306612	2.484e-12	++++?+++-	448298	0	5.924	7	0.5486
3	85550768	rs6783137	T	C	0.6129	0.0286	0.3871	C	-7.019	-0.021522	0.00306625	2.229e-12	----?---+	448304	0	5.876	7	0.5543
3	85550827	rs17458609	T	C	0.6121	0.0292	0.3879	C	-7.019	-0.021514	0.00306511	2.24e-12	----?---+	448298	0	5.894	7	0.5522
3	85550927	rs1449405	T	C	0.3871	0.0286	0.3871	T	7.012	0.0215007	0.00306627	2.355e-12	++++?+++-	448298	0	5.704	7	0.5746
3	85551062	rs1449406	A	C	0.3868	0.0284	0.3868	A	6.999	0.021465	0.00306686	2.57e-12	++++?+++-	448252	0	5.667	7	0.5791
3	85551234	rs1449407	A	G	0.3873	0.0288	0.3873	A	7.012	0.0214986	0.00306598	2.354e-12	++++?+++-	448298	0	5.687	7	0.5767
3	85551440	rs6549036	T	G	0.6129	0.0287	0.3871	G	-7.011	-0.0214976	0.00306627	2.359e-12	----?---+	448298	0	5.733	7	0.5713
3	85551558	rs6549037	A	G	0.6127	0.0288	0.3873	G	-6.989	-0.0214281	0.00306598	2.773e-12	----?---+	448298	0	5.734	7	0.5711
3	85551644	rs62253971	A	G	0.3874	0.0288	0.3874	A	6.974	0.0213812	0.00306584	3.071e-12	++++?+++-	448295	0	5.694	7	0.5759
3	85553324	rs2029131	A	C	0.3881	0.0291	0.3881	A	6.996	0.021442	0.0030649	2.642e-12	++++?+++-	448275	0	6.186	7	0.5182
3	85553596	rs2029132	A	C	0.6128	0.0285	0.3872	C	-7	-0.0214632	0.00306617	2.565e-12	----?---+	448283	0	6.266	7	0.5091
3	85553658	rs2029133	A	G	0.6129	0.0286	0.3871	G	-7.03	-0.0215562	0.00306632	2.059e-12	----?---+	448283	0	6.32	7	0.5029
3	85554722	rs62250463	T	G	0.3872	0.0286	0.3872	T	6.998	0.0214571	0.00306617	2.601e-12	++++?+++-	448283	0	6.311	7	0.504
3	85555008	rs1375544	A	G	0.3872	0.0285	0.3872	A	6.99	0.0214326	0.00306618	2.754e-12	++++?+++-	448281	0	6.254	7	0.5104
3	85555170	rs1375545	T	G	0.6128	0.0285	0.3872	G	-6.997	-0.021454	0.00306617	2.624e-12	----?---+	448283	0	6.41	7	0.4928
3	85555255	rs1375546	A	G	0.6131	0.0283	0.3869	G	-7.013	-0.0215062	0.00306661	2.327e-12	----?---+	448283	0	6.408	7	0.493
3	85555615	rs72615726	A	G	0.6126	0.0286	0.3874	G	-6.99	-0.0214305	0.00306588	2.753e-12	----?---+	448283	0	6.437	7	0.4897
3	85555773	rs17518584	T	C	0.6123	0.0291	0.3877	C	-7.029	-0.0215486	0.00306567	2.084e-12	----?---+	448219	0	6.628	7	0.4686
3	85555896	rs66631011	A	G	0.6115	0.0293	0.3885	G	-6.96	-0.0213343	0.00306527	3.403e-12	----?---+	447998	0	6.595	7	0.4723
3	85555911	rs68049270	T	C	0.6113	0.0294	0.3887	C	-6.947	-0.0212925	0.00306499	3.726e-12	----?---+	447995	0	6.534	7	0.4789
3	85556030	rs73133799	T	C	0.3873	0.0285	0.3873	T	6.941	0.0212835	0.00306634	3.897e-12	++++?+++-	448191	0	6.635	7	0.4678
3	85556033	rs73133800	T	C	0.6127	0.0285	0.3873	C	-6.951	-0.0213142	0.00306634	3.616e-12	----?---+	448191	0	6.668	7	0.4642
3	85556056	rs67568006	T	G	0.6127	0.0286	0.3873	G	-6.945	-0.0212957	0.00306634	3.779e-12	----?+--+	448192	0	6.668	7	0.4642
3	85556287	rs62250465	T	C	0.6123	0.0288	0.3877	C	-6.957	-0.0213263	0.00306545	3.473e-12	----?---+	448283	0	6.418	7	0.4919
3	85556853	rs6549039	A	G	0.3873	0.0284	0.3873	A	7.017	0.0215143	0.00306603	2.267e-12	++++?+++-	448282	0	6.545	7	0.4777
3	85556911	rs6549040	T	G	0.6127	0.0284	0.3873	G	-7.013	-0.0215021	0.00306603	2.329e-12	----?---+	448282	0	6.567	7	0.4753
3	85557370	rs4856275	A	C	0.6141	0.0274	0.3859	C	-7.125	-0.0218949	0.00307297	1.04e-12	----?---+	446859	0	5.777	7	0.566
3	85557371	rs4856586	T	G	0.3859	0.0274	0.3859	T	7.129	0.0219072	0.00307297	1.008e-12	++++?+++-	446859	0	5.79	7	0.5644
3	85557546	rs4856587	T	G	0.6122	0.0287	0.3878	G	-6.999	-0.0214563	0.00306562	2.574e-12	----?---+	448189	0	6.774	7	0.4528
3	85557597	rs4856277	A	G	0.3882	0.0289	0.3882	A	6.991	0.0214255	0.00306473	2.723e-12	++++?+++-	448282	0	6.619	7	0.4696
3	85557812	rs67277278	A	C	0.6119	0.0289	0.3881	C	-6.98	-0.0213942	0.00306507	2.957e-12	----?---+	448223	0	6.723	7	0.4583
3	85557853	rs4543024	T	C	0.3881	0.0289	0.3881	T	6.983	0.0214034	0.00306507	2.891e-12	++++?+++-	448223	0	6.725	7	0.4581
3	85557860	rs68028504	A	G	0.3881	0.029	0.3881	A	6.984	0.0214065	0.00306507	2.877e-12	++++?+++-	448223	0	6.726	7	0.4579
3	85557992	rs4441668	A	G	0.388	0.0289	0.388	A	6.996	0.0214435	0.00306511	2.626e-12	++++?+++-	448255	0	6.614	7	0.4701
3	85558011	rs1449370	T	C	0.612	0.0288	0.388	C	-6.991	-0.0214282	0.00306511	2.733e-12	----?---+	448255	0	6.62	7	0.4694
3	85558135	rs66499081	A	G	0.3881	0.0289	0.3881	A	6.968	0.0213575	0.00306508	3.205e-12	++++?+++-	448221	0	6.724	7	0.4582
3	85558173	rs1449371	T	C	0.3884	0.029	0.3884	T	6.95	0.0212993	0.00306464	3.645e-12	++++?+++-	448223	0	6.703	7	0.4604
3	85558243	rs66544515	A	G	0.612	0.0289	0.388	G	-6.983	-0.0214037	0.00306511	2.884e-12	----?---+	448255	0	6.585	7	0.4733
3	85558455	rs7653790	T	G	0.6124	0.0286	0.3876	G	-7.01	-0.0214905	0.00306569	2.385e-12	----?---+	448255	0	6.594	7	0.4724
3	85558989	rs724304	A	C	0.3873	0.0284	0.3873	A	7.051	0.0216193	0.00306613	1.78e-12	++++?+++-	448253	0	6.483	7	0.4846
3	85559049	rs1449372	T	G	0.3873	0.0284	0.3873	T	7.034	0.0215671	0.00306612	2.004e-12	++++?+++-	448256	0	6.511	7	0.4815
3	85559311	rs1449373	A	G	0.6124	0.0286	0.3876	G	-7.032	-0.0215579	0.00306568	2.033e-12	----?---+	448256	0	6.495	7	0.4833
3	85559337	rs1449374	T	C	0.6123	0.0286	0.3877	C	-7.038	-0.0215753	0.00306554	1.955e-12	----?---+	448256	0	6.472	7	0.4858
3	85559418	rs1449375	T	G	0.6123	0.0286	0.3877	G	-6.999	-0.0214557	0.00306554	2.586e-12	----?---+	448256	0	6.487	7	0.4842
3	85559681	rs1375548	A	C	0.441	0.0007	0.441	A	-5.594	-0.0217379	0.00388593	2.215e-08	??????--?	268633	19.8	1.247	1	0.2642
3	85559922	rs2167043	T	C	0.3884	0.0291	0.3884	T	7.045	0.0215897	0.00306455	1.851e-12	++++?+++-	448250	0	6.504	7	0.4823
3	85559945	rs2167044	T	C	0.6115	0.0291	0.3885	C	-7.044	-0.0215857	0.0030644	1.861e-12	----?---+	448250	0	6.504	7	0.4823
3	85560139	rs59073108	A	G	0.3868	0.028	0.3868	A	6.976	0.0213945	0.00306687	3.026e-12	++++?+++-	448250	0	6.504	7	0.4822
3	85560153	rs62250467	T	C	0.3868	0.028	0.3868	T	6.975	0.0213914	0.00306687	3.055e-12	++++?+++-	448250	0	6.509	7	0.4817
3	85560215	rs17459563	A	G	0.6104	0.0299	0.3896	G	-6.993	-0.0214184	0.00306283	2.694e-12	----?---+	448250	0	6.436	7	0.4899
3	85560262	rs77852438	T	C	0.6123	0.0286	0.3877	C	-7.002	-0.0214651	0.00306556	2.521e-12	----?---+	448250	0	6.491	7	0.4837
3	85560263	rs78288623	A	C	0.6123	0.0286	0.3877	C	-7.002	-0.0214651	0.00306556	2.521e-12	----?---+	448250	0	6.491	7	0.4837
3	85560645	rs1449378	T	C	0.6125	0.0285	0.3875	C	-7.022	-0.0215283	0.00306583	2.189e-12	----?---+	448256	0	6.438	7	0.4896
3	85560729	rs1449379	T	C	0.3875	0.0285	0.3875	T	7.011	0.0214945	0.00306583	2.368e-12	++++?+++-	448256	0	6.517	7	0.4808
3	85560933	rs1530738	A	G	0.3874	0.0284	0.3874	A	6.999	0.0214588	0.00306598	2.571e-12	++++?+++-	448256	0	6.547	7	0.4775
3	85561337	rs1530740	A	G	0.6126	0.0285	0.3874	G	-7.025	-0.0215385	0.00306598	2.137e-12	----?---+	448256	0	6.565	7	0.4756
3	85561499	rs17519241	T	C	0.6118	0.029	0.3882	C	-6.992	-0.0214292	0.00306482	2.709e-12	----?---+	448256	0	6.497	7	0.483
3	85561545	rs62250468	T	C	0.6116	0.0291	0.3884	C	-6.987	-0.0214119	0.00306453	2.809e-12	----?---+	448256	0	6.492	7	0.4836
3	85561575	rs17519262	A	G	0.3884	0.0291	0.3884	A	6.977	0.0213812	0.00306453	3.008e-12	++++?+++-	448256	0	6.497	7	0.4831
3	85561757	rs78015688	T	G	0.3875	0.0284	0.3875	T	6.984	0.0214118	0.00306584	2.87e-12	++++?+++-	448254	0	6.506	7	0.4821
3	85561826	rs2167045	A	G	0.6122	0.0287	0.3878	G	-6.988	-0.021421	0.00306539	2.798e-12	----?---+	448256	0	6.491	7	0.4838
3	85561918	rs2122233	A	G	0.6125	0.0285	0.3875	G	-6.992	-0.0214363	0.00306583	2.718e-12	----?---+	448256	0	6.55	7	0.4772
3	85561989	rs2122234	A	G	0.6125	0.0285	0.3875	G	-6.985	-0.0214148	0.00306583	2.842e-12	----?---+	448256	0	6.536	7	0.4787
3	85562270	rs4856588	A	G	0.6124	0.0286	0.3876	G	-6.973	-0.021377	0.00306568	3.102e-12	----?---+	448256	0	6.441	7	0.4893
3	85562410	rs4856589	A	G	0.3876	0.0286	0.3876	A	6.984	0.0214107	0.00306568	2.86e-12	++++?+++-	448256	0	6.521	7	0.4804
3	85562641	rs1900914	A	G	0.6125	0.0285	0.3875	G	-6.979	-0.0213964	0.00306583	2.98e-12	----?---+	448256	0	6.487	7	0.4841
3	85562753	rs1449380	T	C	0.6125	0.0285	0.3875	C	-6.989	-0.0214271	0.00306583	2.766e-12	----?---+	448256	0	6.525	7	0.48
3	85562892	rs1449381	A	G	0.3874	0.0284	0.3874	A	6.98	0.0214005	0.00306598	2.958e-12	++++?+++-	448256	0	6.472	7	0.4858
3	85562903	rs1449382	A	G	0.6126	0.0284	0.3874	G	-6.979	-0.0213974	0.00306598	2.981e-12	----?---+	448256	0	6.474	7	0.4856
3	85563378	rs4856590	A	G	0.6049	0.0194	0.3951	G	-6.785	-0.0207309	0.0030554	1.163e-11	----?---+	448202	0	5.888	7	0.5529
3	85563550	rs17459906	T	C	0.388	0.0288	0.388	T	7.003	0.0214655	0.00306519	2.502e-12	++++?+++-	448231	0	6.512	7	0.4814
3	85563580	rs4856592	A	G	0.6115	0.0292	0.3885	G	-7.011	-0.021485	0.00306447	2.372e-12	----?---+	448231	0	6.479	7	0.4851
3	85563598	rs62250472	A	C	0.6116	0.0291	0.3884	C	-6.999	-0.0214492	0.00306461	2.583e-12	----?---+	448231	0	6.516	7	0.4809
3	85563617	rs4856593	T	C	0.3886	0.0292	0.3886	T	6.979	0.0213859	0.00306433	2.97e-12	++++?+++-	448231	0	6.534	7	0.479
3	85564228	rs1375549	T	C	0.3876	0.0285	0.3876	T	6.987	0.0214223	0.00306602	2.805e-12	++++?+++-	448158	0	6.238	7	0.5122
3	85564230	rs1375550	A	G	0.3876	0.0285	0.3876	A	6.987	0.0214223	0.00306602	2.8e-12	++++?+++-	448158	0	6.238	7	0.5123
3	85564351	rs1375551	T	C	0.3881	0.0289	0.3881	T	6.964	0.021345	0.00306505	3.312e-12	++++?+++-	448231	0	6.448	7	0.4885
3	85564681	rs1449383	A	G	0.3876	0.0286	0.3876	A	6.961	0.0213402	0.00306568	3.386e-12	++++?+++-	448256	0	6.517	7	0.4808
3	85564841	rs1449385	T	C	0.3875	0.0285	0.3875	T	6.985	0.0214148	0.00306583	2.842e-12	++++?+++-	448256	0	6.522	7	0.4803
3	85565596	rs62250489	A	C	0.6124	0.0285	0.3876	C	-6.987	-0.0214199	0.00306568	2.803e-12	----?---+	448256	0	6.478	7	0.4851
3	85565784	rs62250490	T	C	0.6125	0.0285	0.3875	C	-6.988	-0.021424	0.00306583	2.791e-12	----?---+	448256	0	6.477	7	0.4852
3	85566033	rs7617306	T	C	0.6126	0.0285	0.3874	C	-6.972	-0.0213762	0.00306601	3.132e-12	----?---+	448246	0	6.582	7	0.4737
3	85566148	rs7629091	T	G	0.3875	0.0285	0.3875	T	6.967	0.0213599	0.00306586	3.246e-12	++++?+++-	448246	0	6.578	7	0.4741
3	85566859	rs62250491	T	G	0.6128	0.0283	0.3872	G	-6.961	-0.0213501	0.0030671	3.368e-12	----?---+	448013	0	6.273	7	0.5083
3	85566864	rs62250492	T	C	0.3872	0.0283	0.3872	T	6.96	0.021347	0.0030671	3.394e-12	++++?+++-	448013	0	6.29	7	0.5063
3	85566968	rs17519948	A	C	0.387	0.0284	0.387	A	7.003	0.0214755	0.00306661	2.514e-12	++++?+++-	448240	0	6.609	7	0.4707
3	85567659	rs1597315	T	C	0.6116	0.0294	0.3884	C	-6.976	-0.0213785	0.00306458	3.042e-12	----?---+	448240	0	6.586	7	0.4732
3	85568962	rs17460541	T	G	0.6124	0.0287	0.3876	G	-6.961	-0.0213406	0.00306574	3.385e-12	----?---+	448240	0	6.666	7	0.4645
3	85569158	rs1375555	T	C	0.3871	0.0284	0.3871	T	6.999	0.0214622	0.00306647	2.576e-12	++++?+++-	448240	0	6.607	7	0.4709
3	85569269	rs1375554	A	G	0.3871	0.0284	0.3871	A	6.994	0.0214469	0.00306647	2.679e-12	++++?+++-	448240	0	6.607	7	0.4709
3	85570494	rs59211082	T	C	0.387	0.0284	0.387	T	6.988	0.0214295	0.00306661	2.781e-12	++++?+++-	448240	0	6.602	7	0.4714
3	85570707	rs61316596	T	C	0.6129	0.0283	0.3871	C	-6.973	-0.0213825	0.00306647	3.094e-12	----?---+	448240	0	6.582	7	0.4736
3	85571331	rs59417256	T	G	0.3871	0.0283	0.3871	T	6.979	0.0214009	0.00306647	2.98e-12	++++?+++-	448240	0	6.615	7	0.47
3	85571471	rs62250496	T	G	0.6127	0.0282	0.3873	G	-6.983	-0.0214111	0.00306618	2.893e-12	----?---+	448240	0	6.605	7	0.4712
3	85571860	rs57276248	A	G	0.3872	0.0283	0.3872	A	6.988	0.0214275	0.00306632	2.785e-12	++++?+++-	448240	0	6.605	7	0.4711
3	85572055	rs59835020	A	G	0.3872	0.0283	0.3872	A	6.987	0.0214244	0.00306632	2.812e-12	++++?+++-	448240	0	6.605	7	0.4711
3	85572781	rs7616458	T	C	0.3871	0.0283	0.3871	T	6.983	0.0214131	0.00306647	2.881e-12	++++?+++-	448240	0	6.631	7	0.4683
3	85574121	rs17460701	T	C	0.6128	0.0283	0.3872	C	-6.989	-0.0214305	0.00306632	2.772e-12	----?---+	448240	0	6.632	7	0.4682
3	85575039	rs6790699	A	G	0.387	0.0282	0.387	A	6.954	0.0213253	0.00306663	3.562e-12	++++?+++-	448235	0	6.549	7	0.4773
3	85575236	rs4856596	T	G	0.6127	0.0283	0.3873	G	-6.914	-0.0211995	0.00306618	4.703e-12	----?---+	448240	0	6.571	7	0.4748
3	85575411	rs6766690	T	C	0.6125	0.0284	0.3875	C	-6.941	-0.0212803	0.00306588	3.88e-12	----?---+	448240	0	6.595	7	0.4723
3	85576081	rs67904150	A	G	0.3873	0.0283	0.3873	A	6.941	0.0212823	0.00306618	3.881e-12	++++?+++-	448240	0	6.599	7	0.4718
3	85576904	rs7617356	T	C	0.6128	0.0282	0.3872	C	-6.938	-0.0212743	0.00306635	3.985e-12	----?---+	448233	0	6.617	7	0.4698
3	85578541	rs62250500	T	C	0.6126	0.0283	0.3874	C	-6.905	-0.0211709	0.00306603	5.01e-12	----?---+	448240	0	6.599	7	0.4718
3	85579538	rs6762535	A	G	0.6127	0.0283	0.3873	G	-6.996	-0.0214663	0.00306837	2.64e-12	----?---+	447599	0	6.203	7	0.5163
3	85579715	rs6762733	A	G	0.6127	0.0283	0.3873	G	-6.999	-0.0214755	0.00306837	2.574e-12	----?---+	447599	0	6.184	7	0.5184
3	85580105	rs6549042	A	G	0.3873	0.0283	0.3873	A	6.994	0.0214602	0.00306837	2.665e-12	++++?+++-	447599	0	6.195	7	0.5171
3	85583282	rs6549044	A	G	0.3873	0.0283	0.3873	A	6.992	0.021454	0.00306837	2.716e-12	++++?+++-	447599	0	6.345	7	0.5001
3	85585175	rs62250502	A	G	0.3892	0.0295	0.3892	A	6.927	0.0212436	0.00306678	4.312e-12	++++?+++-	447263	2.7	7.191	7	0.4093
3	85585976	rs1375557	T	G	0.6126	0.0283	0.3874	G	-6.973	-0.0213947	0.00306822	3.106e-12	----?---+	447599	0	6.351	7	0.4994
3	85586040	rs1375558	A	G	0.3874	0.0283	0.3874	A	6.978	0.0214101	0.00306822	3e-12	++++?+++-	447599	0	6.336	7	0.5011
3	85587271	rs7634761	A	G	0.6127	0.0282	0.3873	G	-6.999	-0.0214755	0.00306837	2.581e-12	----?---+	447598	0	6.438	7	0.4897
3	85587478	rs4508796	A	G	0.3873	0.0283	0.3873	A	6.99	0.0214479	0.00306837	2.742e-12	++++?+++-	447599	0	6.392	7	0.4948
3	85591268	rs68001049	A	G	0.387	0.028	0.387	A	6.959	0.0213571	0.00306899	3.431e-12	++++?+++-	447547	0	6.201	7	0.5165
3	85592675	rs11919099	T	G	0.613	0.0282	0.387	G	-6.976	-0.0214092	0.00306898	3.035e-12	----?---+	447548	0	6.183	7	0.5185
3	85593731	rs1375565	A	G	0.3871	0.0282	0.3871	A	6.96	0.0213591	0.00306884	3.413e-12	++++?+++-	447548	0	6.239	7	0.5121
3	85595907	rs62250540	T	C	0.613	0.0282	0.387	C	-7.026	-0.0215856	0.00307225	2.132e-12	----?---?	446598	0	2.182	6	0.9023
3	85598464	rs62263910	T	G	0.6131	0.0284	0.3869	G	-7.048	-0.021653	0.00307222	1.816e-12	----?---?	446649	0	2.371	6	0.8826
3	85599096	rs62263912	A	G	0.6129	0.0284	0.3871	G	-7.043	-0.0216356	0.00307192	1.877e-12	----?---?	446649	0	2.427	6	0.8765
3	85600048	rs956281	T	G	0.3869	0.0285	0.3869	T	7.044	0.0216407	0.00307222	1.863e-12	++++?+++?	446649	0	2.444	6	0.8747
3	85601986	rs34495106	A	G	0.3862	0.0285	0.3862	A	7.03	0.0216069	0.00307352	2.069e-12	++++?+++?	446569	0	2.245	6	0.8959
3	85604310	rs10511073	A	G	0.3456	0.0398	0.3456	A	5.675	0.018513	0.0032622	1.383e-08	+?++?-++?	415492	0	3.324	5	0.6501
3	85607072	rs9812845	A	C	0.7582	0.0042	0.2418	C	-6.218	-0.0217429	0.00349677	5.045e-10	----?---?	446094	0	0.805	6	0.9919
3	85607161	rs1375564	T	C	0.6387	0.0435	0.3613	C	-5.691	-0.0183791	0.00322951	1.261e-08	-?--?+--?	415492	0	3.501	5	0.6233
3	85607939	rs12635683	A	G	0.2413	0.0045	0.2413	A	6.219	0.0217617	0.00349923	4.993e-10	++++?+++?	446094	0	0.872	6	0.99
3	85608508	rs4856600	A	C	0.3438	0.0396	0.3438	A	5.767	0.0188364	0.00326624	8.085e-09	+?++?-++?	415492	0	3.583	5	0.6108
3	85609875	rs7632056	A	G	0.361	0.0437	0.361	A	5.716	0.0184632	0.00323009	1.094e-08	+?++?-++?	415492	0	3.642	5	0.6021
3	85613775	rs11127903	T	G	0.2413	0.0046	0.2413	T	6.169	0.0215868	0.00349923	6.884e-10	++++?+++?	446094	0	0.912	6	0.9887
3	85613947	rs62263915	T	C	0.639	0.0437	0.361	C	-5.722	-0.0184826	0.00323009	1.05e-08	-?--?+--?	415492	0	3.688	5	0.5951
3	85614699	rs6779752	A	G	0.6413	0.0448	0.3587	G	-5.645	-0.0182594	0.00323461	1.653e-08	-?--?+--?	415492	0	3.899	5	0.5641
3	85616351	rs6799195	T	C	0.3451	0.0401	0.3451	T	5.832	0.0190316	0.00326331	5.463e-09	+?++?-++?	415492	0	3.634	5	0.6033
3	85617467	rs9880010	T	C	0.2412	0.0045	0.2412	T	6.211	0.0217368	0.00349972	5.279e-10	++++?+++?	446096	0	0.917	6	0.9886
3	85618436	rs1449396	A	G	0.2414	0.0046	0.2414	A	6.24	0.0218321	0.00349873	4.383e-10	++++?+++?	446096	0	0.933	6	0.988
3	85618533	rs1449395	A	C	0.2398	0.0043	0.2398	A	6.227	0.0218351	0.00350651	4.763e-10	++++?+++?	446141	0	0.966	6	0.9869
3	85618696	rs62263916	T	G	0.64	0.0435	0.36	G	-5.63	-0.0181964	0.00323205	1.802e-08	-?--?+--?	415492	0	3.857	5	0.5702
3	85618778	rs62263917	A	G	0.3432	0.0392	0.3432	A	5.796	0.018939	0.0032676	6.793e-09	+?++?-++?	415492	0	3.689	5	0.595
3	85618788	rs62263918	A	G	0.3605	0.0433	0.3605	A	5.79	0.0187079	0.00323107	7.05e-09	+?++?-++?	415492	0	3.619	5	0.6054
3	85618902	rs67391933	A	G	0.344	0.0398	0.344	A	5.758	0.0188044	0.00326578	8.533e-09	+?++?-++?	415492	0	3.824	5	0.575
3	85619089	rs17521052	A	G	0.361	0.0437	0.361	A	5.729	0.0185052	0.00323009	1.009e-08	+?++?-++?	415492	0	3.746	5	0.5866
3	85619420	rs11923343	A	G	0.3598	0.0434	0.3598	A	5.656	0.0182827	0.00323244	1.549e-08	+?++?-++?	415492	0	3.719	5	0.5905
3	85620076	rs9816536	A	G	0.3429	0.0413	0.3429	A	5.903	0.0192927	0.00326828	3.58e-09	+?++?-++?	415492	0	3.482	5	0.6261
3	85620533	rs7627780	A	G	0.3439	0.042	0.3439	A	5.867	0.0191617	0.00326601	4.447e-09	+?++?-++?	415492	0	3.628	5	0.6041
3	85620629	rs6549046	T	G	0.6397	0.046	0.3603	G	-5.739	-0.0185453	0.00323146	9.538e-09	-?--?+--?	415492	0	3.692	5	0.5945
3	85621969	rs9826759	T	C	0.3438	0.0419	0.3438	T	5.858	0.0191336	0.00326624	4.676e-09	+?++?-++?	415492	0	3.6	5	0.6083
3	85622759	rs9831610	T	C	0.3437	0.0418	0.3437	T	5.857	0.0191317	0.00326646	4.703e-09	+?++?-++?	415492	0	3.646	5	0.6015
3	85623785	rs9836967	A	C	0.2414	0.0046	0.2414	A	6.277	0.0219615	0.00349873	3.456e-10	++++?+++?	446096	0	0.904	6	0.989
3	85625222	rs7643091	A	G	0.2507	0.0078	0.2507	A	6.273	0.0214294	0.00341614	3.544e-10	++++-+++?	456162	0	3.006	7	0.8845
3	85625508	rs13082188	T	C	0.7558	0.0052	0.2442	C	-6.248	-0.0215294	0.00344581	4.145e-10	-----+--?	456316	0	1.187	7	0.9912
3	85628687	rs35326689	A	G	0.7569	0.0047	0.2431	G	-6.267	-0.0218763	0.00349072	3.683e-10	----?+--?	446012	0	0.791	6	0.9923
3	89412213	rs73137382	C	G	0.7963	0.0052	0.2037	G	-5.882	-0.0278475	0.00473437	4.065e-09	??++?---?	275048	15.4	4.729	4	0.3162
3	89460400	rs112087049	T	G	0.2036	0.0005	0.2036	T	5.477	0.0248057	0.00452906	4.326e-08	?+????+++	300659	23.4	3.916	3	0.2706
3	89469314	rs1912966	A	T	0.208	0.0047	0.208	A	5.55	0.0246475	0.004441	2.863e-08	?+--?++++	307787	2	6.124	6	0.4095
3	89473113	rs73139118	A	T	0.7931	0.0046	0.2069	T	-5.527	-0.0245952	0.00445	3.253e-08	?-++?----	307745	9.3	6.619	6	0.3576
3	89475286	rs73139127	A	T	0.2093	0.0048	0.2093	A	5.537	0.0245333	0.00443079	3.081e-08	?+--?++++	307792	0	5.96	6	0.4277
3	89475412	rs73139129	A	G	0.7907	0.0004	0.2093	G	-5.644	-0.0252726	0.00447778	1.662e-08	?-????---	301366	0	2.914	3	0.4051
3	89476147	rs112335559	A	T	0.7907	0.0048	0.2093	T	-5.519	-0.0244535	0.00443079	3.408e-08	?-++?----	307792	3.3	6.206	6	0.4005
3	89476922	rs1499780	C	G	0.2097	0.0049	0.2097	C	5.54	0.0245275	0.00442735	3.022e-08	?+--?++++	307838	2.3	6.143	6	0.4074
3	89491122	rs369052772	A	T	0.2271	0.0003	0.2271	A	5.636	0.0245099	0.00434881	1.743e-08	?+????+++	301244	0	2.063	3	0.5593
3	89495623	rs7613315	C	G	0.2265	0.0047	0.2265	C	5.48	0.0236022	0.00430696	4.263e-08	?+--?++++	307701	1.9	6.119	6	0.41
4	39369476	rs62310771	T	C	0.5424	0.0609	0.4576	C	-5.631	-0.016913	0.00300355	1.794e-08	--+-?---?	446607	52.5	12.634	6	0.04923
4	39373709	rs62310772	T	C	0.5424	0.0615	0.4576	C	-5.715	-0.0171624	0.00300305	1.098e-08	--+-?---?	446754	50.2	12.036	6	0.06117
4	39375785	rs13123782	A	C	0.5496	0.0592	0.4504	C	-5.576	-0.0167411	0.00300235	2.459e-08	--+-?----	448160	34.5	10.689	7	0.1528
4	39376838	rs6531714	T	C	0.5427	0.0616	0.4573	C	-5.707	-0.0171397	0.00300328	1.153e-08	--+-?---?	446733	45.8	11.071	6	0.0862
4	39390320	rs10033019	A	G	0.571	0.0504	0.429	G	-5.506	-0.0170507	0.00309675	3.672e-08	-?+-+---?	425692	63.6	16.465	6	0.01147
4	39392181	rs6842066	T	C	0.4565	0.063	0.4565	T	5.79	0.017816	0.00307703	7.055e-09	+?---+++?	425692	62.6	16.053	6	0.01347
4	39394010	rs2381376	A	T	0.4912	0.011	0.4912	A	6.619	0.0247901	0.00374529	3.614e-11	??---+++?	285248	47.6	9.542	5	0.08931
4	39396050	rs7662509	A	G	0.5135	0.0681	0.4865	G	-6.433	-0.0199674	0.00310389	1.251e-10	-?++?---?	415492	66.1	14.746	5	0.0115
4	39397005	rs6857705	T	C	0.5568	0.0599	0.4432	C	-6.206	-0.0184766	0.00297721	5.441e-10	--+++---?	457174	64.3	19.614	7	0.006467
4	39397784	rs12643682	T	C	0.5533	0.0609	0.4467	C	-6.26	-0.0186266	0.0029755	3.84e-10	--+++---?	456986	64.3	19.626	7	0.006436
4	39399378	rs13110790	A	G	0.4446	0.0603	0.4446	A	6.303	0.018756	0.00297573	2.926e-10	++---+++?	457338	63.8	19.364	7	0.007121
4	39400905	rs7661596	T	C	0.4347	0.0576	0.4347	T	6.382	0.0190461	0.00298435	1.744e-10	++---+++?	456910	62.8	18.798	7	0.008844
4	39401125	rs7686103	A	G	0.5655	0.0577	0.4345	G	-6.441	-0.0192236	0.00298457	1.189e-10	--+++---?	456892	62.7	18.789	7	0.008876
4	39402111	rs33968162	T	C	0.4433	0.0598	0.4433	T	6.273	0.0186694	0.00297615	3.545e-10	++---+++?	457480	64	19.429	7	0.006945
4	39402403	rs11937539	T	G	0.4768	0.0009	0.4768	T	7.345	0.0268557	0.00365633	2.054e-13	?+????++?	299851	25.5	2.683	2	0.2615
4	39402686	rs2381379	T	C	0.4346	0.0576	0.4346	T	6.358	0.018975	0.00298443	2.047e-10	++---+++?	456910	63.6	19.252	7	0.007435
4	39402955	rs67152983	A	G	0.4344	0.0574	0.4344	A	6.643	0.0200517	0.00301847	3.074e-11	++--?+++?	446710	58.9	14.596	6	0.02364
4	39403252	rs13129401	A	G	0.5653	0.0574	0.4347	G	-6.42	-0.0191596	0.00298435	1.36e-10	--+++---?	456910	62	18.439	7	0.01014
4	39403531	rs13135439	T	G	0.5636	0.0559	0.4364	G	-6.762	-0.0204006	0.00301695	1.358e-11	--++?---?	446691	57.6	14.167	6	0.02783
4	39403620	rs13130101	A	T	0.5242	0.0107	0.4758	T	-6.984	-0.0248595	0.0035595	2.875e-12	?-+++---?	316447	44.5	10.802	6	0.0947
4	39404750	rs7686419	A	G	0.4375	0.0592	0.4375	A	6.593	0.0206182	0.00312729	4.324e-11	+?--?+++?	415492	64.2	13.966	5	0.01582
4	39404797	rs7687811	C	G	0.5224	0.0109	0.4776	G	-7.08	-0.0265392	0.00374848	1.446e-12	??+++---?	285248	48.6	9.724	5	0.08346
4	39404870	rs7686610	A	G	0.4365	0.0582	0.4365	A	6.343	0.0196023	0.00309039	2.252e-10	+?---+++?	425692	68.3	18.948	6	0.004252
4	39405367	rs13149518	T	C	0.557	0.0594	0.443	C	-6.235	-0.019238	0.00308548	4.528e-10	-?+++---?	425692	69	19.359	6	0.003599
4	39412160	rs28712821	A	G	0.4326	0.0967	0.4326	A	7.052	0.0218161	0.0030936	1.758e-12	+?++-+++?	425692	82	33.295	6	9.202e-06
4	39413373	rs11940694	A	G	0.5626	0.0951	0.4374	G	-7.728	-0.023877	0.00308968	1.096e-14	-?--+---?	425692	81.9	33.223	6	9.499e-06
4	39417345	rs35538052	A	G	0.467	0.0651	0.467	A	-6.149	-0.0191206	0.00310954	7.782e-10	+?--?---?	415492	79.1	23.972	5	0.0002198
4	39419361	rs12639940	A	G	0.5259	0.0622	0.4741	G	6.193	0.0192412	0.00310693	5.888e-10	-?+-?+++?	415492	80.7	25.909	5	9.294e-05
4	39420622	rs13130794	T	C	0.5259	0.0622	0.4741	C	6.181	0.019204	0.00310693	6.377e-10	-?++?+++?	415492	80.7	25.861	5	9.497e-05
4	39420704	rs13125440	A	G	0.5259	0.0621	0.4741	G	6.18	0.0192009	0.00310693	6.405e-10	-?++?+++?	415492	80.6	25.78	5	9.842e-05
4	39422169	rs4975013	A	G	0.4687	0.064	0.4687	A	-6.291	-0.0195578	0.00310886	3.15e-10	+?--?---?	415492	80.6	25.715	5	0.0001013
4	39423628	rs13146907	A	G	0.5286	0.064	0.4714	G	6.647	0.0198976	0.00299347	2.982e-11	-+++?+++-	447850	76.1	29.326	7	0.0001262
4	96065141	rs139475172	A	G	0.9839	0.001	0.0161	G	6.44	0.0756925	0.0117535	1.191e-10	++---+++?	456972	44.5	12.608	7	0.08224
4	96066520	rs114556496	A	G	0.983	0.0009	0.017	G	6.808	0.0779022	0.0114427	9.929e-12	++---+++?	457022	51.8	14.52	7	0.04267
4	96073111	rs113705826	A	C	0.0196	0.0053	0.0196	A	-6.697	-0.0723161	0.0107983	2.121e-11	----?---?	446305	0	4.223	6	0.6465
4	96171112	rs191543804	A	G	0.9844	0.0041	0.0156	G	6.745	0.0814046	0.0120689	1.526e-11	++-+?+++?	447064	0	3.799	6	0.7039
4	96181737	rs78895189	A	G	0.0158	0.0042	0.0158	A	-6.435	-0.0763128	0.011859	1.234e-10	--+-+---?	457258	0	6.018	7	0.5377
4	96190165	rs141584796	A	G	0.016	0.0043	0.016	A	-6.376	-0.0751467	0.0117859	1.821e-10	--+-+---?	457258	0	6.089	7	0.5294
4	96228591	rs114444478	A	C	0.0158	0.0041	0.0158	A	-6.354	-0.0753568	0.0118597	2.099e-10	--+-+---?	457203	0	6.338	7	0.5009
4	96232020	rs79186858	A	G	0.9674	0.01	0.0326	G	5.457	0.0459653	0.00842318	4.842e-08	+-++?++++	446914	0	3.715	7	0.8119
4	96246536	rs17025247	T	C	0.0234	0.0067	0.0234	T	-5.741	-0.0568444	0.00990148	9.396e-09	-+--?---?	446341	24.1	7.909	6	0.2449
4	96257639	rs114537171	A	G	0.9842	0.0041	0.0158	G	6.421	0.0761579	0.0118608	1.35e-10	++-+-+++?	457125	0	6.006	7	0.539
4	96266492	rs189185784	A	G	0.0091	0.0008	0.0091	A	-7.029	-0.111336	0.0158396	2.083e-12	--???---?	442019	17.7	4.862	4	0.3017
4	96270309	rs149005016	A	G	0.0091	0.0008	0.0091	A	-7.009	-0.11102	0.0158396	2.404e-12	--???---?	442019	17.4	4.84	4	0.3041
4	96297486	rs116683839	T	C	0.0177	0.0012	0.0177	T	-5.887	-0.0660366	0.0112174	3.93e-09	--+++---?	457089	0	5.96	7	0.5444
4	96297619	rs149222890	T	C	0.9842	0.004	0.0158	C	6.322	0.0749894	0.0118617	2.576e-10	++-+-+++?	457055	0	6.58	7	0.4739
4	96326794	rs143148614	A	G	0.011	0.0008	0.011	A	-6.948	-0.100214	0.0144235	3.694e-12	--???---?	441845	0	3.933	4	0.4151
4	96328531	rs17025385	T	G	0.9776	0.0064	0.0224	G	6.36	0.0643401	0.0101164	2.02e-10	++++?+++?	446213	0	3.345	6	0.7645
4	96342915	rs190707297	C	G	0.9909	0.0008	0.0091	G	5.547	0.106379	0.0191778	2.904e-08	?+???+++?	301530	44.1	5.363	3	0.1471
4	96354707	rs111717904	T	G	0.0286	0.0086	0.0286	T	-5.562	-0.0510878	0.00918515	2.662e-08	-?--+----	426642	0	3.644	7	0.8198
4	96360881	rs17025434	A	G	0.9776	0.0066	0.0224	G	6.339	0.0641425	0.0101187	2.314e-10	++++?+++?	446006	0	3.868	6	0.6946
4	96401257	rs138138908	A	C	0.01	0.0008	0.01	A	-6.927	-0.104723	0.0151181	4.299e-12	--???---?	441950	3.7	4.154	4	0.3856
4	96483127	rs138088321	A	C	0.9824	0.0012	0.0176	C	6.43	0.072339	0.0112502	1.273e-10	++-+-+++?	456958	1.7	7.119	7	0.4166
4	96525461	rs148887968	T	C	0.9902	0.0008	0.0098	C	6.685	0.102113	0.015275	2.311e-11	+-???+++?	441663	36.5	6.299	4	0.1779
4	96575968	rs181004160	A	G	0.0073	0.0004	0.0073	A	-7.066	-0.125074	0.0177008	1.593e-12	--????--?	440425	0	1.411	3	0.703
4	96709408	rs193132902	A	G	0.9894	0.0011	0.0106	G	9.712	0.142643	0.0146873	2.671e-22	++???+++?	442014	50.7	8.12	4	0.08726
4	96771967	rs184125963	T	C	0.9911	0.0012	0.0089	C	9.405	0.150658	0.0160189	5.209e-21	++???+++?	441799	69.8	13.26	4	0.01007
4	96842917	rs140637557	A	G	0.0155	0.0036	0.0155	A	-8.743	-0.105068	0.0120174	2.277e-18	--?-+---?	453768	51.4	12.358	6	0.05445
4	96929682	rs184508640	T	C	0.9888	0.0009	0.0112	C	9.565	0.13671	0.0142927	1.117e-21	++???+++?	442021	71.5	14.059	4	0.00711
4	96932729	rs143118954	A	T	0.0112	0.0009	0.0112	A	-9.208	-0.159332	0.0173036	3.324e-20	?-???---?	301577	65.6	8.722	3	0.03322
4	96968793	rs141022549	A	G	0.9886	0.0009	0.0114	G	9.713	0.137616	0.0141682	2.657e-22	++???+++?	442024	68	12.492	4	0.01404
4	96970343	rs7685670	A	G	0.0378	0.0114	0.0378	A	-6.324	-0.0490874	0.00776208	2.542e-10	----+---?	456338	56.1	15.958	7	0.0255
4	97027672	rs140572477	A	G	0.0122	0.0012	0.0122	A	-10.035	-0.137512	0.0137033	1.073e-23	--???---?	441899	65.4	11.562	4	0.02092
4	97097223	rs143385959	A	G	0.0299	0.0083	0.0299	A	-6.352	-0.055837	0.00879046	2.127e-10	--++?---?	446158	57.5	14.134	6	0.02818
4	97130086	rs147071310	A	C	0.0118	0.0012	0.0118	A	-10.102	-0.140742	0.0139321	5.386e-24	--???---?	441814	63.5	10.971	4	0.02689
4	97173558	rs191308852	T	C	0.9967	0.0001	0.0033	C	6.067	0.193139	0.0318343	1.3e-09	?+????++?	300007	42	3.446	2	0.1785
4	97437370	rs13125041	A	G	0.0395	0.0006	0.0395	A	-5.82	-0.0576496	0.00990542	5.888e-09	??????--?	268633	0	0.778	1	0.3779
4	97452667	rs143475242	T	C	0.0128	0.0004	0.0128	T	-9.864	-0.132213	0.0134036	5.966e-23	--????--?	440495	66.6	8.97	3	0.02969
4	97473588	rs138283763	T	C	0.0119	0.0004	0.0119	T	-10.325	-0.143475	0.0138959	5.436e-25	--????--?	440433	64.1	8.365	3	0.03904
4	97495091	rs192351584	A	G	0.9973	0.0001	0.0027	G	5.742	0.201932	0.0351676	9.349e-09	?+????++?	300279	70.7	6.83	2	0.03287
4	97510453	rs78272027	T	C	0.0345	0.0088	0.0345	T	-6.694	-0.0569008	0.00850028	2.17e-11	-?++?---?	415492	43.6	8.869	5	0.1144
4	97531741	rs144502847	A	T	0.0113	0.0004	0.0113	A	-9.885	-0.170735	0.0172721	4.843e-23	?-????--?	300031	39.5	3.307	2	0.1914
4	97541726	rs13151946	T	C	0.0626	0.0156	0.0626	T	-5.688	-0.0359884	0.00632707	1.285e-08	-?+++---?	425692	69.4	19.615	6	0.003242
4	97565845	rs537715653	T	G	0.9898	0.0004	0.0102	G	8.351	0.151789	0.0181762	6.771e-17	?+????++?	299810	0	0.586	2	0.7461
4	97607558	rs145329623	A	G	0.9882	0.0004	0.0118	G	10.28	0.143443	0.0139536	8.661e-25	++????++?	440454	63.7	8.266	3	0.04082
4	97621828	rs36091527	T	C	0.0351	0.0092	0.0351	T	-6.999	-0.0590011	0.00842993	2.585e-12	-?++?---?	415492	45.1	9.108	5	0.1048
4	97664412	rs12186262	T	G	0.9651	0.0091	0.0349	G	6.951	0.058758	0.00845317	3.636e-12	+?--?+++?	415492	46.2	9.296	5	0.09782
4	97673484	rs148357035	T	C	0.9887	0.0004	0.0113	C	10.234	0.14589	0.0142554	1.391e-24	++????++?	440451	63.7	8.266	3	0.04083
4	97701512	rs34206317	C	G	0.9607	0.0006	0.0393	G	5.516	0.0547715	0.00992956	3.472e-08	??????++?	268633	65.9	2.93	1	0.08697
4	97728650	rs34943109	T	C	0.9648	0.0094	0.0352	C	6.914	0.0582047	0.00841838	4.718e-12	+?--?+++?	415492	48.5	9.701	5	0.08415
4	97818489	rs13103769	T	C	0.0348	0.0094	0.0348	T	-6.97	-0.0590002	0.00846487	3.159e-12	-?++?---?	415492	47.9	9.595	5	0.08756
4	97823834	rs150955800	A	T	0.0118	0.0004	0.0118	A	-9.768	-0.165163	0.0169086	1.549e-22	?-????--?	299957	29.4	2.834	2	0.2424
4	97827128	rs138294646	C	G	0.9873	0.0004	0.0127	G	9.514	0.155134	0.0163059	1.843e-21	?+????++?	299957	29.5	2.835	2	0.2423
4	97910626	rs181634069	T	C	0.003	0.0001	0.003	T	-5.955	-0.198697	0.0333665	2.6e-09	?-????--?	300305	69.1	6.463	2	0.03951
4	98039391	rs142038534	T	C	0.9887	0.0004	0.0113	C	10.087	0.143794	0.0142553	6.314e-24	++????++?	440455	71.7	10.613	3	0.01401
4	98062910	rs140974931	A	T	0.0115	0.0004	0.0115	A	-9.499	-0.16267	0.0171249	2.109e-21	?-????--?	299963	61.6	5.209	2	0.07393
4	98107958	rs138081390	T	C	0.9878	0.0005	0.0122	C	10.189	0.139849	0.0137255	2.211e-24	++????++?	440467	63.9	8.322	3	0.03981
4	98134480	rs184709833	A	G	0.004	0.0001	0.004	A	-7.386	-0.213539	0.0289114	1.51e-13	?-????--?	300292	59.4	4.931	2	0.08498
4	98179856	rs149127347	T	G	0.9877	0.0005	0.0123	G	10.348	0.141462	0.0136704	4.28e-25	++????++?	440458	70.1	10.03	3	0.01831
4	98240201	rs140184756	A	G	0.988	0.0005	0.012	G	10.424	0.144248	0.0138381	1.929e-25	++????++?	440462	69.2	9.737	3	0.02093
4	98325886	rs437282	A	G	0.9391	0.0176	0.0609	G	5.798	0.0358376	0.00618103	6.698e-09	++---++++	457667	12.8	9.174	8	0.3278
4	98331026	rs378123	A	G	0.0616	0.0181	0.0616	A	-6.115	-0.0380234	0.00621805	9.632e-10	--++?----	447428	0	4.125	7	0.7653
4	98346006	rs148037510	A	G	0.9885	0.0013	0.0115	G	10.569	0.149123	0.0141095	4.127e-26	++???+++?	441878	69.4	13.075	4	0.01092
4	98347798	rs10028330	T	C	0.9249	0.0146	0.0751	C	5.627	0.0321179	0.00570782	1.835e-08	++????+++	441900	17.6	4.852	4	0.3028
4	98379287	rs141300829	A	C	0.9885	0.0013	0.0115	C	10.538	0.148682	0.0141091	5.794e-26	++???+++?	441904	68.3	12.63	4	0.01323
4	98421919	rs7669559	T	C	0.0672	0.0134	0.0672	T	-5.761	-0.0359346	0.00623756	8.36e-09	-?????---	410027	0	0.886	3	0.8289
4	98486522	rs35047075	T	C	0.9388	0.0176	0.0612	C	6.037	0.0390731	0.00647227	1.569e-09	+?--?+++?	415492	0	4.369	5	0.4976
4	98516868	rs184703805	A	G	0.0041	0.0001	0.0041	A	-7.79	-0.222477	0.0285593	6.727e-15	?-????--?	300265	51.4	4.117	2	0.1277
4	98543945	rs143092959	A	G	0.9881	0.0017	0.0119	G	12.439	0.172577	0.0138738	1.609e-35	++???+++?	441834	65.7	11.664	4	0.02003
4	98578691	rs846008	A	C	0.9944	0.0003	0.0056	C	6.203	0.160379	0.0258551	5.544e-10	??????++?	268633	0	0.192	1	0.6614
4	98622575	rs846016	A	T	0.986	0.0003	0.014	T	6.604	0.106447	0.0161185	4.003e-11	????+?++?	278833	0	1.258	2	0.5332
4	98636615	rs846004	A	T	0.9885	0.0005	0.0115	T	8.814	0.148488	0.0168468	1.207e-18	?+??+?++?	309950	0	2.909	3	0.4059
4	98646075	rs1919208	T	C	0.9857	0.0036	0.0143	C	9.496	0.119174	0.0125499	2.171e-21	++??+?++?	450442	1.1	4.042	4	0.4003
4	98646767	rs114026228	T	C	0.9786	0.0019	0.0214	C	17.535	0.181457	0.0103483	7.731e-69	+++-?+++?	445909	76	25.005	6	0.0003407
4	98651572	rs4699663	T	G	0.9858	0.004	0.0142	G	10.787	0.137394	0.012737	3.954e-27	++????++?	440339	22.9	3.891	3	0.2734
4	98689442	rs62325464	A	T	0.0292	0.002	0.0292	A	-5.566	-0.0588101	0.010566	2.611e-08	?-+-+---?	315987	8	6.522	6	0.3674
4	98708866	rs193099203	T	C	0.0236	0.0029	0.0236	T	-17.497	-0.172612	0.00986526	1.501e-68	---+?---?	445906	82.8	34.847	6	4.614e-06
4	98711171	rs4146003	A	G	0.5523	0.0613	0.4477	G	5.831	0.018192	0.00311988	5.519e-09	+?++?+++?	415492	18.6	6.141	5	0.2928
4	98723015	rs62325470	T	C	0.0137	0.0005	0.0137	T	-9.454	-0.120918	0.0127901	3.26e-21	--?++?--?	452399	13	5.745	5	0.3318
4	98765343	rs2178126	A	G	0.9706	0.0076	0.0294	G	5.896	0.0516588	0.00876167	3.713e-09	++---+++?	456498	27.3	9.625	7	0.2108
4	98769896	rs71612659	A	G	0.0595	0.0135	0.0595	A	-11.716	-0.0768352	0.00655814	1.059e-31	-?-+?---?	415492	50.7	10.14	5	0.07137
4	98780863	rs2866027	T	C	0.0294	0.0076	0.0294	T	-6.067	-0.0531513	0.00876072	1.304e-09	--+++---?	456597	29.5	9.934	7	0.1924
4	98783016	rs2141284	A	G	0.0117	0.0005	0.0117	A	-10.57	-0.146141	0.013826	4.121e-26	--?++?--?	452411	27.4	6.885	5	0.2293
4	98792199	rs144198753	T	C	0.0246	0.0027	0.0246	T	-19.713	-0.190583	0.00966791	1.669e-86	---+?---?	445879	79.7	29.545	6	4.797e-05
4	98799985	rs35680032	A	T	0.0653	0.0011	0.0653	A	-5.815	-0.04488	0.00771797	6.056e-09	??--?+--?	275048	16	4.76	4	0.3128
4	98805164	rs1918741	T	C	0.0671	0.0058	0.0671	T	-5.622	-0.0348603	0.00620069	1.893e-08	-?--?+--?	415492	59.5	12.342	5	0.03039
4	98806071	rs143653868	A	C	0.0671	0.0058	0.0671	A	-5.62	-0.0348479	0.00620069	1.906e-08	-?--?+--?	415492	59.5	12.35	5	0.03029
4	98808017	rs1918739	C	G	0.0665	0.0011	0.0665	C	-5.95	-0.0455349	0.00765293	2.677e-09	??--?+--?	275048	15.2	4.719	4	0.3173
4	98808585	rs62323700	A	G	0.0693	0.0054	0.0693	A	-5.502	-0.0336099	0.00610868	3.754e-08	-?--?---?	415492	59.9	12.465	5	0.02894
4	98808873	rs56031708	C	G	0.9368	0.0019	0.0632	G	6.304	0.0494003	0.00783635	2.896e-10	??++?-++?	275048	0	3.623	4	0.4594
4	98810715	rs12640793	C	G	0.0632	0.0019	0.0632	C	-6.3	-0.049369	0.00783635	2.97e-10	??--?+--?	275048	0	3.623	4	0.4594
4	98816302	rs1596416	T	G	0.0719	0.0112	0.0719	T	-5.688	-0.0344267	0.00605251	1.286e-08	-?????--?	409077	81.1	10.572	2	0.005063
4	98816645	rs1838231	A	T	0.9332	0.0001	0.0668	T	5.954	0.0460101	0.0077276	2.622e-09	??????++?	268633	63.6	2.747	1	0.09744
4	98818000	rs1838230	T	C	0.9281	0.0112	0.0719	C	5.683	0.0343964	0.00605251	1.326e-08	+?????++?	409077	81	10.554	2	0.005108
4	98822394	rs12331010	A	G	0.0753	0.01	0.0753	A	-5.599	-0.0331749	0.00592515	2.155e-08	-?????--?	409077	79.2	9.594	2	0.008253
4	98822573	rs1562035	A	T	0.0666	0.0001	0.0666	A	-5.956	-0.0460897	0.00773837	2.589e-09	??????--?	268633	61.3	2.582	1	0.1081
4	98830643	rs145441283	A	G	0.9757	0.0024	0.0243	G	19.51	0.189756	0.00972609	9.008e-85	+++-?+++?	445862	75.4	24.369	6	0.0004466
4	98887542	rs1813867	T	C	0.0313	0.0024	0.0313	T	-8.161	-0.0723812	0.00886916	3.323e-16	-???-?--?	419277	0	2.737	3	0.434
4	98956251	rs1230148	T	G	0.2835	0.0231	0.2835	T	-6.922	-0.0238268	0.00344218	4.445e-12	-?++?---?	415492	0	4.942	5	0.423
4	98972194	rs60478839	A	G	0.013	0.0005	0.013	A	-6.303	-0.107359	0.017033	2.925e-10	??????--?	268633	64.3	2.797	1	0.09441
4	98990355	rs192822960	A	G	0.0029	0.0002	0.0029	A	-5.581	-0.162271	0.0290756	2.387e-08	-?????--?	409077	0	1.934	2	0.3802
4	99015964	rs35525191	T	G	0.0126	0.0005	0.0126	T	-6.005	-0.0841741	0.0140173	1.919e-09	-?????--?	409077	85.5	13.778	2	0.001019
4	99019987	rs146788033	A	G	0.9682	0.0047	0.0318	G	18.685	0.165202	0.00884143	6.569e-78	+?+-?+++?	415492	76.7	21.435	5	0.0006703
4	99032659	rs57645502	A	G	0.0124	0.0005	0.0124	A	-6.315	-0.0892215	0.0141285	2.709e-10	-?????--?	409077	83.2	11.921	2	0.002579
4	99038781	rs17216080	T	C	0.798	0.0612	0.202	C	6.346	0.0236331	0.0037241	2.212e-10	++++?+++?	447305	28.4	8.379	6	0.2116
4	99041849	rs74772928	A	G	0.9872	0.0005	0.0128	G	6.08	0.0845656	0.0139088	1.205e-09	+?????++?	409077	83.4	12.027	2	0.002445
4	99067562	rs17595186	A	G	0.1589	0.0507	0.1589	A	-5.615	-0.0238277	0.00424358	1.963e-08	-?+-?---?	415492	0	3.369	5	0.6433
4	99073254	rs29001570	T	C	0.9868	0.0016	0.0132	C	12.83	0.166303	0.012962	1.117e-37	++++++++?	456932	0	6.958	7	0.4332
4	99097938	rs551676206	A	C	0.9713	0.0032	0.0287	C	21.548	0.193149	0.00896366	5.52e-103	+++-?+++?	446472	83.8	37.068	6	1.708e-06
4	99116515	rs11722615	A	G	0.0301	0.0088	0.0301	A	-10.359	-0.0907526	0.00876075	3.814e-25	---+?---?	446297	52.7	12.679	6	0.04842
4	99131404	rs29001207	C	G	0.0408	0.0024	0.0408	C	-7.7	-0.0692602	0.00899483	1.365e-14	?--++---?	315824	54.6	13.204	6	0.03991
4	99145921	rs188040771	A	G	0.0042	0.0002	0.0042	A	-5.571	-0.129747	0.0232897	2.527e-08	--????--?	440810	73.2	11.175	3	0.01082
4	99146962	rs116203444	T	C	0.9645	0.0054	0.0355	C	20.595	0.166637	0.00809112	3.02e-94	+++-?+++?	446120	86.8	45.51	6	3.705e-08
4	99172538	rs62325497	A	G	0.0345	0.0089	0.0345	A	-9.019	-0.073994	0.00820424	1.904e-19	---+?---?	446018	36.8	9.5	6	0.1473
4	99188707	rs62325499	T	C	0.0086	0.0002	0.0086	T	-10.193	-0.166065	0.016292	2.121e-24	--?-??--?	441877	24.9	5.325	4	0.2555
4	99189847	rs148329623	A	T	0.9948	0.0004	0.0052	T	5.761	0.146138	0.0253668	8.357e-09	?+????++?	300420	59.3	4.908	2	0.08594
4	99198973	rs10014818	A	G	0.1259	0.042	0.1259	A	-8.035	-0.037576	0.00467655	9.384e-16	-?+-?---?	415492	2.4	5.123	5	0.401
4	99201759	rs11733695	A	G	0.0133	0.0016	0.0133	A	-13.124	-0.169697	0.0129303	2.395e-39	---++?--?	455773	57.2	14.008	6	0.02954
4	99234313	rs1154431	A	G	0.9678	0.008	0.0322	G	9.973	0.0845759	0.00848049	2.009e-23	+++-?+++?	446187	32.5	8.895	6	0.1795
4	99242948	rs540508277	T	C	0.9945	0.0001	0.0055	C	8.14	0.212354	0.0260877	3.942e-16	??????++?	268633	0	0.841	1	0.359
4	99318162	rs1229984	T	C	0.0659	0.0096	0.0659	T	-30.452	-0.183528	0.0060268	1.12e-203	---+?---?	447247	94.3	105.66	6	1.649e-20
4	99322775	rs1229982	T	G	0.2285	0.0046	0.2285	T	-8.747	-0.0311461	0.00356078	2.188e-18	--+-?----	447392	68.8	22.419	7	0.00215
4	99323064	rs3811802	A	G	0.6017	0.0008	0.3983	G	-7.776	-0.0306465	0.00394117	7.473e-15	??????--?	268633	0	0.607	1	0.4358
4	99324332	rs1693439	A	G	0.0471	0.0086	0.0471	A	-6.028	-0.0421192	0.00698727	1.661e-09	--+-+---?	456370	0	6.677	7	0.4633
4	99325554	rs1693435	T	G	0.2021	0.0389	0.2021	T	7.023	0.0261611	0.00372506	2.179e-12	++++?++++	446908	5.5	7.41	7	0.3875
4	99325959	rs71612681	A	C	0.1325	0.0471	0.1325	A	5.711	0.0252215	0.0044163	1.124e-08	+++-?-++?	446064	0	4.059	6	0.6687
4	99326194	rs2213041	A	C	0.1965	0.0438	0.1965	A	8.895	0.0334854	0.00376452	5.824e-19	++++?+++?	446922	61.1	15.425	6	0.01719
4	99326452	rs78346552	A	G	0.8707	0.0352	0.1293	G	-8.296	-0.0369453	0.00445338	1.076e-16	----?----	447871	58.9	17.04	7	0.01714
4	99326708	rs1789889	A	G	0.1964	0.0436	0.1964	A	8.835	0.0332659	0.00376524	9.976e-19	++++?+++?	446924	61.5	15.595	6	0.0161
4	99327485	rs145452708	C	G	0.0321	0.0022	0.0321	C	-22.094	-0.226311	0.0102431	3.62e-108	?--+?---?	306762	79.9	24.875	5	0.0001473
4	99327600	rs35348915	C	G	0.832	0.011	0.168	G	-5.656	-0.0273696	0.00483904	1.553e-08	?--+?+--?	305526	0	1.959	5	0.8548
4	99327749	rs71612682	T	C	0.1348	0.0475	0.1348	T	6.106	0.0267645	0.00438331	1.019e-09	+++-?-++?	446261	0	3.004	6	0.8083
4	99327770	rs2226898	A	T	0.834	0.0125	0.166	T	-8.175	-0.0396638	0.00485185	2.964e-16	?---?---?	306840	62.5	13.347	5	0.02034
4	99328569	rs138495951	A	G	0.0292	0.0043	0.0292	A	-22.756	-0.20211	0.00888161	1.26e-114	---+?---?	447202	89.7	58.11	6	1.089e-10
4	99328727	rs1789890	A	G	0.1966	0.0439	0.1966	A	8.903	0.0334934	0.00376203	5.443e-19	++++?+++?	447342	61.6	15.635	6	0.01585
4	99329262	rs1789891	A	C	0.1975	0.0452	0.1975	A	8.896	0.0334092	0.00375553	5.801e-19	++++?+++?	447349	61.7	15.662	6	0.01569
4	99329501	rs1789892	A	G	0.3313	0.0073	0.3313	A	11.824	0.0375644	0.00317696	2.935e-32	++++?++++	447223	61.1	17.999	7	0.01198
4	99329704	rs36070167	T	C	0.1348	0.0476	0.1348	T	6.073	0.0266188	0.00438314	1.254e-09	+++-?-++?	446295	0	3.049	6	0.8027
4	99329910	rs2866152	C	G	0.1684	0.011	0.1684	C	5.644	0.0272712	0.00483189	1.666e-08	?++-?-++?	305851	0	1.798	5	0.8763
4	99331041	rs13117923	T	G	0.3883	0.0855	0.3883	T	-6.988	-0.0222443	0.00318321	2.795e-12	-?-+?---?	415492	14.8	5.871	5	0.319
4	99331151	rs113659074	T	G	0.2868	0.1186	0.2868	T	-9.96	-0.0341651	0.00343023	2.275e-23	-?-+?---?	415492	51.8	10.38	5	0.06516
4	99331229	rs1229863	A	T	0.1662	0.0125	0.1662	A	8.263	0.0400674	0.00484902	1.42e-16	?+++?+++?	306902	62.2	13.234	5	0.02128
4	99331403	rs3114045	T	C	0.3264	0.112	0.3264	T	-12.571	-0.0415922	0.00330859	3.035e-36	-?-+?---?	415492	57.4	11.737	5	0.03858
4	99332406	rs67631357	A	C	0.3906	0.085	0.3906	A	-6.977	-0.0221855	0.00317981	3.011e-12	-?-+?---?	415492	18.9	6.163	5	0.2907
4	99332491	rs1154432	A	G	0.1965	0.0439	0.1965	A	8.907	0.0335147	0.00376274	5.225e-19	++++?+++?	447346	62	15.802	6	0.01486
4	99332551	rs1154433	A	G	0.6685	0.0073	0.3315	G	-11.89	-0.0377683	0.00317648	1.337e-32	----?----	447223	60.7	17.834	7	0.01274
4	99333413	rs1154430	A	G	0.1965	0.0439	0.1965	A	8.989	0.0338233	0.00376274	2.488e-19	++++?+++?	447346	61.5	15.572	6	0.01625
4	99333778	rs3846448	A	G	0.1349	0.0476	0.1349	A	6.075	0.0266187	0.00438168	1.238e-09	+++-?-++?	446313	0	3.038	6	0.8041
4	99334235	rs78188192	A	T	0.1472	0.0102	0.1472	A	5.463	0.0294001	0.00538168	4.672e-08	??+-?-++?	275048	0	1.779	4	0.7762
4	99334796	rs1229979	T	C	0.1998	0.0384	0.1998	T	6.807	0.0254539	0.00373937	9.943e-12	++++?++++	447310	12.4	7.989	7	0.3336
4	99335042	rs1229978	T	C	0.6707	0.0071	0.3293	C	-11.65	-0.0370646	0.00318151	2.288e-31	----?----	447314	61.6	18.253	7	0.01088
4	99335572	rs1789895	C	G	0.7729	0.0084	0.2271	G	-6.645	-0.0285879	0.00430216	3.03e-11	?---?----	307812	0	5.107	6	0.5301
4	99335636	rs1662031	A	G	0.6708	0.0071	0.3292	G	-11.691	-0.0371589	0.00317842	1.413e-31	----?----	448255	62.1	18.482	7	0.009975
4	99335667	rs3098808	A	G	0.9576	0.0069	0.0424	G	6.91	0.0536168	0.0077593	4.853e-12	+?????++?	409077	0	0.146	2	0.9295
4	99335827	rs1789896	A	G	0.6221	0.0136	0.3779	G	-7.791	-0.0249283	0.00319963	6.642e-15	-?--?---?	415492	45.7	9.215	5	0.1008
4	99336275	rs3114046	T	C	0.0483	0.0089	0.0483	T	-5.466	-0.0390314	0.00714076	4.594e-08	-?+-++---	426642	0	4.57	7	0.7123
4	99336750	rs2298753	T	C	0.8708	0.0351	0.1292	C	-8.276	-0.0364766	0.00440752	1.276e-16	--------?	457542	52	14.573	7	0.04189
4	99336850	rs1612735	T	C	0.6708	0.0071	0.3292	C	-11.682	-0.0371303	0.00317842	1.584e-31	----?----	448255	61.4	18.15	7	0.01131
4	99336897	rs1693453	A	C	0.9577	0.0072	0.0423	C	6.862	0.0533044	0.00776806	6.79e-12	+?????++?	409077	0	0.155	2	0.9253
4	99337067	rs1391088	A	C	0.0481	0.0091	0.0481	A	-5.636	-0.0408155	0.00724193	1.736e-08	-?+-?+---	416442	0	1.633	6	0.9501
4	99337179	rs1789898	A	C	0.6708	0.0071	0.3292	C	-11.676	-0.0371112	0.00317842	1.699e-31	----?----	448255	61.4	18.143	7	0.01134
4	99337224	rs1662033	T	G	0.7999	0.0384	0.2001	G	-6.883	-0.0256965	0.00373332	5.854e-12	----?----	448256	10.8	7.847	7	0.3462
4	99337454	rs1693454	T	C	0.7999	0.0384	0.2001	C	-6.883	-0.0256965	0.00373332	5.868e-12	----?----	448256	11	7.861	7	0.345
4	99337491	rs3910713	T	G	0.8718	0.0357	0.1282	G	-8.379	-0.0370147	0.00441755	5.331e-17	---------	458492	53.7	17.295	8	0.02718
4	99337518	rs1442479	T	C	0.6719	0.0067	0.3281	C	-11.702	-0.0372278	0.00318132	1.248e-31	----?----	448203	60.8	17.836	7	0.01273
4	99337524	rs1442480	A	C	0.6719	0.0067	0.3281	C	-11.696	-0.0372087	0.00318132	1.338e-31	----?----	448203	60.6	17.789	7	0.01296
4	99337560	rs1789900	A	T	0.6692	0.0068	0.3308	T	-10.822	-0.0415265	0.00383723	2.697e-27	?---?---?	306791	61.4	12.941	5	0.02394
4	99337890	rs1442481	A	G	0.6709	0.0071	0.3291	G	-11.657	-0.0370537	0.00317866	2.111e-31	----?----	448255	61.4	18.136	7	0.01137
4	99338194	rs1693456	A	G	0.3269	0.0064	0.3269	A	11.641	0.0370664	0.00318413	2.556e-31	++++?++++	448255	63.1	18.992	7	0.008213
4	99338212	rs1789901	T	C	0.8017	0.0372	0.1983	C	-6.864	-0.0257127	0.00374602	6.704e-12	----?----	448256	18.2	8.561	7	0.2857
4	99338684	rs1662060	T	C	0.671	0.0072	0.329	C	-11.674	-0.0371106	0.00317891	1.727e-31	----?----	448255	61.3	18.11	7	0.01148
4	99339014	rs1789902	T	C	0.3291	0.0072	0.3291	T	11.664	0.0370751	0.00317859	1.951e-31	++++?++++	448275	61.1	18.011	7	0.01192
4	99339117	rs1693476	T	C	0.6709	0.0072	0.3291	C	-11.666	-0.0370815	0.00317859	1.911e-31	----?----	448275	61.1	17.985	7	0.01204
4	99339221	rs1662059	A	C	0.6709	0.0072	0.3291	C	-11.673	-0.0371037	0.00317859	1.748e-31	----?----	448275	60.9	17.899	7	0.01243
4	99339388	rs62307295	A	C	0.129	0.0351	0.129	A	8.376	0.0369034	0.00440585	5.495e-17	+++++++++	458492	53.7	17.296	8	0.02717
4	99339522	rs561222871	T	C	0.2683	0.125	0.2683	T	-10.785	-0.0377626	0.0035014	4.069e-27	-?-+?---?	415492	55.2	11.167	5	0.04818
4	99339632	rs698	T	C	0.671	0.0067	0.329	C	-11.596	-0.0368997	0.00318211	4.327e-31	----?---?	447354	65.7	17.496	6	0.007623
4	99339881	rs2298755	C	G	0.6708	0.0074	0.3292	G	-10.975	-0.0420967	0.00383569	5.041e-28	?---?----	307794	54.6	13.212	6	0.03979
4	99339963	rs3114047	A	G	0.0424	0.0071	0.0424	A	-7.428	-0.0555142	0.00747364	1.1e-13	--????--?	440946	0	1.268	3	0.7367
4	99340059	rs3114048	A	G	0.3291	0.0071	0.3291	A	11.652	0.037037	0.0031786	2.23e-31	++++?++++	448274	60.6	17.778	7	0.01301
4	99340095	rs35189763	A	C	0.129	0.0351	0.129	A	8.375	0.0368992	0.00440587	5.522e-17	+++++++++	458489	53.5	17.186	8	0.02823
4	99340420	rs55753621	A	AT	0.3256	0.002	0.3256	A	6.066	0.0714963	0.0117864	1.315e-09	?+??????+	32782	0	0.034	1	0.8539
4	99340795	rs1693471	A	G	0.3291	0.0072	0.3291	A	11.651	0.0370338	0.0031786	2.27e-31	++++?++++	448274	60.8	17.869	7	0.01258
4	99340884	rs1789903	C	G	0.6683	0.0076	0.3317	G	-10.861	-0.0415773	0.00382812	1.776e-27	?---?----	307830	54.8	13.262	6	0.03906
4	99341085	rs141973904	T	C	0.0292	0.0044	0.0292	T	-22.802	-0.20252	0.00888167	4.4e-115	---+?---?	447196	89.9	59.155	6	6.682e-11
4	99341251	rs1789904	A	G	0.1998	0.0384	0.1998	A	6.803	0.0254115	0.00373534	1.028e-11	++++?+++-	448277	11.7	7.924	7	0.3393
4	99341602	rs1662058	T	C	0.6709	0.0071	0.3291	C	-11.636	-0.0369861	0.0031786	2.695e-31	----?----	448274	60.5	17.738	7	0.01321
4	99341905	rs1693477	T	C	0.3294	0.0073	0.3294	T	11.637	0.0369822	0.00317798	2.683e-31	++++?++++	448239	59.1	17.135	7	0.01655
4	99342062	rs1789906	A	T	0.331	0.0075	0.331	A	10.931	0.0418743	0.00383079	8.199e-28	?+++?++++	307730	51.1	12.276	6	0.05608
4	99342090	rs904093	T	C	0.6714	0.0069	0.3286	C	-11.691	-0.0371795	0.00318018	1.41e-31	----?----	448174	59.1	17.108	7	0.01671
4	99342095	rs904094	A	G	0.6713	0.0069	0.3287	G	-11.712	-0.0372434	0.00317994	1.112e-31	----?----	448174	59.1	17.099	7	0.01677
4	99342226	rs904095	A	G	0.6735	0.006	0.3265	G	-11.592	-0.0369208	0.00318503	4.541e-31	----?----	448284	62.5	18.647	7	0.009367
4	99342257	rs1662057	T	C	0.6735	0.0061	0.3265	C	-11.619	-0.0370078	0.00318511	3.3e-31	----?----	448261	62.8	18.84	7	0.008704
4	99342260	rs1789908	A	T	0.6723	0.0071	0.3277	T	-10.796	-0.0414569	0.00384002	3.592e-27	?---?----	307817	58.3	14.399	6	0.02548
4	99342427	rs904096	T	G	0.6708	0.0071	0.3292	G	-11.663	-0.0370696	0.00317839	1.971e-31	----?----	448263	60.9	17.884	7	0.0125
4	99342538	rs2866153	A	T	0.8968	0.0098	0.1032	T	-7.661	-0.0454248	0.00592936	1.843e-14	?---?----	307333	62.6	16.022	6	0.01363
4	99342558	rs1789910	A	G	0.671	0.007	0.329	G	-11.641	-0.0370045	0.00317881	2.537e-31	----?----	448283	60.3	17.615	7	0.01383
4	99342605	rs1693480	C	G	0.3309	0.0074	0.3309	C	10.875	0.0416555	0.00383039	1.511e-27	?+++?++++	307841	53.8	12.975	6	0.04343
4	99342621	rs1789911	T	C	0.6714	0.0069	0.3286	C	-11.659	-0.0370732	0.00317979	2.063e-31	----?----	448285	60.3	17.627	7	0.01377
4	99342677	rs1693481	T	C	0.329	0.0071	0.329	T	11.68	0.0371292	0.00317887	1.615e-31	++++?++++	448267	61	17.947	7	0.01221
4	99342785	rs1789912	T	C	0.3286	0.0069	0.3286	T	11.626	0.0369687	0.00317983	3.039e-31	++++?++++	448274	59.4	17.222	7	0.01602
4	99342808	rs1693482	T	C	0.3285	0.0064	0.3285	T	11.589	0.0368913	0.00318331	4.661e-31	++++?+++?	447365	64.3	16.81	6	0.01001
4	99343463	rs1631460	C	G	0.3318	0.0075	0.3318	C	10.839	0.0414899	0.00382783	2.247e-27	?+++?++++	307830	54.2	13.104	6	0.04141
4	99343789	rs1693483	T	C	0.6709	0.0071	0.3291	C	-11.651	-0.0370334	0.00317856	2.258e-31	----?----	448285	59.8	17.414	7	0.01492
4	99344079	rs1693424	C	G	0.6685	0.0076	0.3315	G	-10.844	-0.0415177	0.00382864	2.127e-27	?---?----	307841	53.5	12.909	6	0.0445
4	99344168	rs1625439	A	C	0.3288	0.007	0.3288	A	11.688	0.0371596	0.0031793	1.475e-31	++++?++++	448285	60.2	17.602	7	0.0139
4	99344191	rs1789913	A	G	0.6712	0.007	0.3288	G	-11.692	-0.0371723	0.0031793	1.404e-31	----?----	448285	60.3	17.616	7	0.01383
4	99344358	rs62307297	A	G	0.329	0.0071	0.329	A	11.639	0.0369981	0.0031788	2.612e-31	++++?++++	448285	60.3	17.624	7	0.01379
4	99344393	rs62307298	C	G	0.6685	0.0076	0.3315	G	-10.858	-0.0415714	0.00382864	1.819e-27	?---?----	307841	53.5	12.897	6	0.0447
4	99344446	rs1789914	T	G	0.3286	0.007	0.3286	T	11.662	0.0370834	0.00317985	1.994e-31	++++?++++	448268	60.1	17.524	7	0.01431
4	99344465	rs1662056	A	C	0.8201	0.0297	0.1799	C	-6.841	-0.026639	0.00389402	7.872e-12	----?+---	446997	0	6.722	7	0.4584
4	99344468	rs1662055	C	G	0.2009	0.007	0.2009	C	6.745	0.0304046	0.00450772	1.534e-11	?+++?-+++	306553	0	3.079	6	0.7989
4	99344955	rs1693425	T	C	0.329	0.0071	0.329	T	11.648	0.0370267	0.0031788	2.343e-31	++++?++++	448285	60.1	17.557	7	0.01414
4	99345173	rs1693426	A	G	0.6711	0.0071	0.3289	G	-11.685	-0.0371472	0.00317905	1.519e-31	----?----	448285	60	17.491	7	0.01449
4	99345214	rs1789915	A	G	0.8001	0.0384	0.1999	G	-6.808	-0.025425	0.00373458	9.878e-12	----?---+	448291	8.8	7.674	7	0.3622
4	99345426	rs1662053	A	C	0.671	0.0071	0.329	C	-11.674	-0.0371115	0.00317899	1.725e-31	----?----	448232	61.7	18.297	7	0.0107
4	99345478	rs1662052	A	G	0.6711	0.0071	0.3289	G	-11.693	-0.0371748	0.00317924	1.388e-31	----?----	448232	61.7	18.265	7	0.01083
4	99345539	rs1789916	A	G	0.3289	0.0071	0.3289	A	11.709	0.0372257	0.00317924	1.152e-31	++++?++++	448232	61.3	18.106	7	0.0115
4	99345670	rs1693427	T	C	0.671	0.0071	0.329	C	-11.669	-0.0370957	0.00317899	1.831e-31	----?----	448232	61.7	18.297	7	0.0107
4	99345774	rs1693428	A	T	0.6684	0.0076	0.3316	T	-10.89	-0.0416945	0.0038287	1.292e-27	?---?----	307785	55.6	13.506	6	0.03567
4	99345866	rs62307318	A	G	0.1289	0.0352	0.1289	A	8.464	0.0373051	0.0044075	2.585e-17	+++++++++	458453	55.5	17.989	8	0.02131
4	99345999	rs6532815	A	G	0.7114	0.1181	0.2886	G	10.816	0.0357352	0.00330392	2.887e-27	+++-?+++?	446202	45.9	11.096	6	0.08546
4	99346007	rs1789917	A	G	0.3287	0.0071	0.3287	A	11.691	0.0371742	0.00317973	1.423e-31	++++?++++	448232	61.5	18.18	7	0.01118
4	99346082	rs1662051	A	C	0.3288	0.0071	0.3288	A	11.483	0.0361016	0.00314391	1.607e-30	++++-++++	458432	64.3	22.438	8	0.004166
4	99346511	rs1693430	T	C	0.3289	0.0072	0.3289	T	11.679	0.0371303	0.00317924	1.629e-31	++++?++++	448232	61.7	18.259	7	0.01085
4	99346515	rs283412	A	G	0.0264	0.0004	0.0264	A	-10.078	-0.0937282	0.00930028	6.939e-24	--??+?--?	449804	60.4	10.089	4	0.03895
4	99346562	rs1789919	A	G	0.6721	0.0067	0.3279	G	-11.69	-0.0371942	0.00318171	1.433e-31	----?----	448232	62.2	18.542	7	0.009751
4	99346892	rs1693431	T	G	0.6711	0.0071	0.3289	G	-11.678	-0.0371271	0.00317924	1.65e-31	----?----	448232	61.5	18.193	7	0.01113
4	99346975	rs33988198	A	C	0.8712	0.0352	0.1288	C	-8.46	-0.0372998	0.00440896	2.673e-17	---------	458453	55.5	17.993	8	0.02128
4	99347033	rs283413	A	C	0.0135	0.0021	0.0135	A	-12.751	-0.163591	0.0128297	3.082e-37	---++?--?	456182	67.7	18.601	6	0.004894
4	99347445	rs34178057	A	C	0.8712	0.0352	0.1288	C	-8.465	-0.0373218	0.00440896	2.556e-17	---------	458453	55.5	17.987	8	0.02132
4	99347699	rs1789920	A	C	0.8002	0.0382	0.1998	C	-6.834	-0.0255281	0.00373546	8.255e-12	----?----	448247	8.6	7.66	7	0.3636
4	99347888	rs17526590	A	G	0.1288	0.0352	0.1288	A	8.471	0.0373483	0.00440896	2.441e-17	+++++++++	458453	55.5	17.972	8	0.02144
4	99348045	rs1789921	A	G	0.1994	0.0379	0.1994	A	6.826	0.0255176	0.00373829	8.74e-12	++++?++++	448243	6	7.449	7	0.3837
4	99349068	rs13147169	T	G	0.7717	0.0025	0.2283	G	-6.381	-0.0276932	0.00433995	1.758e-10	?-????---	301353	38.2	4.852	3	0.183
4	99349099	rs13147189	T	C	0.7695	0.0026	0.2305	C	-6.372	-0.0275606	0.00432526	1.869e-10	?-????---	301367	41.5	5.131	3	0.1624
4	99349295	rs13125415	A	G	0.664	0.0109	0.336	G	-11.331	-0.0359267	0.00317066	9.257e-30	----?---?	445856	61.8	15.717	6	0.01536
4	99349450	rs283415	T	C	0.6386	0.007	0.3614	C	-7.637	-0.0246623	0.00322931	2.216e-14	-?--?---?	415492	26.1	6.763	5	0.2389
4	99349455	rs3133158	C	G	0.7728	0.0084	0.2272	G	-6.597	-0.0283763	0.00430139	4.185e-11	?---?----	307827	0	5.077	6	0.5339
4	99349851	rs35920708	T	TA	0.3299	0.0019	0.3299	T	6.201	0.0728922	0.0117549	5.614e-10	?+??????+	32737	0	0.031	1	0.8613
4	99350149	rs1629270	A	G	0.6714	0.007	0.3286	G	-11.705	-0.0372218	0.00317999	1.197e-31	----?----	448228	61.1	18.01	7	0.01192
4	99350453	rs1789923	T	C	0.2	0.0384	0.2	T	6.832	0.0255104	0.00373396	8.359e-12	++++?++++	448271	8.2	7.624	7	0.3669
4	99350692	rs1662049	T	C	0.3303	0.0072	0.3303	T	11.188	0.0355311	0.00317582	4.687e-29	++++?++++	448227	59.9	17.45	7	0.01471
4	99350875	rs1662048	T	C	0.6704	0.0069	0.3296	C	-11.231	-0.0356901	0.00317782	2.871e-29	----?----	448146	60.4	17.666	7	0.01357
4	99350898	rs1662047	C	G	0.2273	0.0082	0.2273	C	6.097	0.0262216	0.00430074	1.08e-09	?+++?+++-	307825	0	5.299	6	0.5061
4	99350909	rs1662045	A	G	0.2007	0.0381	0.2007	A	6.289	0.0234522	0.00372908	3.191e-10	++++?+++-	448269	8.4	7.639	7	0.3655
4	99351140	rs142139141	CA	C	0.1176	0.058	0.1176	CA	6.341	0.0994528	0.0156841	2.286e-10	?+++?+??+	39175	0	1.209	4	0.8765
4	99351793	rs17586023	A	G	0.8712	0.0352	0.1288	G	-8.469	-0.0373379	0.00440877	2.466e-17	---------	458491	55.6	18.03	8	0.021
4	99352013	rs34761493	A	G	0.2903	0.1172	0.2903	A	-10.728	-0.0353663	0.00329664	7.508e-27	---+?---?	446618	47.1	11.332	6	0.07865
4	99353129	rs1789924	T	C	0.3303	0.0072	0.3303	T	11.17	0.0354704	0.00317551	5.726e-29	++++?++++	448317	59.2	17.176	7	0.0163
4	99353307	rs34774688	A	T	0.8957	0.0098	0.1043	T	-7.702	-0.0454164	0.0058967	1.34e-14	?---?----	307847	62.7	16.107	6	0.01319
4	99353414	rs17586163	T	C	0.8711	0.0353	0.1289	C	-8.368	-0.0372991	0.00445735	5.857e-17	----?----	448255	61	17.945	7	0.01222
4	99353592	rs11499823	A	G	0.8712	0.0352	0.1288	G	-8.437	-0.0371968	0.00440877	3.259e-17	---------	458491	55.8	18.114	8	0.02039
4	99353739	rs1629838	A	G	0.3304	0.0068	0.3304	A	11.132	0.0353857	0.00317874	8.796e-29	++++?+++?	447337	64.8	17.06	6	0.009066
4	99354148	rs2584453	C	G	0.6673	0.007	0.3327	G	-10.311	-0.0395021	0.00383107	6.312e-25	?---?---?	306893	61	12.83	5	0.02502
4	99354588	rs1789925	T	C	0.6697	0.0068	0.3303	C	-11.129	-0.0353789	0.00317898	9.074e-29	----?---?	447337	65	17.126	6	0.008832
4	99354658	rs1693468	C	G	0.7923	0.0076	0.2077	G	-6.085	-0.0271362	0.00445953	1.166e-09	?---?+--?	305560	0	3.083	5	0.6872
4	99354745	rs1693469	A	G	0.3302	0.0068	0.3302	A	11.14	0.0354166	0.00317923	8.029e-29	++++?+++?	447337	65	17.133	6	0.008808
4	99354882	rs166893	C	G	0.9752	0.0002	0.0248	G	8.121	0.0954563	0.0117543	4.628e-16	?+????++?	299271	31.4	2.915	2	0.2328
4	99355412	rs283407	T	C	0.0252	0.0006	0.0252	T	-8.774	-0.0834577	0.00951194	1.718e-18	--??+?--?	449931	58.4	9.618	4	0.04737
4	99355614	rs78744403	A	G	0.1288	0.0353	0.1288	A	8.317	0.0366759	0.00440975	9.006e-17	+++++++++	458287	48.4	15.495	8	0.05021
4	99355702	rs172222	A	G	0.0251	0.0006	0.0251	A	-8.795	-0.0838306	0.00953162	1.433e-18	--??+?--?	449814	52.9	8.497	4	0.07498
4	99355779	rs11499826	A	G	0.3304	0.0069	0.3304	A	11.019	0.0350367	0.00317966	3.081e-28	++++?+++?	447078	60.6	15.217	6	0.01864
4	99355853	rs4093924	T	C	0.6663	0.002	0.3337	C	-9.974	-0.0386035	0.00387041	1.981e-23	?-????--?	300234	80.1	10.047	2	0.006583
4	99355957	rs283408	T	G	0.6387	0.0071	0.3613	G	-7.632	-0.0246476	0.00322951	2.309e-14	-?--?---?	415492	24.7	6.644	5	0.2485
4	99356280	rs2453980	T	C	0.3311	0.0069	0.3311	T	11.026	0.0350451	0.00317841	2.851e-28	++++?+++?	446951	61	15.378	6	0.01751
4	99356401	rs11499828	T	C	0.8713	0.0352	0.1287	C	-8.306	-0.0366395	0.00441121	9.895e-17	---------	458287	48.5	15.525	8	0.04971
4	99357540	rs4699741	T	C	0.7154	0.1193	0.2846	C	10.312	0.0354544	0.00343817	6.244e-25	+?+-?+++?	415492	56.4	11.478	5	0.04268
4	99357662	rs1662037	A	G	0.2015	0.0387	0.2015	A	6.261	0.0233375	0.00372745	3.828e-10	++++?+++?	447329	16.9	7.221	6	0.3009
4	99358090	rs980972	A	C	0.3305	0.0069	0.3305	A	11.035	0.0350843	0.00317936	2.577e-28	++++?+++?	447093	60.6	15.224	6	0.01859
4	99358175	rs1614377	A	G	0.2004	0.0372	0.2004	A	6.182	0.0230905	0.00373512	6.313e-10	++++?+++?	447323	8.2	6.532	6	0.3663
4	99358301	rs62307321	T	C	0.8696	0.0343	0.1304	C	-8.277	-0.0363459	0.0043912	1.266e-16	--------?	457338	47.5	13.328	7	0.06451
4	99358332	rs1693470	A	G	0.3304	0.0068	0.3304	A	11.042	0.0351093	0.00317962	2.408e-28	++++?+++?	447090	60.7	15.265	6	0.01829
4	99358527	rs1662039	A	G	0.3301	0.0068	0.3301	A	11.025	0.0350632	0.00318034	2.911e-28	++++?+++?	447093	60.5	15.2	6	0.01876
4	99358667	rs2851300	T	C	0.3302	0.0068	0.3302	T	11.028	0.0350701	0.00318009	2.796e-28	++++?+++?	447093	60.9	15.34	6	0.01777
4	99358712	rs2584455	A	T	0.7735	0.008	0.2265	T	-5.818	-0.0250967	0.00431363	5.962e-09	?---?---?	306751	0	4.559	5	0.472
4	99358732	rs78234152	A	G	0.1294	0.035	0.1294	A	8.392	0.0369334	0.00440103	4.785e-17	+++++++++	458288	48.8	15.623	8	0.0481
4	99358884	rs1234584	C	G	0.333	0.0069	0.333	C	10.234	0.0392139	0.00383172	1.393e-24	?+++?+++?	306649	56.4	11.479	5	0.04267
4	99358950	rs1662021	T	C	0.6724	0.0057	0.3276	C	-10.961	-0.0349273	0.00318651	5.914e-28	----?---?	447093	58.6	14.481	6	0.0247
4	99358953	rs1662020	T	C	0.6723	0.0057	0.3277	C	-10.954	-0.0349023	0.00318626	6.349e-28	----?---?	447093	58.5	14.466	6	0.02484
4	99359085	rs1229862	T	G	0.2	0.0378	0.2	T	6.19	0.0231375	0.00373789	6.031e-10	++++?+++?	447330	8.2	6.539	6	0.3656
4	99359643	rs62307322	A	G	0.1304	0.0345	0.1304	A	8.366	0.0366986	0.00438664	5.948e-17	+++++++++	458288	49.2	15.737	8	0.0463
4	99359910	rs113909752	T	C	0.2886	0.1179	0.2886	T	-10.815	-0.0356977	0.00330076	2.93e-27	---+?---?	447057	46.7	11.257	6	0.08074
4	99359977	rs1238015	T	C	0.671	0.0064	0.329	C	-11.02	-0.0350779	0.00318312	3.053e-28	----?---?	447071	59.6	14.834	6	0.02159
4	99359988	rs115179961	T	C	0.2852	0.1189	0.2852	T	-10.346	-0.0355487	0.00343599	4.345e-25	-?-+?---?	415492	58.5	12.039	5	0.03426
4	99360002	rs1235415	A	G	0.329	0.0063	0.329	A	11.079	0.0352649	0.00318304	1.593e-28	++++?+++?	447093	60.1	15.029	6	0.02003
4	99360006	rs283405	A	G	0.0251	0.0006	0.0251	A	-8.954	-0.0863305	0.00964156	3.414e-19	--????--?	439614	36.4	4.719	3	0.1935
4	99360054	rs3098807	A	G	0.025	0.0005	0.025	A	-8.775	-0.0838028	0.00955017	1.704e-18	--??+?--?	449814	48	7.693	4	0.1035
4	99360070	rs1229860	T	C	0.2	0.0378	0.2	T	6.19	0.0231375	0.00373789	6.022e-10	++++?+++?	447330	9.8	6.654	6	0.354
4	99360165	rs1229859	A	G	0.2001	0.0379	0.2001	A	6.183	0.023107	0.00373718	6.274e-10	++++?+++?	447330	9.1	6.602	6	0.3593
4	99360237	rs111405931	A	C	0.2982	0.1155	0.2982	A	-10.436	-0.0341343	0.00327082	1.693e-25	---+?---?	446649	51.6	12.401	6	0.05359
4	99360477	rs1229858	A	G	0.6696	0.0069	0.3304	G	-9.91	-0.0326862	0.00329831	3.783e-23	-?--?---?	415492	37.3	7.969	5	0.1579
4	99360551	rs1229857	T	C	0.3303	0.0069	0.3303	T	9.921	0.032725	0.00329856	3.384e-23	+?++?+++?	415492	37.8	8.036	5	0.1543
4	99360748	rs1229856	C	G	0.3332	0.007	0.3332	C	8.922	0.0360917	0.00404525	4.579e-19	??++?+++?	275048	31.1	5.807	4	0.214
4	99360946	rs4699743	A	G	0.2983	0.1156	0.2983	A	-9.761	-0.0330987	0.00339091	1.649e-22	-?-+?---?	415492	53.5	10.753	5	0.05651
4	99361104	rs62307323	T	C	0.1303	0.0343	0.1303	T	8.117	0.0360727	0.00444409	4.763e-16	++++?++++	446807	47.4	13.313	7	0.06485
4	99361105	rs147851155	A	G	0.2847	0.1193	0.2847	A	-11.077	-0.0367403	0.00331681	1.621e-28	---+?---?	446357	55.4	13.451	6	0.03641
4	99361138	rs1229855	A	G	0.6701	0.0067	0.3299	G	-9.881	-0.0326031	0.00329957	5.008e-23	-?--?---?	415492	34.2	7.594	5	0.1801
4	99361393	rs1229854	T	C	0.3303	0.0069	0.3303	T	9.928	0.0327481	0.00329856	3.149e-23	+?++?+++?	415492	37.6	8.011	5	0.1556
4	99361434	rs62307324	C	G	0.8937	0.0098	0.1063	G	-7.568	-0.0436404	0.00576644	3.796e-14	?--------	316563	40.9	11.848	7	0.1057
4	99362010	rs1229853	A	G	0.1999	0.0378	0.1999	A	6.182	0.0231119	0.00373857	6.331e-10	++++?+++?	447333	8.9	6.589	6	0.3605
4	99362668	rs1229851	T	C	0.3304	0.0069	0.3304	T	9.914	0.0326994	0.00329831	3.614e-23	+?++?+++?	415492	37.2	7.962	5	0.1584
4	99363042	rs7661978	T	C	0.3971	0.0876	0.3971	T	-6.783	-0.0215064	0.00317063	1.18e-11	-?-+?+--?	415492	26.8	6.833	5	0.2333
4	99363528	rs1229849	A	T	0.7734	0.008	0.2266	T	-5.949	-0.0256535	0.00431225	2.701e-09	?---?---?	306852	0	4.503	5	0.4794
4	99363641	rs56109716	A	G	0.8698	0.0344	0.1302	G	-8.231	-0.0361806	0.00439565	1.85e-16	---------	457007	40.7	13.485	8	0.09622
4	99363855	rs1154434	A	G	0.2001	0.0379	0.2001	A	6.181	0.023075	0.00373321	6.35e-10	++++?++++	448283	0	6.656	7	0.4656
4	99363991	rs1154435	A	G	0.3304	0.0073	0.3304	A	9.965	0.0328301	0.00329454	2.171e-23	+?++?++++	416442	31.9	8.817	6	0.1841
4	99364058	rs283423	T	C	0.0255	0.0011	0.0255	T	-7.74	-0.075828	0.0097969	9.924e-15	-???+?--?	419277	36.4	4.716	3	0.1938
4	99364194	rs1154436	A	G	0.2001	0.0379	0.2001	A	6.189	0.0231292	0.00373714	6.06e-10	++++?+++?	447341	11.8	6.804	6	0.3394
4	99364615	rs56009681	A	T	0.8937	0.0098	0.1063	T	-7.55	-0.0435367	0.00576644	4.336e-14	?--------	316562	35.4	10.83	7	0.1462
4	99364720	rs1154437	C	G	0.2252	0.0079	0.2252	C	6.047	0.0261319	0.00432146	1.473e-09	?+++?+++?	306889	0	4.89	5	0.4294
4	99364730	rs1154438	A	G	0.3295	0.0064	0.3295	A	10.031	0.0331082	0.00330059	1.112e-23	+?++?+++?	415492	40.2	8.368	5	0.1371
4	99364928	rs2165670	A	G	0.1302	0.0345	0.1302	A	8.12	0.0360978	0.00444554	4.679e-16	++++?++++	446807	40.6	11.785	7	0.1079
4	99365031	rs192550	T	G	0.9699	0.0011	0.0301	G	6.085	0.0550001	0.00903863	1.169e-09	+???-?++?	419277	0	2.609	3	0.4559
4	99365076	rs1154439	T	C	0.3304	0.0069	0.3304	T	9.923	0.0327291	0.00329831	3.299e-23	+?++?+++?	415492	37.4	7.985	5	0.1571
4	99365290	rs1154440	A	G	0.3304	0.0069	0.3304	A	9.927	0.0327423	0.00329831	3.173e-23	+?++?+++?	415492	37.8	8.035	5	0.1543
4	99365382	rs7692041	T	C	0.298	0.1156	0.298	T	-9.731	-0.0330065	0.00339189	2.235e-22	-?-+?---?	415492	53.7	10.794	5	0.05562
4	99365479	rs1154441	T	G	0.2001	0.038	0.2001	T	6.165	0.0230397	0.00373717	7.049e-10	++++?+++?	447333	10.9	6.734	6	0.3462
4	99365537	rs62305761	A	G	0.1301	0.0345	0.1301	A	8.224	0.0361617	0.00439709	1.969e-16	+++++++++	457007	30.5	11.508	8	0.1746
4	99366021	rs1229973	T	C	0.3307	0.0071	0.3307	T	9.975	0.032893	0.00329755	1.957e-23	+?++?+++?	415492	39.2	8.227	5	0.1441
4	99366090	rs62305762	T	C	0.8698	0.0345	0.1302	C	-8.189	-0.0360335	0.00440023	2.63e-16	--------?	456057	36.3	10.984	7	0.1393
4	99366655	rs1583974	C	G	0.6684	0.0069	0.3316	G	-8.9	-0.0360463	0.00405014	5.601e-19	??--?---?	275048	33.2	5.991	4	0.1998
4	99366659	rs1693448	A	T	0.2254	0.0079	0.2254	A	5.875	0.0253806	0.0043201	4.219e-09	?+++?+++?	306889	0	4.786	5	0.4426
4	99366692	rs1154442	T	C	0.3296	0.0065	0.3296	T	9.909	0.032703	0.00330034	3.8e-23	+?++?+++?	415492	39.2	8.23	5	0.144
4	99366726	rs1583973	T	C	0.1302	0.0345	0.1302	T	8.09	0.0360027	0.00445028	5.957e-16	++++?+++?	445857	45.3	10.969	6	0.08934
4	99366870	rs1154443	T	C	0.7998	0.038	0.2002	C	-6.175	-0.0230727	0.00373647	6.627e-10	----?---?	447333	11.5	6.78	6	0.3417
4	99366932	rs1154444	A	T	0.3334	0.007	0.3334	A	8.949	0.0361955	0.00404464	3.581e-19	??++?+++?	275048	31.3	5.821	4	0.2129
4	99367159	rs78336107	C	G	0.8938	0.0097	0.1062	G	-7.394	-0.0434263	0.00587319	1.424e-13	?---?---?	305413	48.3	9.672	5	0.08509
4	99367364	rs1154445	T	G	0.6696	0.0069	0.3304	G	-9.955	-0.0328346	0.00329831	2.4e-23	-?--?---?	415492	37.9	8.051	5	0.1535
4	99367790	rs1154446	A	C	0.2003	0.038	0.2003	A	6.165	0.0230316	0.00373586	7.065e-10	++++?+++?	447312	8.8	6.581	6	0.3613
4	99367877	rs1154447	T	G	0.3304	0.0069	0.3304	T	9.958	0.0328445	0.00329831	2.327e-23	+?++?+++?	415492	38.6	8.147	5	0.1483
4	99368248	rs62305763	T	C	0.1306	0.0341	0.1306	T	8.237	0.0361975	0.0043945	1.77e-16	++++++++?	456057	36.6	11.038	7	0.137
4	99368735	rs62305764	T	G	0.8698	0.0346	0.1302	G	-8.255	-0.0363239	0.00440023	1.516e-16	--------?	456057	39.5	11.574	7	0.1155
4	99368827	rs1837934	A	C	0.2845	0.1192	0.2845	A	-11.097	-0.0368145	0.00331751	1.298e-28	---+?---?	446357	55.5	13.497	6	0.03579
4	99368859	rs1302810	A	G	0.7998	0.0381	0.2002	G	-6.159	-0.0230129	0.00373647	7.333e-10	----?---?	447333	10.7	6.721	6	0.3474
4	99369122	rs72681920	A	C	0.2845	0.1192	0.2845	A	-11.086	-0.036778	0.00331751	1.474e-28	---+?---?	446357	55.2	13.382	6	0.03735
4	99369139	rs1302809	A	G	0.2214	0.0146	0.2214	A	7.359	0.0265133	0.00360284	1.853e-13	++++?-++?	446909	0	5.107	6	0.5302
4	99369171	rs56390365	A	T	0.894	0.0097	0.106	T	-7.567	-0.0437547	0.0057823	3.813e-14	?-------?	315613	39.8	9.974	6	0.1257
4	99369463	rs55695526	C	G	0.8939	0.0097	0.1061	G	-7.565	-0.043725	0.0057799	3.891e-14	?-------?	315613	39.8	9.965	6	0.1261
4	99369658	rs62305780	C	G	0.894	0.0097	0.106	G	-7.573	-0.0437894	0.0057823	3.657e-14	?-------?	315613	39.7	9.947	6	0.1269
4	99369963	rs1302808	A	C	0.2123	0.0382	0.2123	A	7.995	0.0303306	0.0037937	1.3e-15	+?++?+++?	415492	49.5	9.903	5	0.07804
4	99370058	rs283419	A	G	0.0249	0.0006	0.0249	A	-7.887	-0.0781695	0.00991118	3.094e-15	-???+?--?	419277	29.7	4.265	3	0.2343
4	99371952	rs62305782	T	C	0.1021	0.0077	0.1021	T	7.823	0.0396003	0.00506204	5.143e-15	+?++++++?	425692	0	2.976	6	0.8119
4	99372043	rs62305783	T	C	0.0813	0.0025	0.0813	T	6.718	0.0376756	0.00560816	1.847e-11	+?++++++?	425692	0	4.166	6	0.6542
4	99372151	rs35111578	A	T	0.1135	0.0026	0.1135	A	6.917	0.040829	0.00590271	4.603e-12	??++++++?	285248	0	1.19	5	0.9458
4	99372160	rs36076325	A	G	0.1065	0.01	0.1065	A	7.605	0.0377859	0.00496856	2.846e-14	+?++++++?	425692	0	2.66	6	0.8501
4	99372224	rs34192395	T	G	0.1428	0.0156	0.1428	T	6.454	0.0282733	0.00438074	1.089e-10	+?++-+++?	425692	32.2	8.855	6	0.1819
4	99372339	rs34076947	A	G	0.1418	0.0163	0.1418	A	6.293	0.0276489	0.00439359	3.106e-10	+?+--+++?	425692	38.6	9.769	6	0.1347
4	99372379	rs36041917	A	G	0.8569	0.0162	0.1431	G	-6.46	-0.0282748	0.00437691	1.049e-10	-?-++---?	425692	36.5	9.455	6	0.1495
4	99372385	rs35002104	T	C	0.143	0.0157	0.143	T	6.453	0.0282524	0.00437818	1.093e-10	+?+--+++?	425692	36.4	9.431	6	0.1507
4	99372443	rs34144181	T	C	0.142	0.0162	0.142	T	6.426	0.0285609	0.00444458	1.31e-10	+?+-?+++?	415492	31.8	7.335	5	0.1969
4	99372522	rs34576135	T	C	0.8563	0.0156	0.1437	C	-6.513	-0.0284572	0.00436929	7.346e-11	-?--+---?	425692	38.2	9.706	6	0.1376
4	99372583	rs35302924	T	C	0.1435	0.0157	0.1435	T	6.49	0.0283731	0.00437182	8.572e-11	+?++-+++?	425692	40.4	10.072	6	0.1216
4	99372648	rs34750774	T	G	0.8564	0.0157	0.1436	G	-6.522	-0.0285048	0.00437056	6.916e-11	-?--+---?	425692	40.6	10.095	6	0.1207
4	99373890	rs13121469	T	C	0.1422	0.0164	0.1422	T	6.246	0.0274102	0.00438843	4.215e-10	+?+--+++?	425692	38.6	9.766	6	0.1349
4	99374083	rs56279505	A	T	0.1079	0.0062	0.1079	A	5.729	0.034574	0.00603492	1.012e-08	??++-+++?	285248	7.2	5.386	5	0.3707
4	99374706	rs6827898	A	G	0.142	0.0161	0.142	A	6.391	0.0284053	0.00444458	1.651e-10	+?+-?+++?	415492	32.3	7.391	5	0.1932
4	99375245	rs34980886	A	T	0.1306	0.0048	0.1306	A	6.439	0.0357788	0.00555658	1.2e-10	??+--+++?	285248	0	4.559	5	0.472
4	99377236	rs13110291	A	G	0.8581	0.0166	0.1419	G	-6.31	-0.0277154	0.0043923	2.783e-10	-?-++---?	425692	38.6	9.772	6	0.1346
4	99377241	rs56899508	T	G	0.1419	0.0166	0.1419	T	6.475	0.0287871	0.00444589	9.51e-11	+?+-?+++?	415492	32.1	7.361	5	0.1951
4	99379308	rs12505678	T	C	0.7759	0.0663	0.2241	C	7.784	0.0279169	0.00358644	7.032e-15	++-+?+++?	447120	67.1	18.26	6	0.005615
4	99379393	rs12501721	A	C	0.2234	0.0665	0.2234	A	-7.896	-0.0283502	0.00359045	2.876e-15	--+-?---?	447117	66.8	18.055	6	0.006095
4	99379539	rs1579752	T	G	0.142	0.0161	0.142	T	6.256	0.0274702	0.00439101	3.942e-10	+?+--+++?	425692	38.5	9.761	6	0.1351
4	99379969	rs1826907	A	C	0.858	0.0161	0.142	C	-6.265	-0.0275097	0.00439101	3.724e-10	-?-++---?	425692	37.6	9.617	6	0.1417
4	99380493	rs72681931	T	C	0.776	0.0664	0.224	C	7.795	0.0279608	0.00358701	6.417e-15	++-+?+++?	447120	67.2	18.285	6	0.005558
4	99380543	rs35864506	T	G	0.858	0.0161	0.142	G	-6.241	-0.0274043	0.00439101	4.354e-10	-?-++---?	425692	37.9	9.656	6	0.1399
4	99381861	rs2584456	A	G	0.7717	0.0721	0.2283	G	7.725	0.027522	0.00356272	1.122e-14	++-+?+++?	447180	68.4	18.971	6	0.004213
4	99382344	rs2851292	T	G	0.7719	0.072	0.2281	G	7.591	0.0280656	0.00369722	3.176e-14	+?-+?+++?	415492	72.9	18.463	5	0.002418
4	99382385	rs2646008	T	C	0.7719	0.0719	0.2281	C	7.594	0.0280767	0.00369722	3.111e-14	+?-+?+++?	415492	73.1	18.557	5	0.002323
4	99383009	rs2584457	A	T	0.8234	0.0139	0.1766	T	8.412	0.0420624	0.00500029	4.029e-17	??-+?+++?	275048	11.2	4.505	4	0.3419
4	99383388	rs1372680	A	C	0.1237	0.0208	0.1237	A	5.699	0.0268538	0.00471202	1.206e-08	+?++?+++?	415492	40.9	8.456	5	0.1328
4	99384236	rs10516440	A	G	0.8565	0.0167	0.1435	G	-6.156	-0.0269129	0.00437182	7.441e-10	-?--+---?	425692	28.8	8.427	6	0.2084
4	99384772	rs2584458	A	G	0.2251	0.0691	0.2251	A	-7.668	-0.0284833	0.00371457	1.747e-14	-?+-?---?	415492	73.7	19.021	5	0.001905
4	99384863	rs56912059	A	T	0.8694	0.0048	0.1306	T	-6.347	-0.0352676	0.00555658	2.197e-10	??-++---?	285248	0	4.377	5	0.4966
4	99386221	rs2851293	T	C	0.7764	0.0736	0.2236	C	7.674	0.0285734	0.0037234	1.668e-14	+?-+?+++?	415492	72.8	18.402	5	0.002483
4	99386578	rs2646013	T	C	0.7719	0.0718	0.2281	C	7.591	0.0280656	0.00369722	3.182e-14	+?-+?+++?	415492	72.8	18.414	5	0.00247
4	99386631	rs2646012	C	G	0.8235	0.0134	0.1765	G	8.39	0.0419617	0.0050014	4.854e-17	??-+?+++?	275048	17.7	4.858	4	0.3021
4	99390100	rs6812790	A	C	0.1433	0.0166	0.1433	A	6.094	0.0266574	0.00437436	1.098e-09	+?+--+++?	425692	31.7	8.783	6	0.1861
4	99391552	rs34361428	C	G	0.13	0.0048	0.13	C	6.534	0.0370462	0.00566976	6.391e-11	??+-?+++?	275048	0	0.9	4	0.9246
4	99391600	rs13138907	A	C	0.1419	0.0162	0.1419	A	6.278	0.0279113	0.00444589	3.428e-10	+?+-?+++?	415492	23.7	6.551	5	0.2562
4	99391862	rs2851294	T	C	0.2269	0.0724	0.2269	T	-7.708	-0.0285513	0.00370411	1.282e-14	-?+-?---?	415492	72.5	18.169	5	0.002742
4	99392839	rs2851017	T	C	0.7731	0.0725	0.2269	C	7.675	0.028429	0.00370411	1.651e-14	+?-+?+++?	415492	72.6	18.258	5	0.00264
4	99394171	rs6857127	A	T	0.1765	0.0138	0.1765	A	-8.334	-0.0416817	0.0050014	7.793e-17	??+-?---?	275048	13.8	4.638	4	0.3265
4	99394684	rs6835524	T	C	0.2284	0.072	0.2284	T	-7.365	-0.0272174	0.00369551	1.767e-13	-?++?---?	415492	72.9	18.484	5	0.002398
4	99394824	rs12508928	A	T	0.8682	0.005	0.1318	T	-6.502	-0.0366501	0.00563674	7.944e-11	??-+?---?	275048	0	1.047	4	0.9025
4	99395495	rs2584459	A	G	0.7726	0.072	0.2274	G	7.602	0.0281368	0.00370123	2.926e-14	+?-+?+++?	415492	73	18.496	5	0.002385
4	99395885	rs12510050	A	T	0.8682	0.005	0.1318	T	-6.49	-0.0365825	0.00563674	8.59e-11	??-+?---?	275048	0	0.961	4	0.9157
4	99396912	rs7667079	T	C	0.1419	0.0166	0.1419	T	6.163	0.0270698	0.0043923	7.146e-10	+?+--+++?	425692	36.2	9.401	6	0.1523
4	99396942	rs7667212	T	C	0.1419	0.0166	0.1419	T	6.16	0.0270566	0.0043923	7.27e-10	+?+--+++?	425692	36	9.372	6	0.1537
4	99397176	rs6532816	T	C	0.1416	0.0168	0.1416	T	6.133	0.0269618	0.00439618	8.624e-10	+?+--+++?	425692	35.3	9.268	6	0.1591
4	99398113	rs2197147	C	G	0.1755	0.0139	0.1755	C	-8.483	-0.0425218	0.00501259	2.192e-17	??+-?---?	275048	7	4.302	4	0.3667
4	99398605	rs1583977	A	T	0.1304	0.0048	0.1304	A	6.328	0.0351849	0.0055602	2.477e-10	??+--+++?	285248	0	4.504	5	0.4793
4	99398649	rs2654834	A	G	0.7736	0.0707	0.2264	G	7.654	0.0283734	0.003707	1.942e-14	+?-+?+++?	415492	73.3	18.698	5	0.002188
4	99399386	rs2851016	C	G	0.1748	0.0139	0.1748	C	-8.462	-0.0424833	0.00502048	2.624e-17	??+-?---?	275048	17.1	4.824	4	0.3059
4	99400286	rs4699748	A	G	0.1434	0.0171	0.1434	A	6.038	0.0264047	0.00437309	1.557e-09	+?+--+++?	425692	38.5	9.759	6	0.1352
4	99400416	rs2584461	T	C	0.2348	0.0747	0.2348	T	-7.818	-0.0286139	0.00366001	5.358e-15	-?+-?---?	415492	76.3	21.118	5	0.0007694
4	99400949	rs17028965	T	C	0.2318	0.0704	0.2318	T	-7.965	-0.0292827	0.00367642	1.649e-15	-?+-?---?	415492	75.8	20.673	5	0.0009339
4	99420704	rs971074	T	C	0.1094	0.0125	0.1094	T	-6.165	-0.0291731	0.00473205	7.069e-10	----+----	458355	67.5	24.583	8	0.001829
4	99421462	rs111540153	A	G	0.1099	0.0131	0.1099	A	-6.49	-0.031033	0.00478166	8.571e-11	----?---?	447101	65.1	17.207	6	0.008553
4	99423428	rs534543305	T	C	0.0615	0.0008	0.0615	T	-12.347	-0.093846	0.00760071	5.04e-35	?-????--?	299904	89.7	19.473	2	5.908e-05
4	99425976	rs80329335	A	T	0.7806	0.0068	0.2194	T	5.999	0.02579	0.00429905	1.987e-09	?+++--++?	315929	56.2	13.686	6	0.03335
4	99427526	rs111558838	T	C	0.9467	0.0115	0.0533	C	12.584	0.0837292	0.00665362	2.579e-36	++++?++++	447656	78.3	32.223	7	3.693e-05
4	99428047	rs75076500	A	C	0.9467	0.0115	0.0533	C	12.59	0.0837691	0.00665362	2.407e-36	++++?++++	447656	78.2	32.108	7	3.878e-05
4	99428512	rs1573496	C	G	0.943	0.0144	0.057	G	6.845	0.150878	0.0220421	7.648e-12	?+++?+???	38292	0	0.221	3	0.9741
4	99430279	rs17529509	A	C	0.0675	0.0165	0.0675	A	-9.145	-0.0565491	0.00618361	5.946e-20	-?--?---?	415492	13.6	5.79	5	0.3272
4	99430290	rs112941647	T	C	0.9468	0.0113	0.0532	C	12.49	0.0831788	0.00665963	8.482e-36	++++?++++	447641	77.9	31.716	7	4.584e-05
4	99430960	rs113954211	A	C	0.0691	0.018	0.0691	A	-10.737	-0.0632625	0.00589201	6.825e-27	----?----	447808	70.5	23.764	7	0.001253
4	99431951	rs111325698	C	G	0.9391	0.0029	0.0609	G	12.416	0.0938169	0.00755613	2.134e-35	?+++?+++?	306247	74.6	19.723	5	0.001409
4	99432854	rs1154467	A	T	0.8201	0.0108	0.1799	T	5.729	0.0284397	0.00496417	1.012e-08	??++?+++?	275048	0	1.236	4	0.8721
4	99433295	rs138499870	T	TTTATAAATTG	0.047	0.01	0.047	T	-8.017	-0.192877	0.0240585	1.082e-15	?---?-??-	38572	0	3.721	4	0.4451
4	99435427	rs34925826	A	G	0.9466	0.0115	0.0534	G	12.574	0.0835893	0.00664779	2.922e-36	++++?++++	447649	77.5	31.17	7	5.785e-05
4	99438351	rs80249729	A	G	0.0534	0.0115	0.0534	A	-12.58	-0.0836303	0.00664788	2.713e-36	----?----	447637	77.8	31.599	7	4.818e-05
4	99438939	rs78139295	A	G	0.9466	0.0115	0.0534	G	12.552	0.0835329	0.00665494	3.879e-36	++++?+++?	446687	81	31.526	6	2.011e-05
4	99447629	rs17589306	T	C	0.9308	0.0179	0.0692	C	10.646	0.0627063	0.00589013	1.821e-26	++++?++++	447495	67.4	21.455	7	0.003153
4	99449527	rs200191165	G	GT	0.9779	0.0056	0.0221	GT	9.312	0.325595	0.0349651	1.249e-20	?+-+?+???	37848	82.7	17.33	3	0.0006044
4	99451674	rs2119889	T	G	0.0534	0.0115	0.0534	T	-12.52	-0.0832411	0.00664865	5.783e-36	----?----	447533	76	29.132	7	0.0001369
4	99451819	rs2165672	A	C	0.9309	0.0179	0.0691	C	10.649	0.0627657	0.00589404	1.756e-26	++++?++++	447499	67.3	21.419	7	0.003197
4	99452677	rs75505416	T	C	0.9309	0.0179	0.0691	C	10.645	0.0627421	0.00589404	1.841e-26	++++?++++	447499	67.3	21.419	7	0.003197
4	99455179	rs76571809	A	C	0.0534	0.0115	0.0534	A	-12.487	-0.0830217	0.00664865	8.783e-36	----?----	447533	76.2	29.386	7	0.000123
4	99457910	rs113685321	T	C	0.9308	0.0178	0.0692	C	10.612	0.0625058	0.0058901	2.625e-26	++++?++++	447499	67.3	21.399	7	0.003222
4	99462539	rs77324539	A	G	0.9305	0.018	0.0695	G	10.745	0.0631821	0.00588014	6.223e-27	++++?++++	447222	68.5	22.194	7	0.002352
4	99463667	rs78369570	A	G	0.0533	0.0115	0.0533	A	-12.506	-0.0832357	0.00665566	6.904e-36	----?----	447382	75.5	28.528	7	0.0001763
4	99465296	rs75759220	C	G	0.9387	0.0031	0.0613	G	12.162	0.091514	0.00752458	4.968e-34	?+++?++++	306936	66.7	18.039	6	0.006136
4	99465672	rs115163375	T	C	0.069	0.0179	0.069	T	-10.735	-0.0633346	0.00589982	6.947e-27	----?----	447222	68.5	22.202	7	0.002344
4	99471487	rs72905000	A	G	0.0981	0.0119	0.0981	A	-7.353	-0.0369979	0.00503167	1.942e-13	----?---?	446424	70	20.033	6	0.002732
4	99474257	rs148915469	A	C	0.9682	0.0061	0.0318	C	16.206	0.138159	0.00852516	4.61e-59	++-+?+++?	446892	86.5	44.311	6	6.412e-08
4	99478486	rs146022132	T	C	0.9682	0.0061	0.0318	C	16.201	0.138116	0.00852516	4.977e-59	++-+?+++?	446892	86.5	44.375	6	6.228e-08
4	99478588	rs1442483	T	C	0.0622	0.0124	0.0622	T	-10.217	-0.0625522	0.00612236	1.664e-24	---++----	457363	81.9	44.19	8	5.239e-07
4	99484024	rs12645746	T	C	0.105	0.0149	0.105	T	-8.014	-0.0391535	0.00488564	1.107e-15	----?---?	445805	70.2	20.107	6	0.00265
4	99485464	rs113445331	A	T	0.0359	0.0019	0.0359	A	-15.908	-0.154452	0.00970909	5.6e-57	?-+-?---?	306497	79.2	24.011	5	0.0002161
4	99485865	rs1583971	A	T	0.1651	0.008	0.1651	A	-6.766	-0.0347486	0.00513576	1.326e-11	??--?+--?	275048	0	1.716	4	0.7877
4	99486375	rs111986524	A	G	0.0478	0.012	0.0478	A	-12.946	-0.0906923	0.00700543	2.486e-38	----?----	447687	74.3	27.256	7	0.0002997
4	99486407	rs111501847	T	G	0.0319	0.0061	0.0319	T	-16.255	-0.138359	0.00851176	2.072e-59	--+-?---?	446941	86.3	43.825	6	8.007e-08
4	99487037	rs1969097	A	C	0.9525	0.0124	0.0475	C	13.058	0.0917509	0.00702641	5.697e-39	++++?++++	447687	73.3	26.202	7	0.0004634
4	99487817	rs111466094	T	C	0.0322	0.0063	0.0322	T	-16.191	-0.1372	0.00847381	5.83e-59	--+-?---?	446890	86.2	43.569	6	8.997e-08
4	99488110	rs114719272	A	G	0.952	0.0126	0.048	G	12.818	0.0896203	0.00699176	1.294e-37	++++?++++	447661	71.4	24.443	7	0.0009521
4	99489065	rs7693958	A	C	0.1104	0.0168	0.1104	A	-6.335	-0.0313605	0.00495036	2.379e-10	-?--?+--?	415492	50	9.995	5	0.07539
4	99489490	rs7677546	T	C	0.8569	0.0153	0.1431	C	6.296	0.0269266	0.00427678	3.045e-10	++++?+++?	445857	71.6	21.125	6	0.001742
4	99490219	rs116245649	T	C	0.0475	0.0124	0.0475	T	-13.054	-0.091724	0.0070265	6.006e-39	----?----	447675	73.4	26.283	7	0.0004483
4	99491163	rs115337753	A	C	0.9525	0.0124	0.0475	C	13.067	0.0918141	0.00702641	5.082e-39	++++?++++	447687	73.2	26.131	7	0.0004772
4	99493168	rs181163639	A	C	0.9686	0.0058	0.0314	C	16.294	0.139754	0.00857705	1.087e-59	++-+?+++?	446941	86.4	44.176	6	6.82e-08
4	99493170	rs184626578	A	G	0.9686	0.0057	0.0314	G	16.293	0.139746	0.00857705	1.102e-59	++-+?+++?	446941	86.4	44.192	6	6.771e-08
4	99493172	rs188895182	A	G	0.9686	0.0058	0.0314	G	16.294	0.139754	0.00857705	1.082e-59	++-+?+++?	446941	86.4	44.171	6	6.835e-08
4	99493313	rs112284057	A	T	0.8788	0.0067	0.1212	T	6.772	0.0395655	0.00584251	1.269e-11	??++?-++?	275048	0	0.911	4	0.9229
4	99493408	rs150918939	T	G	0.0319	0.0061	0.0319	T	-16.245	-0.138274	0.00851176	2.428e-59	--+-?---?	446941	86.4	43.983	6	7.45e-08
4	99493743	rs150052475	A	C	0.9681	0.0061	0.0319	C	16.245	0.138274	0.00851176	2.426e-59	++-+?+++?	446941	86.4	43.982	6	7.452e-08
4	99493872	rs190653003	A	G	0.0319	0.0061	0.0319	A	-16.245	-0.138274	0.00851176	2.429e-59	--+-?---?	446941	86.4	43.982	6	7.452e-08
4	99494080	rs146748718	T	C	0.0319	0.0061	0.0319	T	-16.242	-0.138248	0.00851176	2.562e-59	--+-?---?	446941	86.4	44.03	6	7.293e-08
4	99494278	rs116040762	A	G	0.952	0.0126	0.048	G	12.809	0.0895574	0.00699176	1.455e-37	++++?++++	447661	71.4	24.507	7	0.0009274
4	99494326	rs143722705	A	G	0.9681	0.0061	0.0319	G	16.246	0.138282	0.00851176	2.388e-59	++-+?+++?	446941	86.4	43.972	6	7.487e-08
4	99494578	rs111452034	T	C	0.105	0.015	0.105	T	-7.796	-0.0380878	0.00488555	6.369e-15	----?---?	445821	70.2	20.128	6	0.002628
4	99494944	rs141891093	T	C	0.105	0.015	0.105	T	-7.795	-0.0380829	0.00488555	6.425e-15	----?---?	445821	70.2	20.134	6	0.002621
4	99495098	rs189292015	C	G	0.0361	0.002	0.0361	C	-15.965	-0.154592	0.00968316	2.236e-57	?-+-?---?	306497	79.1	23.897	5	0.0002272
4	99495099	rs149476309	A	G	0.0319	0.0061	0.0319	A	-16.245	-0.138274	0.00851176	2.415e-59	--+-?---?	446941	86.4	43.986	6	7.439e-08
4	99495179	rs112165841	A	G	0.1008	0.0131	0.1008	A	-6.961	-0.0346097	0.00497194	3.381e-12	----?---?	446305	70.8	20.529	6	0.002229
4	99495808	rs28782314	A	G	0.1058	0.0153	0.1058	A	-6.659	-0.0335867	0.00504381	2.765e-11	-?--?---?	415492	50.5	10.099	5	0.07247
4	99496007	rs147923359	C	G	0.0573	0.0034	0.0573	C	-12.41	-0.0963357	0.00776275	2.316e-35	?---?----	307214	56.1	13.673	6	0.03351
4	99496950	rs191677672	T	C	0.9525	0.0124	0.0475	C	13.039	0.0916174	0.00702641	7.356e-39	++++?++++	447687	73.4	26.338	7	0.0004382
4	99497196	rs145234718	T	C	0.9676	0.0063	0.0324	C	15.954	0.134783	0.00844826	2.67e-57	++-+?+++?	446915	85.2	40.568	6	3.522e-07
4	99498387	rs111741780	A	G	0.0475	0.0124	0.0475	A	-12.994	-0.0913013	0.00702642	1.318e-38	----?----	447686	72.8	25.759	7	0.0005561
4	99498582	rs111569429	T	C	0.9681	0.0061	0.0319	C	16.247	0.138291	0.00851176	2.354e-59	++-+?+++?	446941	86.4	43.975	6	7.478e-08
4	99500665	rs78111280	T	C	0.1049	0.0149	0.1049	T	-7.785	-0.03805	0.0048876	6.948e-15	----?---?	445822	70.1	20.086	6	0.002674
4	99501688	rs112551978	A	G	0.952	0.0126	0.048	G	12.793	0.0894592	0.00699283	1.789e-37	++++?++++	447524	69.6	23.007	7	0.0017
4	99502293	rs1553432	A	G	0.9507	0.0129	0.0493	G	12.839	0.0886495	0.00690471	9.886e-38	++++?++++	447527	70.5	23.742	7	0.001265
4	99502483	rs1553433	A	G	0.0337	0.0066	0.0337	A	-15.856	-0.131435	0.00828931	1.268e-56	--+-?---?	446911	85	39.991	6	4.573e-07
4	99503048	rs79623823	T	C	0.0493	0.0129	0.0493	T	-12.851	-0.0887312	0.00690461	8.516e-38	----?----	447539	70.3	23.594	7	0.001342
4	99504070	rs2083685	T	C	0.888	0.0172	0.112	C	6.329	0.0311342	0.0049193	2.463e-10	+?++?-++?	415492	49.3	9.858	5	0.07937
4	99504254	rs72906741	T	G	0.9332	0.0189	0.0668	G	8.691	0.0540024	0.0062136	3.606e-18	+?++?+++?	415492	25.3	6.69	5	0.2447
4	99504282	rs75720090	T	C	0.9608	0.0082	0.0392	C	12.663	0.101227	0.00799391	9.533e-37	+?--?+++?	415492	70.3	16.821	5	0.004851
4	99505317	rs112953352	A	T	0.9419	0.0034	0.0581	T	12.395	0.0956136	0.00771389	2.769e-35	?+++?++++	307095	54.5	13.197	6	0.04001
4	99505912	rs113668215	A	C	0.0333	0.0063	0.0333	A	-15.797	-0.131703	0.00833722	3.279e-56	--+-?---?	446911	84.9	39.622	6	5.404e-07
4	99506234	rs112700143	A	G	0.9508	0.0128	0.0492	G	12.863	0.0888996	0.00691126	7.291e-38	++++?++++	447539	70.3	23.553	7	0.001365
4	99506950	rs76156384	A	G	0.061	0.0171	0.061	A	-10.971	-0.068615	0.00625421	5.28e-28	----?---?	446333	75.1	24.051	6	0.000511
4	99506997	rs111510363	T	G	0.9663	0.0066	0.0337	G	15.865	0.13151	0.00828931	1.1e-56	++-+?+++?	446911	84.9	39.843	6	4.891e-07
4	99507078	rs72906743	C	G	0.0735	0.0054	0.0735	C	-10.846	-0.0751528	0.00692908	2.081e-27	?---?---?	305855	56.8	11.587	5	0.0409
4	99507503	rs12509265	C	G	0.1233	0.0068	0.1233	C	-6.837	-0.039651	0.00579948	8.096e-12	??--?+--?	275048	0	1.19	4	0.8798
4	99507785	rs76478971	A	G	0.9507	0.0129	0.0493	G	12.845	0.0886898	0.00690461	9.205e-38	++++?++++	447539	70.2	23.514	7	0.001386
4	99508169	rs78625750	A	G	0.892	0.0155	0.108	G	5.47	0.0273408	0.00499832	4.503e-08	+?++?-++?	415492	41	8.473	5	0.132
4	99508362	rs77471916	A	G	0.0492	0.0128	0.0492	A	-12.929	-0.0893557	0.00691126	3.104e-38	----?----	447539	70.5	23.693	7	0.00129
4	99508924	rs113902949	A	G	0.0491	0.0128	0.0491	A	-12.813	-0.0886395	0.00691793	1.392e-37	----?----	447539	70.1	23.427	7	0.001436
4	99509086	rs72906745	T	C	0.061	0.0171	0.061	T	-10.976	-0.0686463	0.00625421	4.986e-28	----?---?	446333	75	24.044	6	0.0005126
4	99509159	rs1503775	A	G	0.1118	0.0171	0.1118	A	-6.353	-0.0312767	0.00492314	2.11e-10	-?--?+--?	415492	50.7	10.148	5	0.07114
4	99509272	rs112531168	A	G	0.9663	0.0066	0.0337	G	15.864	0.131502	0.00828931	1.128e-56	++-+?+++?	446911	84.9	39.839	6	4.899e-07
4	99509561	rs72906751	T	C	0.9392	0.0171	0.0608	C	11.066	0.0693149	0.00626377	1.835e-28	++++?+++?	446341	75.2	24.201	6	0.0004796
4	99509767	rs7669241	A	G	0.1122	0.0171	0.1122	A	-6.324	-0.0310854	0.00491547	2.546e-10	-?--?+--?	415492	48.8	9.775	5	0.08187
4	99509773	rs75670102	T	C	0.939	0.0171	0.061	C	10.974	0.0686338	0.00625421	5.116e-28	++++?+++?	446333	75	24.038	6	0.0005139
4	99510009	rs78908724	T	C	0.9663	0.0066	0.0337	C	15.86	0.131469	0.00828931	1.19e-56	++-+?+++?	446911	85	39.893	6	4.781e-07
4	99510142	rs77107880	A	T	0.9617	0.0021	0.0383	T	15.535	0.146218	0.00941215	2.001e-54	?+-+?+++?	306467	76.9	21.625	5	0.0006168
4	99510190	rs72906756	T	C	0.939	0.0172	0.061	C	10.991	0.0687401	0.00625421	4.214e-28	++++?+++?	446333	74.9	23.898	6	0.0005453
4	99511426	rs112790221	T	C	0.9663	0.0066	0.0337	C	15.882	0.131651	0.00828931	8.509e-57	++-+?+++?	446911	84.9	39.691	6	5.237e-07
4	99511555	rs113227503	C	G	0.9417	0.0034	0.0583	G	12.454	0.095914	0.00770146	1.324e-35	?+++?++++	307095	53.8	12.993	6	0.04316
4	99512139	rs74826603	A	T	0.9417	0.0034	0.0583	T	12.458	0.0959448	0.00770146	1.269e-35	?+++?++++	307095	53.7	12.951	6	0.04382
4	99512327	rs75674620	A	G	0.0493	0.0129	0.0493	A	-12.851	-0.0887312	0.00690461	8.49e-38	----?----	447539	70.1	23.42	7	0.00144
4	99512579	rs78510748	A	C	0.9507	0.0129	0.0493	C	12.851	0.0887312	0.00690461	8.499e-38	++++?++++	447539	70.1	23.42	7	0.00144
4	99514202	rs112430106	A	G	0.9663	0.0066	0.0337	G	15.87	0.131551	0.00828931	1.02e-56	++-+?+++?	446911	85	39.956	6	4.646e-07
4	99514583	rs140702174	A	T	0.0383	0.002	0.0383	A	-15.556	-0.146415	0.00941215	1.449e-54	?-+-?---?	306467	76.7	21.43	5	0.0006716
4	99514669	rs1847370	A	G	0.0623	0.0176	0.0623	A	-11.18	-0.0691666	0.00618664	5.137e-29	----?----	447238	70.4	23.684	7	0.001295
4	99514894	rs1847371	T	C	0.9377	0.0176	0.0623	C	11.182	0.069179	0.00618664	5.002e-29	++++?++++	447238	70.4	23.687	7	0.001293
4	99514910	rs1847372	T	C	0.0623	0.0176	0.0623	T	-11.18	-0.0691666	0.00618664	5.105e-29	----?----	447238	70.5	23.705	7	0.001284
4	99515075	rs1847373	A	T	0.0744	0.0056	0.0744	A	-11.285	-0.077639	0.00687984	1.564e-29	?---?----	306794	43.5	10.624	6	0.1007
4	99515887	rs72906763	T	C	0.9394	0.017	0.0606	C	11.032	0.0692089	0.00627346	2.664e-28	++++?+++?	446336	74.6	23.635	6	0.0006094
4	99516644	rs72906765	A	G	0.9394	0.0169	0.0606	G	11.021	0.0691399	0.00627346	3.041e-28	++++?+++?	446336	74.6	23.612	6	0.0006153
4	99516730	rs112102006	A	G	0.0337	0.0066	0.0337	A	-15.91	-0.131883	0.00828931	5.418e-57	--+-?---?	446911	84.9	39.842	6	4.892e-07
4	99518757	rs78911191	A	G	0.0337	0.0065	0.0337	A	-15.987	-0.132523	0.0082894	1.57e-57	--+-?---?	446902	84.7	39.242	6	6.416e-07
4	99520649	rs112303289	A	G	0.9663	0.0066	0.0337	G	15.979	0.132455	0.00828931	1.785e-57	++-+?+++?	446911	84.7	39.098	6	6.848e-07
4	99520729	rs1354368	A	G	0.3029	0.0714	0.3029	A	-5.559	-0.0181116	0.00325806	2.721e-08	--++?---?	446157	36.9	9.503	6	0.1472
4	99521914	rs112724250	A	G	0.0337	0.0066	0.0337	A	-15.979	-0.132455	0.00828931	1.783e-57	--+-?---?	446911	84.6	39.061	6	6.964e-07
4	99523681	rs111939282	T	C	0.9634	0.0077	0.0366	C	14.82	0.116744	0.00787747	1.081e-49	++-+-+++?	457024	88.3	60.082	7	1.454e-10
4	99523906	rs72906779	T	C	0.9601	0.0089	0.0399	C	15.02	0.114691	0.0076359	5.392e-51	++--?++++	447703	83.4	42.188	7	4.784e-07
4	99526076	rs112114454	T	C	0.0319	0.0062	0.0319	T	-16.827	-0.143235	0.00851223	1.539e-63	--+-?---?	446892	85	39.966	6	4.627e-07
4	99527501	rs113389669	C	G	0.0361	0.002	0.0361	C	-16.104	-0.155958	0.00968443	2.411e-58	?-+-?---?	306417	78.3	23.068	5	0.0003276
4	99529800	rs41275703	A	G	0.9681	0.0062	0.0319	G	16.727	0.142389	0.00851252	8.336e-63	++-+?+++?	446861	84	37.604	6	1.343e-06
4	99530238	rs112352710	T	C	0.0324	0.0066	0.0324	T	-16.538	-0.139727	0.00844883	1.967e-61	--+-?---?	446854	83.2	35.798	6	3.018e-06
4	99530624	rs188726265	T	C	0.023	0.0035	0.023	T	-18.53	-0.184878	0.00997721	1.177e-76	--+-?---?	447053	86.5	44.393	6	6.179e-08
4	99535845	rs111307169	T	C	0.9681	0.0062	0.0319	C	16.66	0.141822	0.00851274	2.571e-62	++-+?+++?	446838	83.5	36.337	6	2.371e-06
4	99537616	rs112527495	A	G	0.9681	0.0062	0.0319	G	16.649	0.141729	0.00851274	3.086e-62	++-+?+++?	446838	83.4	36.245	6	2.47e-06
4	99539374	rs41275705	A	G	0.9681	0.0062	0.0319	G	16.639	0.141644	0.00851274	3.608e-62	++-+?+++?	446838	83.4	36.198	6	2.523e-06
4	99539681	rs145014024	T	C	0.9684	0.006	0.0316	C	16.585	0.14183	0.00855169	8.874e-62	++-+?+++?	446842	83.4	36.091	6	2.646e-06
4	99543447	rs113019310	T	C	0.0318	0.0062	0.0318	T	-16.724	-0.142583	0.00852564	8.796e-63	--+-?---?	446842	83.6	36.538	6	2.166e-06
4	99544416	rs543669349	T	G	0.9769	0.0037	0.0231	G	18.475	0.183946	0.00995651	3.278e-76	++-+?+++?	447017	86.3	43.821	6	8.023e-08
4	99550033	rs112954724	T	G	0.9682	0.0062	0.0318	G	16.623	0.141722	0.00852563	4.756e-62	++-+?+++?	446843	83.3	35.925	6	2.851e-06
4	99553022	rs147825380	A	C	0.977	0.0035	0.023	C	18.486	0.184447	0.00997765	2.669e-76	++-+?+++?	447014	86.1	43.102	6	1.114e-07
4	99553183	rs111694387	T	G	0.9682	0.0062	0.0318	G	16.618	0.141679	0.00852563	5.124e-62	++-+?+++?	446843	83.3	35.909	6	2.872e-06
4	99554417	rs112576392	A	G	0.9682	0.0062	0.0318	G	16.615	0.141653	0.00852563	5.448e-62	++-+?+++?	446843	83.3	35.913	6	2.866e-06
4	99560520	rs75860085	A	T	0.9639	0.002	0.0361	T	15.86	0.1536	0.00968471	1.196e-56	?+-+?+++?	306399	77	21.725	5	0.0005905
4	99562114	rs191253898	T	C	0.9682	0.0062	0.0318	C	16.605	0.141568	0.00852563	6.451e-62	++-+?+++?	446843	83.3	35.838	6	2.964e-06
4	99563133	rs7682548	T	C	0.8046	0.0538	0.1954	C	5.601	0.0209148	0.00373412	2.133e-08	++---+++?	456161	49.1	13.756	7	0.05569
4	99563386	rs10026790	A	G	0.1954	0.0538	0.1954	A	-5.676	-0.0214359	0.00377659	1.381e-08	--++?---?	445960	53.1	12.785	6	0.04657
4	99564098	rs11944752	A	G	0.1953	0.0537	0.1953	A	-5.608	-0.0209453	0.00373489	2.048e-08	--+++---?	456150	49.5	13.858	7	0.05376
4	99565322	rs7687762	T	C	0.195	0.0535	0.195	T	-5.567	-0.020804	0.00373702	2.591e-08	--+++---?	456162	49.1	13.754	7	0.05573
4	99566106	rs28473262	A	G	0.8047	0.0537	0.1953	G	5.664	0.0213947	0.00377731	1.483e-08	++--?+++?	445962	53.1	12.793	6	0.04645
4	99566158	rs28431971	A	G	0.1957	0.0539	0.1957	A	-5.64	-0.0212877	0.00377441	1.703e-08	--++?---?	445957	53.3	12.835	6	0.04573
4	99566213	rs28497720	T	C	0.1954	0.0538	0.1954	T	-5.575	-0.0208177	0.00373412	2.477e-08	--+++---?	456162	49.6	13.898	7	0.05303
4	99566431	rs113034137	A	G	0.0317	0.0062	0.0317	A	-16.551	-0.141317	0.00853827	1.569e-61	--+-?---?	446880	82.7	34.673	6	4.985e-06
4	99568047	rs11943031	A	G	0.1954	0.0538	0.1954	A	-5.66	-0.0213757	0.00377663	1.513e-08	--++?---?	445951	52.5	12.64	6	0.04913
4	99568081	rs11933937	A	G	0.8046	0.0538	0.1954	G	5.57	0.0207993	0.00373416	2.541e-08	++---+++?	456151	48.6	13.628	7	0.0582
4	99568373	rs111787230	A	G	0.968	0.0063	0.032	G	16.507	0.140301	0.00849947	3.26e-61	++-+?+++?	446880	82.7	34.729	6	4.864e-06
4	99568838	rs28849180	T	C	0.1954	0.0538	0.1954	T	-5.591	-0.0208775	0.00373413	2.254e-08	--+++---?	456160	49.7	13.908	7	0.05285
4	99570352	rs11933250	T	C	0.8052	0.0533	0.1948	C	5.474	0.0204644	0.00373848	4.406e-08	++---+++?	456160	48.5	13.591	7	0.05896
4	99570523	rs11946658	A	C	0.1955	0.0539	0.1955	A	-5.624	-0.0209967	0.00373341	1.863e-08	--+++---?	456159	49.5	13.869	7	0.05357
4	99571032	rs11933520	T	C	0.8047	0.0538	0.1953	C	5.691	0.0214967	0.00377731	1.266e-08	++--?+++?	445962	53.3	12.857	6	0.04536
4	99571660	rs6839296	A	G	0.1952	0.0536	0.1952	A	-5.595	-0.0209005	0.00373557	2.21e-08	--+++---?	456162	48.9	13.708	7	0.05663
4	99574331	rs1800591	T	G	0.1954	0.0538	0.1954	T	-5.614	-0.0209633	0.00373412	1.979e-08	--+++---?	456162	49.2	13.783	7	0.05518
4	99574660	rs1800804	T	C	0.8046	0.0538	0.1954	C	5.608	0.0209409	0.00373412	2.042e-08	++---+++?	456162	49.3	13.818	7	0.05451
4	99575906	rs11937273	A	C	0.8047	0.0538	0.1953	C	5.596	0.0209002	0.00373484	2.193e-08	++---+++?	456162	49.4	13.824	7	0.0544
4	99576030	rs28666735	T	C	0.8049	0.0536	0.1951	C	5.663	0.0213992	0.00377878	1.487e-08	++--?+++?	445962	53.4	12.876	6	0.04505
4	99576421	rs11947558	T	C	0.1954	0.0538	0.1954	T	-5.615	-0.0209671	0.00373412	1.966e-08	--+++---?	456162	49.3	13.809	7	0.05468
4	99576502	rs113004476	T	C	0.0363	0.0009	0.0363	T	-15.876	-0.154968	0.00976113	9.286e-57	?-????--?	300021	83.4	12.031	2	0.002441
4	99578179	rs28435607	A	C	0.8046	0.0538	0.1954	C	5.631	0.0210268	0.00373412	1.791e-08	++---+++?	456162	49.3	13.798	7	0.05489
4	99578396	rs76006141	T	C	0.9682	0.0062	0.0318	C	16.542	0.141025	0.00852528	1.824e-61	++-+?+++?	446880	82.8	34.878	6	4.55e-06
4	99578816	rs28376611	A	G	0.1954	0.0538	0.1954	A	-5.618	-0.0209783	0.00373412	1.93e-08	--+++---?	456162	49.1	13.762	7	0.05558
4	99578973	rs7693203	T	C	0.1954	0.0538	0.1954	T	-5.618	-0.0209783	0.00373412	1.937e-08	--+++---?	456162	49.2	13.785	7	0.05515
4	99579618	rs28647519	T	C	0.1954	0.0538	0.1954	T	-5.652	-0.021102	0.00373354	1.583e-08	--+++---?	456304	49.6	13.878	7	0.0534
4	99580533	rs6841211	T	C	0.8051	0.0534	0.1949	C	5.77	0.0218086	0.00377965	7.947e-09	++--?+++?	446104	54.1	13.069	6	0.04196
4	99581665	rs28595160	T	G	0.1954	0.0538	0.1954	T	-5.711	-0.0215646	0.00377598	1.126e-08	--++?---?	446104	54.4	13.158	6	0.04059
4	99582604	rs11937107	T	C	0.1953	0.0538	0.1953	T	-5.648	-0.021091	0.00373424	1.621e-08	--+++---?	456310	51	14.296	7	0.04616
4	99583507	rs3816873	T	C	0.8047	0.0537	0.1953	C	5.619	0.0209808	0.0037339	1.918e-08	++---+++?	456393	47.9	13.442	7	0.06204
4	99583751	rs151253743	A	G	0.0318	0.0063	0.0318	A	-16.526	-0.140884	0.00852498	2.365e-61	--+-?---?	446911	82.3	33.896	6	7.047e-06
4	99583980	rs1057615	A	G	0.8046	0.0538	0.1954	G	5.602	0.0209121	0.00373297	2.121e-08	++---+++?	456444	48	13.473	7	0.06139
4	99585111	rs113287401	A	G	0.9682	0.0062	0.0318	G	16.512	0.140764	0.00852498	2.997e-61	++-+?+++?	446911	82.4	34.094	6	6.452e-06
4	99587387	rs2035815	T	C	0.9143	0.0258	0.0857	C	7.366	0.040287	0.00546932	1.76e-13	+?-+-++++	426642	61.8	18.333	7	0.01056
4	99587399	rs2035816	A	G	0.9315	0.019	0.0685	G	8.588	0.0520503	0.00606082	8.858e-18	+?---++++	426642	69.7	23.116	7	0.001627
4	99588010	rs17533020	A	G	0.9141	0.026	0.0859	G	7.839	0.0433501	0.00553005	4.552e-15	+?-+?++++	416442	10.9	6.734	6	0.3462
4	99588164	rs17029173	T	G	0.874	0.0373	0.126	G	5.846	0.0273298	0.00467496	5.027e-09	+?+-?+++?	415492	18.2	6.111	5	0.2956
4	99590256	rs112108820	T	C	0.0864	0.0263	0.0864	T	-7.326	-0.0399209	0.00544921	2.379e-13	-?+-+----	426642	62.8	18.807	7	0.008815
4	99591692	rs113557405	T	C	0.9682	0.0063	0.0318	C	16.62	0.141666	0.00852381	4.966e-62	++-+?+++?	447034	84.2	37.931	6	1.159e-06
4	99592389	rs144319557	A	G	0.0313	0.0059	0.0313	A	-16.564	-0.142275	0.0085894	1.265e-61	--+-?---?	447034	84	37.438	6	1.447e-06
4	99592537	rs114505328	A	T	0.1041	0.0063	0.1041	A	-6.319	-0.0386776	0.00612085	2.631e-10	??+-+----	286198	67	18.165	6	0.005833
4	99592895	rs148766065	T	C	0.0318	0.0062	0.0318	T	-16.658	-0.141986	0.00852358	2.627e-62	--+-?---?	447058	84.2	38.071	6	1.088e-06
4	99593207	rs150849944	T	C	0.0318	0.0063	0.0318	T	-16.672	-0.142105	0.00852358	2.093e-62	--+-?---?	447058	84.2	37.922	6	1.163e-06
4	99595223	rs2130906	A	T	0.0361	0.002	0.0361	A	-15.929	-0.154214	0.00968132	4.006e-57	?-+-?---?	306614	78.8	23.606	5	0.0002585
4	99595501	rs2130907	A	C	0.0318	0.0062	0.0318	A	-16.657	-0.141977	0.00852358	2.683e-62	--+-?---?	447058	84.3	38.101	6	1.074e-06
4	99595848	rs2903202	A	T	0.8958	0.0063	0.1042	T	6.325	0.0386979	0.00611825	2.534e-10	??-+-++++	286198	67.3	18.325	6	0.005469
4	99595987	rs79606973	A	T	0.104	0.0063	0.104	A	-6.254	-0.038296	0.00612345	4.004e-10	??+-+----	286198	67	18.157	6	0.005852
4	99597126	rs17533489	T	C	0.9142	0.0259	0.0858	C	7.356	0.0402111	0.00546643	1.899e-13	+?-+-++++	426642	61.9	18.391	7	0.01033
4	99597326	rs79194015	A	T	0.8958	0.0063	0.1042	T	6.33	0.0387285	0.00611825	2.45e-10	??-+-++++	286198	67.1	18.235	6	0.00567
4	99597557	rs77290806	T	G	0.9682	0.0062	0.0318	G	16.658	0.141986	0.00852358	2.653e-62	++-+?+++?	447058	84.3	38.1	6	1.074e-06
4	99598791	rs2035814	A	G	0.9144	0.0259	0.0856	G	7.412	0.0405601	0.00547222	1.241e-13	+?-+-++++	426642	61.7	18.266	7	0.01083
4	99599255	rs111441437	A	T	0.1043	0.0063	0.1043	A	-6.341	-0.0387794	0.00611566	2.282e-10	??+-+----	286198	66.9	18.11	6	0.005962
4	99599453	rs2035813	A	G	0.9682	0.0062	0.0318	G	16.683	0.142193	0.00852322	1.751e-62	++-+?+++?	447096	84.5	38.799	6	7.836e-07
4	99600480	rs17533517	T	C	0.0848	0.0253	0.0848	T	-7.241	-0.0397934	0.00549556	4.443e-13	-?+-+----	426642	60.5	17.73	7	0.01325
4	99602209	rs113911713	T	C	0.914	0.0261	0.086	C	7.372	0.0402561	0.00546067	1.682e-13	+?-+-++++	426642	62	18.434	7	0.01016
4	99602646	rs145855658	A	G	0.0317	0.0062	0.0317	A	-16.66	-0.142213	0.00853621	2.551e-62	--+-?---?	447096	84.5	38.65	6	8.383e-07
4	99606671	rs112125838	T	C	0.0318	0.0062	0.0318	T	-16.508	-0.140662	0.00852083	3.224e-61	--+-?---?	447346	82.2	33.777	6	7.429e-06
4	99607224	rs76819189	T	C	0.086	0.026	0.086	T	-7.404	-0.0404308	0.00546067	1.325e-13	-?+-+----	426642	62.4	18.614	7	0.009485
4	99607794	rs113005789	T	C	0.0318	0.0062	0.0318	T	-16.508	-0.140662	0.00852083	3.199e-61	--+-?---?	447346	82.2	33.777	6	7.429e-06
4	99607928	rs7698547	T	C	0.0861	0.0261	0.0861	T	-7.375	-0.0402512	0.0054578	1.646e-13	-?+-+----	426642	62.3	18.57	7	0.009647
4	99609390	rs111536591	A	G	0.9682	0.0062	0.0318	G	16.509	0.14067	0.00852083	3.172e-61	++-+?+++?	447346	82.2	33.778	6	7.426e-06
4	99609429	rs76877520	A	G	0.0861	0.0261	0.0861	A	-7.381	-0.040284	0.0054578	1.568e-13	-?+-+----	426642	62.3	18.563	7	0.009672
4	99609605	rs112520120	T	C	0.9139	0.0261	0.0861	C	7.376	0.0402567	0.0054578	1.63e-13	+?-+-++++	426642	62.6	18.711	7	0.009143
4	99610840	rs6532823	A	C	0.0861	0.0261	0.0861	A	-7.83	-0.0432547	0.00552423	4.868e-15	-?+-?----	416442	13.2	6.913	6	0.329
4	99611276	rs112568939	T	C	0.0318	0.0062	0.0318	T	-16.51	-0.140679	0.00852083	3.114e-61	--+-?---?	447346	82.2	33.782	6	7.411e-06
4	99611445	rs113337987	A	G	0.0318	0.0062	0.0318	A	-16.51	-0.140679	0.00852083	3.1e-61	--+-?---?	447346	82.2	33.782	6	7.412e-06
4	99611480	rs745075	T	C	0.914	0.026	0.086	C	7.324	0.0400385	0.00546676	2.404e-13	+?-+-+++?	425692	66.2	17.765	6	0.006847
4	99611645	rs745074	A	T	0.1043	0.0063	0.1043	A	-6.361	-0.0389017	0.00611566	2.006e-10	??+-+----	286198	67	18.167	6	0.005828
4	99612339	rs75487972	T	C	0.914	0.026	0.086	C	7.404	0.0404308	0.00546067	1.321e-13	+?-+-++++	426642	62.2	18.5	7	0.009907
4	99612502	rs78189095	T	C	0.0318	0.0062	0.0318	T	-16.509	-0.14067	0.00852083	3.178e-61	--+-?---?	447346	82.2	33.783	6	7.407e-06
4	99612756	rs41275715	T	C	0.086	0.0261	0.086	T	-7.347	-0.0401643	0.00546676	2.024e-13	-?+-+---?	425692	66.2	17.764	6	0.00685
4	99613325	rs1491246	A	T	0.8957	0.0063	0.1043	T	6.36	0.0388956	0.00611566	2.012e-10	??-+-++++	286198	67	18.208	6	0.005734
4	99613397	rs1491245	T	G	0.914	0.0261	0.086	G	7.427	0.0405564	0.00546067	1.114e-13	+?-+-++++	426642	60.9	17.889	7	0.01248
4	99613653	rs79149824	T	C	0.0318	0.0062	0.0318	T	-16.505	-0.140636	0.00852083	3.364e-61	--+-?---?	447346	82.2	33.78	6	7.42e-06
4	99613802	rs76826818	A	G	0.914	0.0261	0.086	G	7.441	0.0406328	0.00546067	1.002e-13	+?-+-++++	426642	62	18.4	7	0.01029
4	99614173	rs111664214	T	C	0.0872	0.0266	0.0872	T	-7.523	-0.0408693	0.00543258	5.363e-14	-?+-+---?	425692	70.9	20.628	6	0.002139
4	99615206	rs7668586	T	C	0.0861	0.0261	0.0861	T	-7.413	-0.0404586	0.0054578	1.231e-13	-?+-+----	426642	61.8	18.338	7	0.01054
4	99615675	rs112205302	A	G	0.0318	0.0062	0.0318	A	-16.466	-0.140304	0.00852083	6.394e-61	--+-?---?	447346	82.2	33.644	6	7.882e-06
4	99617266	rs1491237	A	G	0.9139	0.0261	0.0861	G	7.392	0.040344	0.0054578	1.441e-13	+?-+-++++	426642	61.8	18.347	7	0.0105
4	99617674	rs113880206	A	G	0.9682	0.0062	0.0318	G	16.487	0.14049	0.00852128	4.541e-61	++-+?+++?	447299	82.2	33.749	6	7.521e-06
4	99622961	rs112407688	C	G	0.0361	0.002	0.0361	C	-15.683	-0.151786	0.00967838	1.99e-55	?-+-?---?	306800	74.9	19.898	5	0.001306
4	99624384	rs112925005	T	G	0.0318	0.0062	0.0318	T	-16.463	-0.140294	0.00852181	6.738e-61	--+-?---?	447244	82	33.3	6	9.179e-06
4	99625109	rs151094957	T	G	0.0318	0.0062	0.0318	T	-16.437	-0.140073	0.00852181	1.045e-60	--+-?---?	447244	81.9	33.221	6	9.509e-06
4	99630486	rs113433747	A	G	0.9683	0.0062	0.0317	G	16.398	0.139954	0.0085348	1.987e-60	++-+?+++?	447244	81.9	33.132	6	9.888e-06
4	99631696	rs79660771	A	T	0.964	0.002	0.036	T	15.615	0.15133	0.00969131	5.786e-55	?+-+?+++?	306800	75	20.02	5	0.001239
4	99632984	rs112042103	A	C	0.0236	0.0022	0.0236	A	-8.791	-0.13703	0.0155875	1.485e-18	--+-?-???	178611	84.6	26.059	4	3.08e-05
4	99633873	rs80147669	A	G	0.0313	0.0059	0.0313	A	-16.269	-0.139708	0.00858738	1.649e-59	--+-?---?	447244	81.9	33.123	6	9.93e-06
4	99643519	rs79121650	A	G	0.0316	0.0062	0.0316	A	-16.328	-0.139592	0.00854923	6.276e-60	--+-?---?	447099	82.9	35.043	6	4.227e-06
4	99644472	rs149603825	A	C	0.0316	0.0062	0.0316	A	-16.328	-0.139592	0.00854923	6.2e-60	--+-?---?	447099	82.8	34.964	6	4.38e-06
4	99644882	rs113499158	A	G	0.9694	0.0055	0.0306	G	16.086	0.13968	0.00868332	3.224e-58	++-+?+++?	447099	82.4	34.182	6	6.205e-06
4	99647203	rs111811898	A	G	0.0316	0.0062	0.0316	A	-16.303	-0.139378	0.00854923	9.381e-60	--+-?---?	447099	82.9	35.096	6	4.129e-06
4	99648100	rs112037268	C	G	0.9641	0.002	0.0359	G	15.577	0.1512	0.00970659	1.043e-54	?+-+?+++?	306655	76.6	21.356	5	0.0006938
4	99648285	rs80251526	T	C	0.9684	0.0062	0.0316	C	16.305	0.139395	0.00854923	9.13e-60	++-+?+++?	447099	82.8	34.96	6	4.388e-06
4	99649120	rs113046406	A	G	0.9684	0.0062	0.0316	G	16.297	0.139327	0.00854923	1.042e-59	++-+?+++?	447099	82.9	35.087	6	4.146e-06
4	99653659	rs113550862	T	C	0.9683	0.0063	0.0317	C	16.216	0.138424	0.00853624	3.916e-59	++--?+++?	447093	83.6	36.687	6	2.026e-06
4	99654986	rs112144150	A	G	0.0317	0.0063	0.0317	A	-16.185	-0.138165	0.00853663	6.43e-59	--++?---?	447052	83.7	36.814	6	1.914e-06
4	99656044	rs113836829	T	C	0.0315	0.0062	0.0315	T	-16.185	-0.138582	0.00856235	6.452e-59	--++?---?	447099	83.6	36.574	6	2.131e-06
4	99657218	rs72908758	T	G	0.038	0.0082	0.038	T	-13.895	-0.107513	0.00773754	6.769e-44	--+++---?	456915	85.3	47.462	7	4.535e-08
4	99659504	rs72908762	T	G	0.962	0.0082	0.038	G	13.889	0.107475	0.00773812	7.411e-44	++---+++?	456847	85.2	47.141	7	5.24e-08
4	99662307	rs113795436	T	C	0.0314	0.0061	0.0314	T	-16.138	-0.138392	0.00857553	1.381e-58	--++?---?	447099	83.5	36.35	6	2.357e-06
4	99665014	rs112673132	A	G	0.0314	0.0061	0.0314	A	-16.129	-0.138315	0.00857553	1.586e-58	--++?---?	447099	83.6	36.481	6	2.223e-06
4	99667500	rs200686181	T	TA	0.9722	0.0086	0.0278	TA	7.384	0.230342	0.0311948	1.535e-13	?+--?+???	38022	79.6	14.695	3	0.002097
4	99667670	rs148960385	A	G	0.0227	0.0035	0.0227	A	-18.178	-0.182508	0.0100401	7.687e-74	--++?---?	447171	87	46.263	6	2.624e-08
4	99667969	rs111874202	T	C	0.8842	0.0005	0.1158	C	8.612	0.0509686	0.00591832	7.21e-18	????+?++?	278833	41	3.388	2	0.1838
4	99672384	rs112416204	A	G	0.0316	0.0062	0.0316	A	-16.115	-0.137778	0.00854965	1.995e-58	--++?---?	447055	83.4	36.105	6	2.63e-06
4	99675136	rs112771525	A	G	0.9686	0.0061	0.0314	G	16.116	0.138203	0.00857553	1.968e-58	++--?+++?	447099	83.6	36.578	6	2.128e-06
4	99680159	rs57370858	A	T	0.9086	0.0066	0.0914	T	8.054	0.0532903	0.00661662	7.991e-16	??+-?+++?	275048	48.7	7.801	4	0.09914
4	99683747	rs72910622	A	C	0.9614	0.0085	0.0386	C	13.931	0.108104	0.00775996	4.089e-44	++--?++++	447497	80.1	35.263	7	9.982e-06
4	99684812	rs113142007	T	C	0.9687	0.0061	0.0313	C	16.096	0.138258	0.00858958	2.708e-58	++--?+++?	447015	83.7	36.705	6	2.01e-06
4	99686476	rs6532827	T	G	0.0885	0.0234	0.0885	T	-8.307	-0.0438008	0.00527276	9.78e-17	--++?---?	445886	58.7	14.531	6	0.02424
4	99687126	rs142429199	A	T	0.0347	0.0019	0.0347	A	-15.31	-0.151082	0.00986821	6.515e-53	?-++?---?	306571	78.1	22.879	5	0.000356
4	99687642	rs150848708	A	G	0.0226	0.0034	0.0226	A	-18.169	-0.182797	0.0100609	9.114e-74	--++?---?	447245	87	46.224	6	2.672e-08
4	99689875	rs113136904	A	G	0.0313	0.0061	0.0313	A	-16.085	-0.138163	0.00858958	3.233e-58	--++?---?	447015	83.7	36.751	6	1.969e-06
4	99693120	rs112626323	T	C	0.0313	0.0061	0.0313	T	-16.082	-0.138138	0.00858958	3.402e-58	--++?---?	447015	83.7	36.744	6	1.975e-06
4	99693552	rs112790183	A	G	0.0312	0.006	0.0312	A	-16.074	-0.138283	0.00860289	3.899e-58	--++?---?	447015	83.6	36.681	6	2.031e-06
4	99694408	rs202007692	CT	C	0.9721	0.0087	0.0279	C	7.37	0.229759	0.0311749	1.704e-13	?+--?+???	37938	79.6	14.684	3	0.002108
4	99697734	rs74764239	A	T	0.9646	0.002	0.0354	T	15.42	0.150711	0.0097737	1.197e-53	?+--?+++?	306571	78.1	22.812	5	0.0003668
4	99699898	rs112966321	T	G	0.9687	0.0061	0.0313	G	16.073	0.13806	0.00858958	3.968e-58	++--?+++?	447015	83.7	36.73	6	1.987e-06
4	99701120	rs145117377	A	G	0.9688	0.006	0.0312	G	16.105	0.13855	0.00860289	2.335e-58	++--?+++?	447015	83.6	36.684	6	2.029e-06
4	99715592	rs113952744	T	C	0.9687	0.0061	0.0313	C	16.027	0.137654	0.00858891	8.237e-58	++--?+++?	447085	83.4	36.063	6	2.68e-06
4	99715783	rs113013054	A	T	0.9646	0.002	0.0354	T	15.324	0.149754	0.00977253	5.277e-53	?+--?+++?	306645	77.3	22.07	5	0.0005079
4	99716599	rs1586757	T	C	0.2139	0.0089	0.2139	T	-5.749	-0.0217504	0.00378333	8.958e-09	-?++?+--?	415492	53.3	10.71	5	0.05745
4	99717456	rs79548024	A	G	0.0313	0.0061	0.0313	A	-16.011	-0.137516	0.00858887	1.071e-57	--++?---?	447089	83.2	35.682	6	3.178e-06
4	99745593	rs72684316	A	C	0.8525	0.0468	0.1475	C	7.141	0.0301301	0.00421932	9.243e-13	++-+?-++?	446714	0	4.862	6	0.5617
4	99752453	rs1593581	C	G	0.0094	0.0004	0.0094	C	-12.467	-0.236104	0.0189384	1.125e-35	?-????--?	299426	81.7	10.914	2	0.004265
4	99879247	rs200576590	CT	C	0.0179	0.0074	0.0179	CT	-7.023	-0.271541	0.0386645	2.165e-12	?-++?-???	38051	74.1	11.561	3	0.00905
4	99894958	rs72684365	A	G	0.0504	0.0128	0.0504	A	-8.592	-0.0586915	0.00683094	8.556e-18	---+?----	447783	14.8	8.22	7	0.3136
4	99895109	rs116122817	C	G	0.0529	0.0033	0.0529	C	-9.045	-0.0729827	0.00806885	1.494e-19	?--+?---?	306567	25.3	6.694	5	0.2444
4	99911407	rs140280172	A	C	0.0184	0.003	0.0184	A	-15.307	-0.170327	0.0111274	6.888e-53	--++?---?	447160	81.7	32.792	6	1.15e-05
4	99929131	rs150208378	T	C	0.0185	0.0028	0.0185	T	-15.17	-0.168354	0.0110978	5.606e-52	--++?---?	447159	81.9	33.133	6	9.885e-06
4	99963917	rs77855620	T	C	0.955	0.0111	0.045	C	9.146	0.0659618	0.00721209	5.92e-20	+++-?+++?	447365	45.3	10.959	6	0.08964
4	99963963	rs148382129	T	C	0.0189	0.0033	0.0189	T	-15.299	-0.168011	0.0109818	7.772e-53	--++?---?	447173	80.7	31.152	6	2.371e-05
4	99998097	rs150021439	T	C	0.018	0.0027	0.018	T	-14.986	-0.168563	0.011248	9.015e-51	--++?---?	447161	81.4	32.215	6	1.484e-05
4	100017158	rs76216399	A	G	0.9569	0.0106	0.0431	G	9.544	0.0701998	0.00735538	1.378e-21	+++-?++++	448173	21	8.86	7	0.2628
4	100156931	rs182789399	T	C	0.0151	0.0022	0.0151	T	-13.927	-0.171498	0.012314	4.355e-44	--?+?---?	443435	66.8	15.069	5	0.01007
4	100157089	rs149580409	T	C	0.9849	0.0021	0.0151	C	13.915	0.17135	0.012314	5.112e-44	++?-?+++?	443435	67	15.174	5	0.009645
4	100261610	rs188514326	C	G	0.0118	0.0004	0.0118	C	-9.228	-0.155165	0.0168146	2.763e-20	?-?+?---?	303318	0	2.422	4	0.6587
4	100302156	rs58143459	T	C	0.8705	0.0397	0.1295	C	5.581	0.0245792	0.00440408	2.398e-08	++++-+++?	457353	16.1	8.348	7	0.3029
4	100309767	rs72690320	A	G	0.8844	0.0345	0.1156	G	6.874	0.0321615	0.00467871	6.253e-12	++++?+++?	446828	0	3.726	6	0.7137
4	100310252	rs72690321	A	G	0.1151	0.0347	0.1151	A	-6.981	-0.0327231	0.00468745	2.936e-12	----?---?	446846	0	3.42	6	0.7546
4	100311165	rs72690323	T	C	0.1284	0.0391	0.1284	T	-5.955	-0.0263363	0.00442255	2.599e-09	----+---?	456849	32.9	10.43	7	0.1655
4	100312658	rs4076280	A	G	0.1169	0.0359	0.1169	A	-6.078	-0.0279448	0.00459769	1.215e-09	----+---+	458243	4.3	8.36	8	0.3991
4	100314182	rs185527646	A	T	0.0117	0.0003	0.0117	A	-8.866	-0.150086	0.0169282	7.603e-19	?-???---?	301788	0	2.635	3	0.4514
4	100314304	rs72690326	A	C	0.1174	0.0362	0.1174	A	-6.57	-0.0304994	0.00464222	5.018e-11	----?---+	447834	0	4.321	7	0.7421
4	100314362	rs72690327	A	G	0.1122	0.0346	0.1122	A	-6.512	-0.0304753	0.00467987	7.402e-11	----+---+	458379	0	6.741	8	0.5648
4	100315420	rs72690328	A	G	0.887	0.0341	0.113	G	6.426	0.0299777	0.00466507	1.313e-10	++++-+++-	458440	0	6.602	8	0.5801
4	100386039	rs148926542	A	G	0.9901	0.0003	0.0099	G	8.669	0.131727	0.0151952	4.36e-18	++???+++?	441847	66.7	12.017	4	0.01723
4	100411876	rs144291162	T	C	0.0106	0.0003	0.0106	T	-8.795	-0.129154	0.014685	1.435e-18	--???---?	442157	65.7	11.653	4	0.02013
4	100561867	rs192703884	T	C	0.0093	0.0003	0.0093	T	-7.912	-0.12395	0.0156661	2.523e-15	--???---?	442234	63.8	11.057	4	0.02593
4	100577893	rs142151894	C	G	0.0091	0.0003	0.0091	C	-7.925	-0.151914	0.0191689	2.282e-15	?-???---?	301809	17.6	3.639	3	0.3032
4	100625352	rs186613142	A	G	0.0083	0.0004	0.0083	A	-7.354	-0.121888	0.0165744	1.917e-13	--???---?	442247	63	10.822	4	0.02864
4	100673206	rs187466945	T	C	0.9919	0.0004	0.0081	C	7.081	0.118845	0.0167837	1.43e-12	++???+++?	441846	67.9	12.45	4	0.0143
4	100701236	rs149740532	A	G	0.9917	0.0003	0.0083	G	7.365	0.12207	0.0165744	1.777e-13	++???+++?	442249	64.1	11.138	4	0.02505
4	100722329	rs557989538	C	G	0.0083	0.0003	0.0083	C	-7.641	-0.153309	0.0200639	2.163e-14	?-???---?	301793	38.7	4.896	3	0.1796
4	100812742	rs147035170	T	G	0.9925	0.0002	0.0075	G	6.828	0.119191	0.0174562	8.581e-12	++????++?	440870	68	9.367	3	0.02479
4	100903657	rs574830013	A	G	0.0052	0.0001	0.0052	A	-6.087	-0.163288	0.0268257	1.15e-09	??????--?	268633	0	0.374	1	0.541
4	102276925	rs13135092	A	G	0.9461	0.0154	0.0539	G	5.629	0.0372481	0.00661718	1.817e-08	++++?++++	447845	35.8	10.906	7	0.1428
5	12037695	rs4702846	T	C	0.6449	0.0363	0.3551	C	5.558	0.017372	0.00312559	2.726e-08	++-+?-++-	446984	0	5.898	7	0.5517
5	12038590	rs62337990	T	C	0.3571	0.037	0.3571	T	-5.827	-0.0182121	0.00312547	5.648e-09	--+-?+--?	445898	0	4.838	6	0.5647
5	12041469	rs59324947	A	G	0.6435	0.0368	0.3565	G	5.687	0.0177615	0.00312318	1.296e-08	++-+?-++-	446887	0	4.917	7	0.6701
5	12043021	rs62337992	T	C	0.6122	0.0158	0.3878	C	5.595	0.017196	0.00307346	2.2e-08	++++?-++?	445907	0	3.738	6	0.7121
5	12045860	rs4130838	T	C	0.3563	0.0367	0.3563	T	-5.695	-0.0177894	0.00312368	1.235e-08	--+-?+--+	446856	0	5.126	7	0.6446
5	12046767	rs4348212	T	C	0.6118	0.0163	0.3882	C	5.482	0.0168276	0.00306961	4.195e-08	++++?-++-	446857	0	5.366	7	0.6154
5	12048661	rs4702847	A	G	0.3579	0.0368	0.3579	A	-5.59	-0.0174236	0.00311692	2.266e-08	--+-?+--+	447902	0	5.357	7	0.6165
5	12049873	rs56002705	A	G	0.3542	0.0356	0.3542	A	-5.641	-0.0176225	0.003124	1.69e-08	--+-?+--+	447951	0	5.725	7	0.5722
5	12050736	rs7700820	A	C	0.6456	0.0357	0.3544	C	5.597	0.0174828	0.00312361	2.175e-08	++-+?-++-	447951	0	5.724	7	0.5723
5	12054910	rs62337994	T	C	0.6424	0.0364	0.3576	C	5.552	0.017308	0.00311743	2.82e-08	++-+?-++-	447924	0	5.504	7	0.5987
5	12058817	rs62337999	A	G	0.6429	0.0366	0.3571	G	5.75	0.0179346	0.00311905	8.94e-09	++-+?-++-	447735	0	4.777	7	0.6872
5	12063108	rs10462686	T	C	0.6404	0.037	0.3596	C	5.682	0.0176896	0.00311327	1.328e-08	++-+?-++-	448019	0	4.728	7	0.6932
5	12063411	rs10462687	T	C	0.3912	0.016	0.3912	T	-5.629	-0.0172461	0.0030638	1.815e-08	----?+--?	447307	0	3.611	6	0.7291
5	12064877	rs62338003	T	C	0.3597	0.0363	0.3597	T	-5.692	-0.0177199	0.00311313	1.259e-08	--+-?+--+	448005	0	4.79	7	0.6856
5	12068340	rs62338020	T	G	0.3614	0.0375	0.3614	T	-5.791	-0.0180242	0.00311245	7.011e-09	--+-?+--+	447279	0	5.049	7	0.6539
5	12079643	rs4355525	A	C	0.39	0.0152	0.39	A	-5.627	-0.0172422	0.00306419	1.837e-08	----?+--+	447686	0	6.823	7	0.4476
5	12080851	rs10065698	A	C	0.3593	0.0363	0.3593	A	-5.875	-0.0183249	0.00311913	4.218e-09	--+-?+--?	446501	0	5.627	6	0.4662
5	12084744	rs4277917	A	C	0.4115	0.0221	0.4115	A	-5.73	-0.0174268	0.00304133	1.003e-08	----?+--?	446432	0	4.405	6	0.6221
5	12085192	rs4413531	A	G	0.5876	0.0224	0.4124	G	5.705	0.0173485	0.00304092	1.163e-08	++++?-++?	446261	0	4.118	6	0.6607
5	12086748	rs7445243	T	C	0.6087	0.0157	0.3913	C	5.684	0.0174262	0.00306583	1.319e-08	++++?-++?	446675	0	5.003	6	0.5434
5	12094920	rs10054180	A	G	0.3587	0.0363	0.3587	A	-5.8	-0.0181023	0.00312108	6.617e-09	--+-?+--?	446269	0	5.345	6	0.5004
5	12099496	rs4702848	A	T	0.5831	0.0099	0.4169	T	5.461	0.0200432	0.00367024	4.722e-08	?+-+?-++?	305377	0	2.567	5	0.7664
5	12102538	rs4602627	A	T	0.3881	0.0091	0.3881	A	-5.475	-0.0203293	0.00371312	4.382e-08	?-+-?+--?	305421	0	2.43	5	0.7871
5	12105360	rs4555799	T	C	0.6465	0.0351	0.3535	C	5.578	0.0174679	0.00313157	2.426e-08	++-+?-++?	446188	0	5.147	6	0.5251
5	12106057	rs6861988	A	G	0.3586	0.0366	0.3586	A	-5.737	-0.0179116	0.00312213	9.655e-09	--+-?+--?	446026	0	4.296	6	0.6367
5	12107197	rs56119111	T	C	0.6403	0.037	0.3597	C	5.835	0.0182081	0.0031205	5.381e-09	++-+?-++?	445890	0	4.279	6	0.6389
5	12109883	rs6875403	T	C	0.6362	0.038	0.3638	C	5.748	0.01789	0.00311239	9.043e-09	++-+?-++?	446022	0	5.164	6	0.523
5	12112423	rs6870511	T	G	0.3585	0.0364	0.3585	T	-5.455	-0.0170094	0.00311813	4.91e-08	--+-?+--+	447225	0	6.324	7	0.5025
5	12123401	rs2968107	T	C	0.6402	0.0353	0.3598	C	5.497	0.0171298	0.0031162	3.869e-08	++-+?-++-	447066	0	6.689	7	0.4619
5	12127194	rs250766	T	C	0.6405	0.0348	0.3595	C	5.489	0.0171036	0.00311599	4.046e-08	++-+?-++-	447292	0	6.807	7	0.4492
5	12136186	rs32327	A	G	0.6401	0.0353	0.3599	G	5.509	0.0171597	0.00311485	3.605e-08	++--?-++-	447401	2.2	7.154	7	0.413
5	12136353	rs32328	T	G	0.3604	0.0358	0.3604	T	-5.516	-0.0171757	0.0031138	3.475e-08	--+-?+--+	447430	0	6.84	7	0.4458
5	12138357	rs32330	T	G	0.6393	0.0355	0.3607	G	5.545	0.0172629	0.00311324	2.94e-08	++-+?-++-	447430	0	6.777	7	0.4525
5	12144372	rs1079876	T	C	0.3589	0.0357	0.3589	T	-5.514	-0.0171848	0.00311658	3.504e-08	--+-?+--+	447451	2.5	7.178	7	0.4106
5	12158351	rs250775	A	C	0.3605	0.0358	0.3605	A	-5.459	-0.0170072	0.00311544	4.798e-08	--+-?+--?	446904	0	4.673	6	0.5864
8	31151837	rs7003227	A	T	0.7765	0.0048	0.2235	T	5.486	0.0234089	0.00426703	4.109e-08	?+-+++++?	316468	0	2.383	6	0.8813
8	31151900	rs34431249	A	T	0.2245	0.0049	0.2245	A	-5.491	-0.0233914	0.00425996	4.008e-08	?-+-----?	316513	0	2.441	6	0.875
8	125469835	rs2954021	A	G	0.5442	0.0435	0.4558	G	-6.075	-0.0186745	0.00307399	1.238e-09	-?---+---	426642	35.8	10.908	7	0.1427
8	125473052	rs2954027	A	T	0.435	0.0087	0.435	A	5.663	0.020265	0.00357849	1.491e-08	?++++-+++	317734	0	3.78	7	0.8048
8	125474167	rs17321515	A	G	0.5921	0.0437	0.4079	G	-5.812	-0.0174664	0.00300524	6.182e-09	-----+---	458452	0	6.024	8	0.6445
8	125475993	rs2980868	T	C	0.4087	0.0439	0.4087	T	5.812	0.0174765	0.00300697	6.169e-09	+++++-+++	457645	0	5.605	8	0.6914
8	125476008	rs2980869	T	C	0.4087	0.0439	0.4087	T	5.808	0.0174645	0.00300697	6.322e-09	+++++-+++	457646	0	5.596	8	0.6924
9	132615400	rs10736856	T	C	0.7057	0.0095	0.2943	C	5.596	0.0190498	0.00340419	2.197e-08	+?++?-++?	415492	57.7	11.816	5	0.0374
12	110855666	rs76464604	T	G	0.0027	0.0001	0.0027	T	-6.892	-0.207658	0.0301302	5.498e-12	-?????--?	409077	0	0.221	2	0.8954
12	110906817	rs75295329	T	G	0.0021	0.0001	0.0021	T	-9.365	-0.319854	0.0341542	7.635e-21	-?????--?	409077	0	0.171	2	0.9182
12	110929440	rs12227162	T	C	0.0028	0.0001	0.0028	T	-10.268	-0.303818	0.0295888	9.774e-25	-?????--?	409077	0	0.054	2	0.9734
12	110948323	rs2188380	T	C	0.9972	0.0001	0.0028	C	10.226	0.302575	0.0295888	1.512e-24	+?????++?	409077	0	0.041	2	0.9798
12	110950497	rs193211023	T	C	0.0049	0.0002	0.0049	T	-9.641	-0.215868	0.0223906	5.37e-22	-?????--?	409077	0	0.153	2	0.9264
12	110976657	rs12229654	T	G	0.9972	0.0001	0.0028	G	10.371	0.306865	0.0295888	3.343e-25	+?????++?	409077	0	0.185	2	0.9115
12	111144803	rs76892715	T	G	0.0019	0.0001	0.0019	T	-9.184	-0.329735	0.0359032	4.173e-20	-?????--?	409077	0	0.124	2	0.94
12	111171923	rs3809297	T	G	0.0033	0.0002	0.0033	T	-10.258	-0.279654	0.027262	1.085e-24	-?????--?	409077	0	1.329	2	0.5145
12	111191585	rs11065828	A	C	0.0072	0.0003	0.0072	A	-8.596	-0.158963	0.0184927	8.231e-18	-?????--?	409077	47.5	3.813	2	0.1486
12	111280427	rs79105258	A	C	0.0048	0.0002	0.0048	A	-8.766	-0.1983	0.0226215	1.847e-18	-?????--?	409077	0	0.431	2	0.8062
12	111672685	rs3782886	T	C	0.9974	0.0002	0.0026	C	11.5	0.353081	0.0307027	1.316e-30	+?????++?	409077	0	0.197	2	0.906
12	111681367	rs11066001	T	C	0.9974	0.0002	0.0026	C	11.546	0.354493	0.0307027	7.772e-31	+?????++?	409077	0	0.181	2	0.9136
12	111702865	rs11066008	A	G	0.9923	0.0002	0.0077	G	8.239	0.147369	0.0178867	1.742e-16	+?????++?	409077	20.1	2.502	2	0.2863
12	111730205	rs11066015	A	G	0.0028	0.0002	0.0028	A	-11.725	-0.346929	0.0295888	9.443e-32	-?????--?	409077	0	0.408	2	0.8155
12	111792215	rs4646776	C	G	0.0027	0.0002	0.0027	C	-9.484	-0.352628	0.0371814	2.436e-21	??????--?	268633	0	0.313	1	0.5761
12	111803962	rs671	A	G	0.0028	0.0002	0.0028	A	-11.852	-0.350686	0.0295888	2.094e-32	-?????--?	409077	0	0.308	2	0.8572
12	111900120	rs78069066	A	G	0.003	0.0002	0.003	A	-11.877	-0.339544	0.0285884	1.55e-32	-?????--?	409077	0	0.172	2	0.9176
12	112030402	rs11066132	T	C	0.0031	0.0002	0.0031	T	-11.914	-0.33508	0.0281249	1.001e-32	-?????--?	409077	0	0.474	2	0.7892
12	112074109	rs116873087	C	G	0.0033	0.0002	0.0033	C	-9.537	-0.320843	0.0336419	1.471e-21	??????--?	268633	0	0.554	1	0.4569
12	112095970	rs78981331	T	C	0.0022	0.0002	0.0022	T	-7.907	-0.325611	0.0411801	2.632e-15	??????--?	268633	22.5	1.291	1	0.2559
12	112114470	rs147992802	T	C	0.0079	0.0002	0.0079	T	-8.27	-0.146053	0.0176606	1.343e-16	-?????--?	409077	0	1.809	2	0.4048
12	112136812	rs12231737	T	C	0.0044	0.0002	0.0044	T	-11.334	-0.267739	0.0236227	8.923e-30	-?????--?	409077	0	1.124	2	0.5702
12	112207597	rs2074356	A	G	0.0019	0.0002	0.0019	A	-10.325	-0.370701	0.0359032	5.45e-25	-?????--?	409077	0	0.859	2	0.6507
12	112298314	rs77768175	A	G	0.9966	0.0002	0.0034	G	11.135	0.29908	0.0268595	8.488e-29	+?????++?	409077	0	1.856	2	0.3953
12	112379979	rs11066280	A	T	0.0059	0.0002	0.0059	A	-7.388	-0.186126	0.025193	1.493e-13	??????--?	268633	0	0.5	1	0.4794
12	112396782	rs11537471	A	G	0.9912	0.0002	0.0088	G	7.788	0.130377	0.0167408	6.79e-15	+?????++?	409077	0	1.195	2	0.5501
12	112413478	rs11066289	T	C	0.0094	0.0003	0.0094	T	-7.479	-0.121179	0.0162026	7.499e-14	-?????--?	409077	0	0.827	2	0.6615
Note:
Chromosome: genome chromosome
Position (hg38): Physical position in build GRCh38
rsID: NCBI SNP database identifier
EA: Effect allele (this allele is where beta was calcualted)
NEA: Non-effect allele
EAF: Effect allele frequency
EAFse: Effect allele frequency standard error
MAF: Minor allelic frequency
MA: Minor allele
Zscore: zscore for the meta-analysis
Beta: Effect estimated for the allele
BetaSE: Standard error of the beta value
P-value: P-value of the meta-analysis
Direction: Direction of the effect in the different cohort (MCPS, MVP, MxGDAR, BHRC, AllofUs, BPRHS, 23andMe-female,23andMe-male,HCHS/SOL)
N: sample size for that SNP
HetISq: the estimated I2 value representing the between-study heterogeneity in the meta-analysis for each variant (as estimated by METAL)
HetChiSq: the estimated chi-squared ('Q') value representing the between-study heterogeneity in the meta-analysis for each variant (as estimated by METAL)
HetDf: the number of degrees of freedom (i.e. non-missing studies minus one) in the meta-analysis for each variant
HetPVal: the p-value for the between-study heterogeneity in the meta-analysis for each variant (as estimated by METAL)

## Sheet: ST3
Supplementary Table 3. Conditional independent variants in the sample weigthed fixed-effects meta-analysis
Chr	SNP	bp	Gene	refA	freq	b	se	p	n	freq_geno	bJ	bJ_se	pJ	LD_r
2	rs1260326	27730940	GCKR	T	0.3518	-0.0245104	0.00313232	5.07657e-15	446913	0.361671	-0.0245104	0.00313253	5.09789e-15	0
3	rs2167046	85586806	CADM2	A	0.6112	-0.0220141	0.00306517	6.86989e-13	447883	0.586455	-0.0220141	0.00306535	6.8903e-13	0
3	rs73137382	89461363	EPHA3	C	0.7963	-0.0278475	0.00473437	4.05338e-09	275026	0.817003	-0.0278475	0.00473466	4.06219e-09	0
4	rs11940694	39414993	KLB	A	0.5626	-0.023877	0.00308968	1.09249e-14	425671	0.564841	-0.023877	0.00308989	1.09708e-14	0
4	rs184703805	99438019	TSPAN5	A	0.0041	-0.222477	0.0285593	6.70092e-15	300220	0.00576369	-0.379246	0.0423734	3.55147e-19	-0.00822221
4	rs60478839	99893345		A	0.013	-0.107359	0.017033	2.91939e-10	268608	0.00288184	-0.104398	0.0170775	9.76808e-10	-0.0254131
4	rs1229984	100239319	ADH1B	T	0.0659	-0.183528	0.0060268	1.12705e-203	446343	0.0576369	-0.21484	0.00669383	5.13026e-226	-0.0762931
4	rs1789896	100256984		A	0.6221	-0.0249283	0.00319963	6.64809e-15	415453	0.685879	-0.0322361	0.00323193	1.9758e-23	-0.0147328
4	rs148926542	101307196		A	0.9901	0.131727	0.0151952	4.35932e-18	441795	0.988473	0.10492	0.01707	7.92405e-10	-0.0115967
5	rs10065698	12080963		A	0.3593	-0.0183249	0.00311913	4.22843e-09	446480	0.354467	-0.0183249	0.00311924	4.23407e-09	0
8	rs34431249	31009416	WRN	A	0.2245	-0.0233914	0.00425996	3.99664e-08	316492	0.17147	-0.0233914	0.00426015	4.00237e-08	0
8	rs2954021	126482077	TRIB1AL	A	0.5442	-0.0186745	0.00307399	1.23988e-09	426620	0.462536	-0.0186745	0.00307411	1.24185e-09	0
9	rs10736856	135490787	DDX31	T	0.7057	0.0190498	0.00340419	2.19354e-08	415472	0.707493	0.0190498	0.00340431	2.19612e-08	0
12	rs11066132	112468206	NAA25	T	0.0031	-0.33508	0.0281249	1.00059e-32	409013	0.00288184	-0.433407	0.0311501	5.24393e-44	0
Note: in bold you will find the independent novel variant
Chr: Chromosome number
SNP: NCBI SNP database identifier
bp: Physical position of the SNP in build GRCh37
Gene: The gene in which the SNP is located
refA: The effect allele
freq: Thefrequency of the effect allele in the original data
b: Beta coefficient of the meta-analysis
se: Standard error of the beta coefficient
p: P value of the meta-analysis
n: Estimated effective sample size of the meta-analysis
freq_geno: The frequency of the effect allele in the reference data
bJ: Beta coefficient for the joint effect
bJ_se: Standard error of the joint effect
pJ: P value for the joint effect.
LD_r: Linkage disequilibrium (LD) between the SNP i and SNP i + 1 for the SNPs on the list

## Sheet: ST4
Supplementary Table 4. Potential causal variants identifed using statistical fine-mapping with susieR
SNP	Chr	Pos	Gene	A1	A2	freq	b	se	p	N	PIP	CS
rs2950835	2	27527678		A	G	0.4031	-0.0170958	0.00304902	2.062e-08	447060	1	1
rs2911711	2	27527679		T	A	0.388	-0.0255062	0.00934979	0.006373	48174	1	2
rs11940694	4	39413373	KLB	G	A	0.4374	0.023877	0.00308968	1.096e-14	425692	0.937773	1
rs184703805	4	98516868	TSPAN5	A	G	0.0041	-0.222477	0.0285593	6.727e-15	300265	1	6
rs72906741	4	99504254		G	T	0.0668	-0.0540024	0.0062136	3.606e-18	415492	0.999853	4
rs145058060	4	96536401	LINC02267	T	C	0.0068	-0.011712	0.0182999	0.5219	442135	1	3
rs62325499	4	99188707	LOC100507053	T	C	0.0086	-0.166065	0.016292	2.121e-24	441877	1	7
rs1229984	4	99318162	ADH1B	T	C	0.0659	-0.183528	0.0060268	1.12e-203	447247	1	1
rs34206317	4	97701512	STPG2	G	C	0.0393	-0.0547715	0.00992956	3.472e-08	268633	0.989505	8
rs283417	4	99371543		T	A	0.0464	-0.0323387	0.00900297	0.0003287	278833	1	5
rs183876036	4	99372971		T	C	0.0014	0.0261347	0.0418155	0.5319	409077	1	10
rs57742750	4	99414797	ADH7	G	A	0.004	4.94432e-05	0.0247216	0.9984	410703	1	9
rs75824767	12	111758654		T	C	0.0012	0.11278	0.0742463	0.1288	151353	1	2
rs2074356	12	112207597	HECTD4	A	G	0.0019	-0.370701	0.0359032	5.45e-25	409077	1	1
Note: in bold you will find the independent variant that also was prioritized as causal
SNP: NCBI SNP database identifier
Chr: Chromosome number
Pos: Physical position of the SNP in build GRCh38
Gene: The gene in which the SNP is located
A1: Effect allele (this allele is where beta was calcualted)
A2: Non-effect allele
freq: The frequency of the effect allele
b: Beta coefficient of the meta-analysis
se: Standard error of the beta coefficient
p: P value of the meta-analysis
N: Sample size included in the meta-analysis for the genetic variant
PIP: posterior inclusion probability
CS: number of credible set where the variant was included

## Sheet: ST5
Supplementary Table 5. Association of the ADH locus in the Metabolic Syndrome Cohort in Mexico
SNP	REF	ALT	EA	Beta	SE	T value	P value	MAF
rs111741780	G	A	A	0.527954	0.188433	2.80182	0.00510095	0.0652303
rs191677672	T	C	C	0.527954	0.188433	2.80182	0.00510095	0.0652303
rs111466094	C	T	T	0.593172	0.21181	2.80049	0.0051219	0.0504052
rs111501847	G	T	T	0.593172	0.21181	2.80049	0.0051219	0.0504052
rs111569429	T	C	C	0.593172	0.21181	2.80049	0.0051219	0.0504052
rs113445331	T	A	A	0.593172	0.21181	2.80049	0.0051219	0.0504052
rs143722705	A	G	G	0.593172	0.21181	2.80049	0.0051219	0.0504052
rs146748718	C	T	T	0.593172	0.21181	2.80049	0.0051219	0.0504052
rs149476309	G	A	A	0.593172	0.21181	2.80049	0.0051219	0.0504052
rs150052475	A	C	C	0.593172	0.21181	2.80049	0.0051219	0.0504052
rs150918939	G	T	T	0.593172	0.21181	2.80049	0.0051219	0.0504052
rs181163639	A	C	C	0.593172	0.21181	2.80049	0.0051219	0.0504052
rs184626578	A	G	G	0.593172	0.21181	2.80049	0.0051219	0.0504052
rs188895182	A	G	G	0.593172	0.21181	2.80049	0.0051219	0.0504052
rs189292015	G	C	C	0.593172	0.21181	2.80049	0.0051219	0.0504052
rs190653003	G	A	A	0.593172	0.21181	2.80049	0.0051219	0.0504052
rs115337753	A	C	C	0.524705	0.187906	2.79237	0.00525199	0.0656256
rs116245649	C	T	T	0.524705	0.187906	2.79237	0.00525199	0.0656256
rs1969097	A	C	C	0.524705	0.187906	2.79237	0.00525199	0.0656256
rs112551978	A	G	G	0.520838	0.188178	2.7678	0.00566419	0.065428
rs116040762	A	G	G	0.520285	0.188159	2.76513	0.00571062	0.065428
rs145234718	T	C	C	0.583189	0.21141	2.75856	0.00582652	0.0506029
rs114719272	A	G	G	0.517087	0.187635	2.75582	0.00587561	0.0658233
Note: the phenotype analyzed in this cohort was drinks per week
SNP: NCBI SNP database identifier
REF: Reference allele
ALT: Alternative allele
EA: Effect allele (allele for what the beta was estimated
Beta: effect size of the association of drinks per week and the genetic variant
SE: standard error of the effect
tvalue: T value of the regression
pvalue: p value of the regression
MAF: minor allelic frequency in The Metabolic Syndrome Cohort

## Sheet: ST6
Supplementary Table 6. Genome-wide significant variants in the MTAG meta-analysis
rsID	CHR	POS	EA	NEA	EAF	BETA	SE	Z	P
rs1260326	2	27508073	C	T	0.646778	0.0172443	0.00226589	7.6104	2.7324e-14
rs6547692	2	27512105	A	G	0.565233	0.0158734	0.00218537	7.26349	3.7722e-13
rs780095	2	27518238	G	A	0.599514	0.0157219	0.00220972	7.11487	1.12022e-12
rs780094	2	27518370	C	T	0.647354	0.0168472	0.0022657	7.43577	1.03962e-13
rs780093	2	27519736	C	T	0.650225	0.016639	0.00226999	7.32996	2.30214e-13
rs1260334	2	27525730	A	C	0.559156	0.0153184	0.00218046	7.0253	2.13601e-12
rs1260333	2	27525757	G	A	0.595332	0.0155234	0.00220557	7.03825	1.94669e-12
rs1313566	2	27526037	A	G	0.559132	0.0154027	0.00218038	7.06423	1.61509e-12
rs6753534	2	27530004	T	C	0.559678	0.0143755	0.00218215	6.58777	4.4649e-11
rs28732378	3	85354742	G	A	0.693073	-0.0146019	0.00235014	-6.21322	5.19102e-10
rs62253107	3	85354880	G	T	0.626693	-0.0141134	0.00224044	-6.29942	2.98764e-10
rs2117152	3	85355633	T	G	0.562885	-0.0126337	0.00218485	-5.78238	7.36508e-09
rs2163972	3	85355810	A	G	0.339872	0.0129839	0.00228651	5.67851	1.35874e-08
rs12498010	3	85357217	T	C	0.295575	0.0151842	0.00237241	6.40033	1.55037e-10
rs4856269	3	85357585	G	A	0.617747	-0.0130448	0.00222952	-5.85094	4.88793e-09
rs11705775	3	85357788	T	G	0.339973	0.0129287	0.00228536	5.65717	1.53889e-08
rs9814516	3	85358830	T	G	0.295545	0.0151525	0.00237248	6.3868	1.69395e-10
rs9824178	3	85360163	A	G	0.578132	-0.0141651	0.00219368	-6.45724	1.06626e-10
rs9861451	3	85360203	G	A	0.66333	-0.0149345	0.00229249	-6.51455	7.29078e-11
rs11917490	3	85360320	A	G	0.577458	-0.0139568	0.00219335	-6.36323	1.97553e-10
rs13076632	3	85360734	T	C	0.2907	0.0152274	0.00238426	6.38664	1.69576e-10
rs12714625	3	85361862	A	G	0.33993	0.0129828	0.00228535	5.68089	1.33993e-08
rs9990096	3	85362043	T	G	0.561898	-0.013167	0.00218356	-6.03008	1.63882e-09
rs1368748	3	85363180	G	A	0.58105	-0.0126108	0.00219594	-5.74279	9.3128e-09
rs13094105	3	85363387	G	A	0.427319	0.0123979	0.00218827	5.66563	1.46489e-08
rs12494242	3	85364030	C	T	0.428612	0.0126158	0.00218751	5.76719	8.06032e-09
rs9866089	3	85364845	C	T	0.413074	0.0144751	0.0021986	6.58378	4.58643e-11
rs7627971	3	85365141	C	T	0.66269	-0.0148256	0.00229143	-6.47002	9.79904e-11
rs11127887	3	85365706	A	G	0.290632	0.0152279	0.00238443	6.38639	1.69848e-10
rs9865191	3	85373437	T	C	0.294064	0.0156219	0.00237628	6.57409	4.89525e-11
rs6776114	3	85377690	A	G	0.577189	-0.0143848	0.00219371	-6.55728	5.47963e-11
rs1433711	3	85379813	T	C	0.291549	0.0154772	0.00238344	6.49366	8.37774e-11
rs13085170	3	85380022	A	C	0.292031	0.0153462	0.00238249	6.44124	1.185e-10
rs9819830	3	85380987	C	T	0.412887	0.0143571	0.00220078	6.52363	6.86252e-11
rs11921010	3	85385110	C	T	0.557617	-0.0140298	0.0021824	-6.42864	1.2875e-10
rs9879025	3	85386975	T	C	0.297183	0.0151967	0.00237017	6.41167	1.43935e-10
rs1821349	3	85389414	G	A	0.412527	0.0143221	0.00220109	6.50686	7.67393e-11
rs1368743	3	85389559	G	A	0.412526	0.0142964	0.00220109	6.49514	8.29537e-11
rs10511087	3	85389986	G	A	0.566516	-0.0146021	0.00218649	-6.67834	2.41672e-11
rs1368742	3	85393058	G	A	0.562608	-0.014592	0.00218409	-6.68106	2.37213e-11
rs9309977	3	85393559	T	C	0.289285	0.0155025	0.00238985	6.4868	8.76781e-11
rs1991872	3	85394643	A	G	0.57455	-0.0149195	0.00219184	-6.80683	9.97707e-12
rs12637798	3	85397626	G	A	0.587061	-0.0148367	0.00219941	-6.74577	1.52215e-11
rs9863620	3	85399343	C	T	0.393339	0.0148092	0.00221773	6.67764	2.42829e-11
rs71626887	3	85400627	T	G	0.268902	0.0163687	0.0024435	6.69888	2.10027e-11
rs7650834	3	85402654	A	C	0.269409	0.0163061	0.00244187	6.67771	2.42699e-11
rs12638482	3	85405665	T	C	0.574398	-0.0149099	0.00219001	-6.80815	9.88618e-12
rs62250685	3	85408090	G	A	0.581876	-0.014952	0.00219532	-6.81086	9.70174e-12
rs2117151	3	85409533	A	C	0.269323	0.0163199	0.00244206	6.68283	2.34372e-11
rs1030721	3	85409711	C	T	0.393373	0.0147731	0.00221765	6.66162	2.70829e-11
rs1549979	3	85410981	T	C	0.575332	-0.0149331	0.00219016	-6.81827	9.21456e-12
rs9880919	3	85412152	A	G	0.264496	0.0158285	0.00245633	6.44396	1.16399e-10
rs4856569	3	85414975	G	A	0.586495	-0.0149691	0.00219845	-6.80894	9.83199e-12
rs6549024	3	85417302	C	T	0.393709	0.0147677	0.00221741	6.65987	2.7407e-11
rs2053108	3	85418822	A	C	0.563538	-0.0143055	0.00218432	-6.54917	5.78565e-11
rs6808400	3	85418909	C	T	0.618344	-0.0146035	0.00222998	-6.54872	5.80327e-11
rs12493461	3	85419769	G	A	0.393479	0.0147745	0.00221764	6.66227	2.6963e-11
rs60311538	3	85421537	G	T	0.581909	-0.0149964	0.00219506	-6.8319	8.3796e-12
rs10433498	3	85422668	A	G	0.269231	0.0164067	0.00244256	6.71703	1.85471e-11
rs7636243	3	85422883	T	C	0.563547	-0.0142545	0.00218433	-6.52579	6.7643e-11
rs7650284	3	85423077	C	T	0.618296	-0.0145747	0.00222993	-6.53595	6.32054e-11
rs7638953	3	85423312	A	G	0.563485	-0.0142777	0.00218429	-6.53652	6.29685e-11
rs6772991	3	85424167	G	A	0.393587	0.0147557	0.00221753	6.65413	2.8498e-11
rs35894540	3	85426497	C	T	0.586317	-0.0149605	0.00219854	-6.80473	1.01238e-11
rs13081230	3	85426944	A	G	0.26912	0.0163763	0.00244275	6.70405	2.02719e-11
rs6808159	3	85427748	T	C	0.269083	0.0163327	0.00244285	6.68593	2.29459e-11
rs2326309	3	85427867	G	T	0.618217	-0.0145339	0.00222984	-6.5179	7.12976e-11
rs1025533	3	85431034	T	C	0.269143	0.016327	0.00244268	6.68406	2.32414e-11
rs1865250	3	85432262	C	T	0.581509	-0.0150252	0.00219553	-6.84351	7.72781e-12
rs1433708	3	85432829	C	T	0.61822	-0.0146696	0.00223063	-6.57645	4.81807e-11
rs9860769	3	85433137	T	C	0.563586	-0.0143882	0.00218513	-6.58458	4.56171e-11
rs7609594	3	85433445	A	G	0.563546	-0.0144007	0.0021851	-6.59042	4.38592e-11
rs35827242	3	85433511	A	G	0.57367	-0.0149633	0.0021905	-6.83101	8.4318e-12
rs13092627	3	85435960	T	C	0.268992	0.0164544	0.0024432	6.73478	1.64181e-11
rs2217720	3	85436080	T	G	0.563595	-0.0143991	0.00218513	-6.58958	4.4106e-11
rs9863488	3	85438315	A	G	0.563592	-0.014636	0.00218514	-6.69797	2.1134e-11
rs11929525	3	85438332	C	T	0.581967	-0.0152351	0.00219587	-6.93806	3.97513e-12
rs12629036	3	85439149	C	T	0.585507	-0.0149595	0.00219867	-6.80386	1.01849e-11
rs1821351	3	85439175	T	C	0.562747	-0.0143288	0.00218465	-6.55886	5.42222e-11
rs12637461	3	85439203	T	G	0.573621	-0.0149086	0.00219015	-6.8071	9.95845e-12
rs9868427	3	85439312	T	C	0.269131	0.0164153	0.0024428	6.71988	1.81875e-11
rs9813512	3	85439496	G	T	0.393611	0.0149326	0.00221758	6.73374	1.6536e-11
rs1865252	3	85439590	G	A	0.617973	-0.0147301	0.00223042	-6.60418	3.99721e-11
rs1865251	3	85439919	C	A	0.585589	-0.015015	0.00219873	-6.82894	8.55418e-12
rs9874740	3	85440756	A	G	0.269211	0.01649	0.00244257	6.75107	1.46759e-11
rs2082556	3	85441797	A	G	0.574361	-0.0150481	0.00219052	-6.86965	6.43582e-12
rs7627044	3	85444075	A	G	0.574062	-0.014967	0.00219044	-6.83287	8.32332e-12
rs9821041	3	85445117	T	C	0.269001	0.0165571	0.00244317	6.7769	1.22783e-11
rs4856572	3	85445269	C	T	0.585629	-0.015034	0.00219877	-6.83745	8.0613e-12
rs11127890	3	85447481	T	C	0.26922	0.0163871	0.00244254	6.70902	1.95937e-11
rs2033526	3	85447608	C	A	0.583709	-0.0148853	0.0021973	-6.77433	1.24986e-11
rs11922956	3	85448657	G	A	0.616617	-0.0157199	0.0022287	-7.05338	1.74627e-12
rs993137	3	85449885	T	C	0.574345	-0.0149591	0.00219063	-6.82866	8.57102e-12
rs993136	3	85450183	C	T	0.611178	-0.0151608	0.00222283	-6.8205	9.0726e-12
rs6762695	3	85451239	G	A	0.611156	-0.0151732	0.00222281	-6.82613	8.72352e-12
rs1433715	3	85452579	A	C	0.553484	-0.0147246	0.00218107	-6.75111	1.46719e-11
rs9835441	3	85452933	A	G	0.268592	0.0163225	0.00244444	6.67738	2.43255e-11
rs993716	3	85453441	T	C	0.557179	-0.0148148	0.0021815	-6.79112	1.11269e-11
rs2117153	3	85455302	A	G	0.557534	-0.0149028	0.00218168	-6.83088	8.43971e-12
rs1433714	3	85455799	G	T	0.610335	-0.0153317	0.0022218	-6.90059	5.17887e-12
rs9309980	3	85456724	G	A	0.393143	0.014821	0.00221813	6.68178	2.36058e-11
rs9309982	3	85458081	C	T	0.393159	0.0147206	0.00221799	6.6369	3.20349e-11
rs57630146	3	85459277	A	G	0.557329	-0.0148829	0.00218153	-6.82222	8.9646e-12
rs1368740	3	85459349	G	A	0.39506	0.0145712	0.0022164	6.57426	4.88958e-11
rs1368739	3	85459432	C	T	0.39302	0.0147174	0.00221813	6.63506	3.2436e-11
rs4856573	3	85459803	A	G	0.557516	-0.01494	0.00218163	-6.8481	7.48393e-12
rs12633762	3	85460841	C	T	0.393217	0.0146673	0.00221794	6.613	3.766e-11
rs11127891	3	85461033	C	T	0.393242	0.0146752	0.00221792	6.61668	3.67357e-11
rs9838811	3	85463674	A	C	0.269244	0.0161496	0.00244243	6.61212	3.7885e-11
rs6774985	3	85463850	C	T	0.609689	-0.0152786	0.00222114	-6.87869	6.04042e-12
rs6762267	3	85463965	A	C	0.574069	-0.0151043	0.00219042	-6.89562	5.36298e-12
rs62250712	3	85464566	T	C	0.574039	-0.0150481	0.00219051	-6.8697	6.43392e-12
rs62250713	3	85464643	G	A	0.593089	-0.0149912	0.00220582	-6.79621	1.07411e-11
rs62250714	3	85466626	A	G	0.558182	-0.0148135	0.00218192	-6.78923	1.12737e-11
rs62250715	3	85466846	A	G	0.558146	-0.0148221	0.00218186	-6.79336	1.09552e-11
rs1368750	3	85470261	C	T	0.593644	-0.015123	0.00220595	-6.85552	7.10541e-12
rs1155666	3	85471867	C	T	0.593942	-0.0151387	0.00220621	-6.86186	6.79716e-12
rs2069123	3	85473644	G	T	0.593715	-0.01514	0.00220601	-6.86307	6.73972e-12
rs1542248	3	85478184	A	G	0.576392	-0.0150579	0.00219265	-6.86746	6.53573e-12
rs7614148	3	85480478	A	G	0.576348	-0.0150238	0.00219263	-6.85195	7.2849e-12
rs62250719	3	85482700	T	G	0.577758	-0.0150394	0.00219435	-6.85367	7.19804e-12
rs10511085	3	85482737	A	C	0.57792	-0.0150503	0.00219447	-6.8583	6.96839e-12
rs17515196	3	85482969	A	G	0.576341	-0.0150786	0.00219263	-6.87696	6.11439e-12
rs57872438	3	85486706	A	G	0.576567	-0.0151138	0.00219284	-6.89232	5.48902e-12
rs55897272	3	85489834	A	G	0.575951	-0.0150269	0.00219189	-6.85569	7.09713e-12
rs11127895	3	85490660	G	T	0.594124	-0.0151188	0.00220586	-6.85392	7.1851e-12
rs11127896	3	85490666	T	C	0.576985	-0.0150777	0.00219257	-6.87672	6.12473e-12
rs1551043	3	85495060	T	G	0.576662	-0.015122	0.00219229	-6.89782	5.28055e-12
rs10433500	3	85497648	A	G	0.579791	-0.0151036	0.00219508	-6.88066	5.95752e-12
rs7618429	3	85499870	G	A	0.593746	-0.01523	0.00220548	-6.90555	5.00091e-12
rs62250750	3	85501819	C	T	0.593741	-0.0152349	0.00220547	-6.90776	4.92366e-12
rs1449391	3	85505432	T	G	0.576556	-0.0152404	0.0021914	-6.95467	3.534e-12
rs62250754	3	85508421	T	G	0.576431	-0.015185	0.0021913	-6.92968	4.21804e-12
rs6804845	3	85514696	C	A	0.593961	-0.0153062	0.00220483	-6.94213	3.86226e-12
rs62250758	3	85515713	T	G	0.576727	-0.0152321	0.00219152	-6.95045	3.64114e-12
rs1375560	3	85516578	T	G	0.576551	-0.0151689	0.00219145	-6.92184	4.458e-12
rs17515586	3	85520022	G	A	0.59394	-0.0152427	0.00220481	-6.91336	4.73292e-12
rs10511083	3	85521809	G	A	0.593919	-0.0152499	0.00220479	-6.91673	4.6219e-12
rs62252461	3	85521899	A	G	0.353535	-0.0125627	0.00226504	-5.54634	2.91719e-08
rs6764988	3	85522103	C	A	0.594254	-0.01528	0.00220512	-6.92932	4.2288e-12
rs1868532	3	85522733	T	C	0.576594	-0.0152309	0.00219141	-6.95025	3.64638e-12
rs1449393	3	85523399	T	C	0.576582	-0.015235	0.00219141	-6.95216	3.59739e-12
rs1449394	3	85523762	T	C	0.576574	-0.0151789	0.0021914	-6.9266	4.31089e-12
rs4856579	3	85523936	C	T	0.593992	-0.0152761	0.00220485	-6.92841	4.25605e-12
rs58828944	3	85524922	C	T	0.594198	-0.0152262	0.00220467	-6.90635	4.9727e-12
rs62252462	3	85525270	A	G	0.576251	-0.0151179	0.00219083	-6.90057	5.17958e-12
rs62252463	3	85525409	A	G	0.576324	-0.0151495	0.00219088	-6.91482	4.68457e-12
rs62252464	3	85525544	G	A	0.593485	-0.0151773	0.00220407	-6.88606	5.73597e-12
rs62252465	3	85525549	T	C	0.575392	-0.0150797	0.00219024	-6.88493	5.78142e-12
rs62252466	3	85525592	G	A	0.593874	-0.0150533	0.0022044	-6.82873	8.56677e-12
rs1470635	3	85526215	T	C	0.576263	-0.0151062	0.00219084	-6.89519	5.37918e-12
rs1470636	3	85526291	C	A	0.594176	-0.0152189	0.00220465	-6.90309	5.0882e-12
rs7427346	3	85526369	C	T	0.59418	-0.0152203	0.00220465	-6.9037	5.06658e-12
rs35738543	3	85526540	G	T	0.59411	-0.0152241	0.00220459	-6.90562	4.99838e-12
rs17456263	3	85526573	A	C	0.576315	-0.0151324	0.00219086	-6.90707	4.9478e-12
rs35701422	3	85526625	C	T	0.59425	-0.0152093	0.00220471	-6.89854	5.25401e-12
rs59967234	3	85526694	G	A	0.594134	-0.015193	0.00220462	-6.89145	5.52282e-12
rs59225869	3	85526836	G	A	0.594296	-0.0151524	0.00220476	-6.87261	6.30396e-12
rs60427790	3	85526941	C	T	0.594413	-0.0151619	0.00220486	-6.87659	6.13038e-12
rs56778912	3	85526954	T	C	0.576625	-0.015075	0.00219107	-6.88018	5.97762e-12
rs66505109	3	85527308	C	A	0.594177	-0.0151969	0.00220465	-6.89312	5.45814e-12
rs7628237	3	85527498	G	A	0.594104	-0.0151934	0.00220459	-6.89172	5.51225e-12
rs56777875	3	85527856	A	G	0.576387	-0.0151275	0.00219091	-6.90468	5.03181e-12
rs4856581	3	85528016	A	G	0.576413	-0.0151243	0.00219093	-6.90316	5.08583e-12
rs4856583	3	85528119	G	A	0.59423	-0.0152357	0.00220472	-6.9105	4.82957e-12
rs1449389	3	85528387	G	A	0.593753	-0.0152186	0.00220429	-6.90409	5.05265e-12
rs1449390	3	85528553	A	G	0.576237	-0.0150567	0.00219081	-6.87267	6.30119e-12
rs55939743	3	85528927	A	G	0.576184	-0.0150868	0.00219077	-6.88653	5.71681e-12
rs62252495	3	85528979	A	G	0.575719	-0.0151351	0.00219045	-6.90955	4.86205e-12
rs62252496	3	85529030	A	G	0.576095	-0.0151739	0.00219071	-6.92649	4.314e-12
rs62252497	3	85529313	T	C	0.576353	-0.0151183	0.00219089	-6.90052	5.18137e-12
rs56187922	3	85529575	A	C	0.576336	-0.0151159	0.00219088	-6.89946	5.22004e-12
rs62252499	3	85530456	G	A	0.593704	-0.0152271	0.00220426	-6.90803	4.91434e-12
rs62252500	3	85530460	T	C	0.57631	-0.0151518	0.00219086	-6.91594	4.64786e-12
rs62252501	3	85530488	G	A	0.594609	-0.0152307	0.00220507	-6.90714	4.94536e-12
rs17516256	3	85531438	A	G	0.576466	-0.0151677	0.00219124	-6.922	4.45319e-12
rs11923525	3	85531949	A	G	0.577338	-0.014907	0.00219189	-6.801	1.03895e-11
rs77657121	3	85532081	A	G	0.576483	-0.0150886	0.00219095	-6.88682	5.70542e-12
rs17516284	3	85532236	A	G	0.576641	-0.0150055	0.00219105	-6.84854	7.46067e-12
rs62252505	3	85532629	T	C	0.575351	-0.0150176	0.00219041	-6.85609	7.07715e-12
rs113351222	3	85532841	C	A	0.593051	-0.015147	0.00220366	-6.87359	6.26081e-12
rs62252506	3	85532876	C	T	0.593044	-0.015159	0.00220365	-6.87905	6.02539e-12
rs62252507	3	85532928	T	C	0.576221	-0.0150949	0.00219077	-6.89024	5.56991e-12
rs62252509	3	85533095	T	C	0.576186	-0.0150466	0.00219074	-6.86828	6.49812e-12
rs17456763	3	85533493	T	C	0.57632	-0.014989	0.00219085	-6.84165	7.82864e-12
rs17516346	3	85533530	G	A	0.592938	-0.015093	0.00220356	-6.84937	7.41753e-12
rs67018424	3	85533563	A	G	0.575943	-0.0150349	0.00219058	-6.86347	6.72099e-12
rs10511076	3	85534043	G	A	0.59342	-0.0150782	0.00220397	-6.84139	7.84309e-12
rs10511075	3	85534253	A	G	0.576401	-0.0150649	0.00219091	-6.87607	6.15261e-12
rs58919842	3	85534321	A	G	0.576343	-0.0150715	0.00219085	-6.87929	6.01504e-12
rs59770976	3	85534392	G	A	0.593319	-0.0151764	0.00220389	-6.88618	5.73103e-12
rs56779213	3	85534595	G	A	0.593371	-0.0151593	0.00220393	-6.87831	6.05653e-12
rs17516504	3	85534795	C	T	0.592746	-0.01511	0.0022034	-6.85757	7.00407e-12
rs17516546	3	85535875	G	A	0.590155	-0.0148835	0.00220196	-6.7592	1.38751e-11
rs73130364	3	85535885	C	T	0.590139	-0.0148954	0.00220195	-6.76463	1.33652e-11
rs73130366	3	85535886	A	G	0.575465	-0.0148111	0.00219097	-6.76005	1.37947e-11
rs66625173	3	85535941	G	A	0.592816	-0.0151814	0.00220346	-6.88981	5.58674e-12
rs17457050	3	85536127	T	C	0.576299	-0.0151551	0.00219082	-6.91755	4.59529e-12
rs17516683	3	85536281	A	G	0.576384	-0.0150705	0.00219088	-6.87874	6.03863e-12
rs66781790	3	85536496	G	A	0.593226	-0.0151221	0.00220381	-6.86179	6.80022e-12
rs17457189	3	85536710	A	G	0.576406	-0.0150656	0.00219089	-6.87646	6.13571e-12
rs9713905	3	85537598	A	G	0.35992	-0.0125344	0.00225618	-5.55557	2.7671e-08
rs2167046	3	85537656	A	G	0.575474	-0.0155237	0.00219118	-7.08464	1.3941e-12
rs2122235	3	85537771	T	C	0.575606	-0.0149997	0.00219035	-6.84808	7.48456e-12
rs62252513	3	85538387	T	C	0.576405	-0.0150744	0.00219089	-6.8805	5.96434e-12
rs17516857	3	85538560	C	A	0.593409	-0.0151637	0.00220396	-6.88021	5.97625e-12
rs34467301	3	85538920	C	T	0.593367	-0.0151315	0.00220393	-6.86568	6.61762e-12
rs35438712	3	85539055	C	T	0.593437	-0.0151116	0.00220386	-6.8569	7.03712e-12
rs17457377	3	85539225	G	T	0.592692	-0.0152166	0.00220323	-6.90653	4.96669e-12
rs62252516	3	85539344	T	C	0.576302	-0.0150414	0.00219069	-6.86603	6.60116e-12
rs17457426	3	85539812	C	A	0.592952	-0.0151434	0.00220345	-6.87261	6.30394e-12
rs17457454	3	85539860	C	T	0.592334	-0.0151992	0.00220292	-6.89956	5.21651e-12
rs6766493	3	85540125	A	G	0.575997	-0.0150495	0.00219049	-6.87037	6.40354e-12
rs6779501	3	85540430	C	T	0.593458	-0.0151233	0.00220388	-6.86212	6.78474e-12
rs4856271	3	85540747	G	A	0.593364	-0.0150954	0.0022038	-6.84971	7.40004e-12
rs62253961	3	85541121	T	C	0.576325	-0.0149903	0.00219082	-6.84234	7.79079e-12
rs17517121	3	85541958	A	G	0.576308	-0.0149952	0.0021907	-6.84496	7.64989e-12
rs17517142	3	85542079	C	A	0.593469	-0.015121	0.00220389	-6.86107	6.83452e-12
rs17457642	3	85542213	T	C	0.576367	-0.0150372	0.00219074	-6.864	6.69582e-12
rs17457669	3	85542301	C	T	0.593631	-0.0151269	0.00220403	-6.86331	6.72807e-12
rs1900918	3	85543192	A	C	0.575905	-0.014976	0.00219041	-6.83706	8.08355e-12
rs2326317	3	85543348	G	A	0.594448	-0.0150116	0.00220531	-6.80703	9.96325e-12
rs6777456	3	85543833	T	G	0.57564	-0.0150483	0.00219024	-6.87061	6.39288e-12
rs6777458	3	85543838	A	G	0.575638	-0.015045	0.00219024	-6.86914	6.45919e-12
rs17517273	3	85543996	C	A	0.593291	-0.0151024	0.00220373	-6.8531	7.22681e-12
rs6780346	3	85544434	T	C	0.574785	-0.0149483	0.00218986	-6.82616	8.72194e-12
rs6804626	3	85544523	G	A	0.59353	-0.0149182	0.00220397	-6.76881	1.29846e-11
rs11127899	3	85545412	G	A	0.593394	-0.015133	0.00220382	-6.8667	6.57024e-12
rs11127900	3	85545449	G	A	0.593582	-0.0151061	0.00220398	-6.85402	7.18032e-12
rs10865610	3	85545545	G	A	0.608121	-0.0145722	0.00221755	-6.57128	4.98848e-11
rs1551045	3	85545696	C	A	0.593592	-0.0151677	0.00220399	-6.88196	5.90342e-12
rs1463204	3	85545983	C	T	0.593555	-0.0151149	0.00220395	-6.85809	6.97858e-12
rs1551047	3	85546707	T	G	0.576503	-0.015022	0.00219083	-6.85676	7.04375e-12
rs1551048	3	85546795	T	G	0.576864	-0.0149574	0.00219108	-6.82653	8.69934e-12
rs6765881	3	85547069	G	A	0.593401	-0.0150968	0.00220386	-6.85018	7.37548e-12
rs6765991	3	85547173	G	A	0.593484	-0.0151423	0.00220393	-6.87059	6.39386e-12
rs1463205	3	85547282	A	G	0.57626	-0.0149892	0.0021907	-6.8422	7.79882e-12
rs4502590	3	85547329	T	C	0.57628	-0.0149942	0.00219071	-6.84443	7.67825e-12
rs1463207	3	85547554	T	C	0.576187	-0.0149577	0.00219068	-6.82789	8.61747e-12
rs1463208	3	85547562	A	C	0.576439	-0.0150338	0.00219086	-6.86207	6.78696e-12
rs4603966	3	85547705	C	T	0.593394	-0.0150981	0.00220385	-6.85076	7.34586e-12
rs62253964	3	85547859	T	C	0.577155	-0.0149747	0.00219131	-6.83366	8.2776e-12
rs62253965	3	85547864	A	G	0.577096	-0.0149167	0.00219136	-6.80707	9.96039e-12
rs2875908	3	85548543	C	T	0.592502	-0.0151242	0.0022031	-6.86498	6.64987e-12
rs4856273	3	85549110	A	G	0.577063	-0.0151605	0.00219125	-6.91867	4.55908e-12
rs6792295	3	85549331	C	T	0.59342	-0.0151253	0.00220388	-6.86304	6.74099e-12
rs7637527	3	85549931	C	T	0.593408	-0.0151098	0.00220386	-6.85606	7.07849e-12
rs62253966	3	85550175	A	G	0.575671	-0.0149925	0.0021903	-6.84496	7.6498e-12
rs4301022	3	85550241	T	G	0.574284	-0.0149693	0.00218937	-6.83725	8.07256e-12
rs17458504	3	85550561	A	G	0.575737	-0.0151472	0.00219102	-6.91332	4.73447e-12
rs62253969	3	85550642	A	G	0.576279	-0.0151795	0.00219071	-6.92904	4.2371e-12
rs17518082	3	85550675	T	C	0.57653	-0.0151422	0.00219088	-6.91146	4.79676e-12
rs17458574	3	85550718	G	T	0.59326	-0.0152372	0.00220374	-6.91426	4.70307e-12
rs6783137	3	85550768	T	C	0.57627	-0.0151802	0.00219069	-6.92942	4.22566e-12
rs17458609	3	85550827	T	C	0.575632	-0.0151734	0.00219027	-6.92763	4.27947e-12
rs1449405	3	85550927	C	T	0.593372	-0.0152487	0.00220383	-6.91918	4.54281e-12
rs1449406	3	85551062	C	A	0.59373	-0.0152239	0.00220426	-6.9066	4.96391e-12
rs1449407	3	85551234	G	A	0.593189	-0.0152478	0.00220368	-6.91926	4.53994e-12
rs6549036	3	85551440	T	G	0.576255	-0.0151518	0.00219069	-6.91644	4.6314e-12
rs6549037	3	85551558	A	G	0.576124	-0.0151086	0.0021906	-6.897	5.31104e-12
rs62253971	3	85551644	G	A	0.59309	-0.015167	0.0022036	-6.8828	5.8686e-12
rs2029131	3	85553324	C	A	0.592643	-0.0152127	0.00220327	-6.90457	5.03541e-12
rs2029132	3	85553596	A	C	0.576209	-0.0151394	0.0021907	-6.91074	4.8212e-12
rs2029133	3	85553658	A	G	0.576287	-0.0152059	0.00219075	-6.94096	3.89454e-12
rs62250463	3	85554722	G	T	0.593241	-0.015226	0.00220376	-6.90912	4.87681e-12
rs1375544	3	85555008	G	A	0.59322	-0.0152076	0.00220375	-6.90079	5.1714e-12
rs1375545	3	85555170	T	G	0.57621	-0.0151361	0.0021907	-6.90924	4.87268e-12
rs1375546	3	85555255	A	G	0.576435	-0.0151736	0.00219085	-6.92589	4.33256e-12
rs72615726	3	85555615	A	G	0.576075	-0.015121	0.00219061	-6.90266	5.10368e-12
rs17518584	3	85555773	T	C	0.575921	-0.0152074	0.00219067	-6.94191	3.86838e-12
rs66631011	3	85555896	A	G	0.576831	-0.0150656	0.00219185	-6.87346	6.26638e-12
rs68049270	3	85555911	T	C	0.576705	-0.015038	0.00219177	-6.86113	6.83178e-12
rs73133799	3	85556030	C	T	0.593168	-0.0151155	0.00220393	-6.85843	6.96231e-12
rs73133800	3	85556033	T	C	0.576234	-0.0150502	0.00219095	-6.86927	6.45317e-12
rs67568006	3	85556056	T	G	0.576158	-0.0150456	0.0021909	-6.86731	6.54233e-12
rs62250465	3	85556287	T	C	0.575866	-0.0150509	0.00219047	-6.87109	6.37117e-12
rs6549039	3	85556853	G	A	0.593207	-0.0152751	0.00220373	-6.93145	4.1654e-12
rs6549040	3	85556911	T	G	0.576114	-0.0151766	0.00219064	-6.92794	4.2701e-12
rs4856275	3	85557370	A	C	0.577033	-0.0154538	0.0021949	-7.04077	1.91186e-12
rs4856586	3	85557371	G	T	0.594544	-0.0155595	0.00220853	-7.04516	1.85255e-12
rs4856587	3	85557546	T	G	0.575746	-0.0151579	0.00219062	-6.91945	4.53393e-12
rs4856277	3	85557597	G	A	0.592524	-0.0152206	0.00220316	-6.90854	4.89674e-12
rs67277278	3	85557812	A	C	0.57556	-0.0151066	0.00219041	-6.89671	5.32217e-12
rs4543024	3	85557853	C	T	0.592543	-0.0152025	0.00220332	-6.8998	5.20747e-12
rs68028504	3	85557860	G	A	0.59255	-0.0152041	0.00220333	-6.9005	5.1819e-12
rs4441668	3	85557992	G	A	0.592677	-0.0152327	0.00220335	-6.91343	4.7308e-12
rs1449370	3	85558011	T	C	0.575596	-0.015131	0.00219035	-6.90802	4.91479e-12
rs66499081	3	85558135	G	A	0.592566	-0.0151723	0.00220335	-6.88603	5.73696e-12
rs1449371	3	85558173	C	T	0.592353	-0.0151319	0.00220316	-6.86827	6.49849e-12
rs66544515	3	85558243	A	G	0.575529	-0.0151153	0.00219031	-6.90098	5.16439e-12
rs7653790	3	85558455	T	G	0.575816	-0.0151727	0.0021905	-6.92659	4.31105e-12
rs724304	3	85558989	C	A	0.593278	-0.0153537	0.00220387	-6.96668	3.24508e-12
rs1449372	3	85559049	G	T	0.593199	-0.0153175	0.00220379	-6.95053	3.63917e-12
rs1449373	3	85559311	A	G	0.575904	-0.015222	0.00219056	-6.94889	3.68181e-12
rs1449374	3	85559337	T	C	0.575853	-0.015233	0.00219053	-6.95405	3.54951e-12
rs1449375	3	85559418	T	G	0.575836	-0.0151573	0.00219051	-6.91951	4.5322e-12
rs2167043	3	85559922	C	T	0.592325	-0.0153334	0.00220307	-6.96003	3.40199e-12
rs2167044	3	85559945	T	C	0.575256	-0.0152417	0.00219014	-6.95925	3.421e-12
rs59073108	3	85560139	G	A	0.593565	-0.0151943	0.00220412	-6.89359	5.4401e-12
rs62250467	3	85560153	C	T	0.59358	-0.0151916	0.00220413	-6.89231	5.48933e-12
rs17459563	3	85560215	A	G	0.574366	-0.0151278	0.00218954	-6.90913	4.87619e-12
rs77852438	3	85560262	T	C	0.57583	-0.0151541	0.00219053	-6.91801	4.58021e-12
rs78288623	3	85560263	A	C	0.57583	-0.0151541	0.00219053	-6.91802	4.57988e-12
rs1449378	3	85560645	T	C	0.575982	-0.0151942	0.00219061	-6.93604	4.03246e-12
rs1449379	3	85560729	C	T	0.593064	-0.0152627	0.00220368	-6.92602	4.32858e-12
rs1530738	3	85560933	G	A	0.593132	-0.0152385	0.00220374	-6.91486	4.68314e-12
rs1530740	3	85561337	A	G	0.576039	-0.0152047	0.00219065	-6.94074	3.9005e-12
rs17519241	3	85561499	T	C	0.575398	-0.0151301	0.00219022	-6.90802	4.91467e-12
rs62250468	3	85561545	T	C	0.575286	-0.0151187	0.00219014	-6.90308	5.08853e-12
rs17519262	3	85561575	G	A	0.592383	-0.0151876	0.0022031	-6.89373	5.43482e-12
rs78015688	3	85561757	G	T	0.593104	-0.0152157	0.00220372	-6.90454	5.0368e-12
rs2167045	3	85561826	A	G	0.575745	-0.015122	0.00219045	-6.9036	5.07026e-12
rs2122233	3	85561918	A	G	0.575993	-0.0151284	0.00219062	-6.90599	4.98545e-12
rs2122234	3	85561989	A	G	0.575979	-0.0151161	0.00219061	-6.90041	5.18511e-12
rs4856588	3	85562270	A	G	0.575893	-0.0150856	0.00219055	-6.88666	5.71161e-12
rs4856589	3	85562410	G	A	0.593032	-0.0152071	0.00220365	-6.90085	5.16923e-12
rs1900914	3	85562641	A	G	0.57597	-0.0150988	0.00219061	-6.89253	5.48089e-12
rs1449380	3	85562753	T	C	0.575981	-0.0151175	0.00219061	-6.90104	5.1623e-12
rs1449381	3	85562892	G	A	0.593117	-0.0151926	0.00220372	-6.89405	5.42257e-12
rs1449382	3	85562903	A	G	0.576038	-0.0151003	0.00219065	-6.89307	5.45993e-12
rs4856590	3	85563378	A	G	0.570432	-0.0147382	0.00218712	-6.73864	1.59877e-11
rs17459906	3	85563550	C	T	0.59267	-0.0152429	0.00220341	-6.91786	4.58517e-12
rs4856592	3	85563580	A	G	0.575189	-0.015166	0.00219014	-6.92465	4.37044e-12
rs62250472	3	85563598	A	C	0.575287	-0.015141	0.00219021	-6.91304	4.74391e-12
rs4856593	3	85563617	C	T	0.592254	-0.0151878	0.00220306	-6.89397	5.42566e-12
rs1375549	3	85564228	C	T	0.592596	-0.015208	0.00220353	-6.90165	5.14036e-12
rs1375550	3	85564230	G	A	0.592596	-0.0152087	0.00220353	-6.90194	5.12971e-12
rs1375551	3	85564351	C	T	0.592623	-0.0151563	0.00220337	-6.87871	6.0396e-12
rs1449383	3	85564681	G	A	0.592986	-0.0151511	0.00220361	-6.87556	6.1749e-12
rs1449385	3	85564841	C	T	0.593099	-0.0152048	0.00220371	-6.89964	5.21357e-12
rs62250489	3	85565596	A	C	0.575912	-0.0151214	0.00219057	-6.90296	5.09306e-12
rs62250490	3	85565784	T	C	0.575934	-0.0151228	0.00219058	-6.90354	5.07238e-12
rs7617306	3	85566033	T	C	0.575935	-0.0150873	0.00219061	-6.88726	5.68772e-12
rs7629091	3	85566148	G	T	0.593191	-0.0151675	0.00220381	-6.88238	5.88591e-12
rs62250491	3	85566859	T	G	0.576098	-0.0150692	0.00219131	-6.87682	6.12042e-12
rs62250492	3	85566864	C	T	0.593451	-0.0151612	0.00220463	-6.87698	6.11355e-12
rs17519948	3	85566968	C	A	0.593706	-0.0152683	0.00220427	-6.92671	4.30744e-12
rs1597315	3	85567659	T	C	0.575032	-0.0151103	0.00219001	-6.89964	5.21355e-12
rs17460541	3	85568962	T	G	0.575673	-0.0150924	0.00219044	-6.8901	5.57549e-12
rs1375555	3	85569158	C	T	0.593605	-0.0152629	0.00220418	-6.92452	4.37443e-12
rs1375554	3	85569269	G	A	0.593605	-0.0152507	0.00220418	-6.91897	4.54938e-12
rs59211082	3	85570494	C	T	0.593678	-0.0152419	0.00220424	-6.91478	4.68586e-12
rs61316596	3	85570707	T	C	0.575995	-0.0151162	0.00219066	-6.90031	5.18908e-12
rs59417256	3	85571331	G	T	0.593634	-0.0152208	0.00220421	-6.90533	5.00882e-12
rs62250496	3	85571471	T	G	0.575864	-0.0151351	0.00219057	-6.9092	4.87411e-12
rs57276248	3	85571860	G	A	0.593561	-0.0152407	0.00220414	-6.91458	4.69265e-12
rs59835020	3	85572055	G	A	0.593562	-0.0152377	0.00220414	-6.91321	4.73791e-12
rs7616458	3	85572781	C	T	0.593603	-0.0152312	0.00220418	-6.91016	4.84109e-12
rs17460701	3	85574121	T	C	0.575923	-0.0151446	0.00219061	-6.9134	4.7318e-12
rs6790699	3	85575039	G	A	0.593795	-0.015182	0.00220436	-6.88728	5.68685e-12
rs4856596	3	85575236	T	G	0.575866	-0.0149936	0.00219057	-6.84462	7.66802e-12
rs6766690	3	85575411	T	C	0.575735	-0.0150517	0.00219049	-6.8714	6.35742e-12
rs67904150	3	85576081	G	A	0.59352	-0.0151454	0.00220411	-6.87146	6.35473e-12
rs7617356	3	85576904	T	C	0.575775	-0.0150436	0.00219053	-6.86758	6.53012e-12
rs62250500	3	85578541	T	C	0.575793	-0.0149747	0.00219053	-6.83612	8.13653e-12
rs6762535	3	85579538	A	G	0.576269	-0.0151873	0.00219248	-6.92699	4.29888e-12
rs6762733	3	85579715	A	G	0.576295	-0.0151949	0.0021925	-6.93038	4.19715e-12
rs6549042	3	85580105	G	A	0.593089	-0.0152736	0.00220538	-6.92561	4.34094e-12
rs6549044	3	85583282	G	A	0.59307	-0.0152323	0.00220537	-6.9069	4.95354e-12
rs62250502	3	85585175	G	A	0.590881	-0.0151013	0.00220439	-6.85053	7.35765e-12
rs1375557	3	85585976	T	G	0.576227	-0.0151028	0.00219245	-6.88856	5.63617e-12
rs1375558	3	85586040	G	A	0.593021	-0.0152021	0.00220533	-6.89336	5.44913e-12
rs7634761	3	85587271	A	G	0.576252	-0.0151589	0.00219247	-6.91404	4.71029e-12
rs4508796	3	85587478	G	A	0.593078	-0.0152306	0.00220537	-6.90615	4.97983e-12
rs68001049	3	85591268	G	A	0.59337	-0.0151607	0.00220576	-6.87322	6.27673e-12
rs11919099	3	85592675	T	G	0.576428	-0.0151068	0.00219272	-6.88954	5.59749e-12
rs1375565	3	85593731	G	A	0.593305	-0.0151646	0.0022057	-6.87518	6.19097e-12
rs62250540	3	85595907	T	C	0.576357	-0.015033	0.00219267	-6.85601	7.08099e-12
rs62263910	3	85598464	T	G	0.576527	-0.0150452	0.00219266	-6.86162	6.8083e-12
rs62263912	3	85599096	A	G	0.576383	-0.0150289	0.00219256	-6.85448	7.1572e-12
rs956281	3	85600048	G	T	0.593331	-0.0151249	0.00220559	-6.85751	7.00713e-12
rs34495106	3	85601986	G	A	0.594227	-0.0150855	0.00220656	-6.83663	8.10772e-12
rs9812845	3	85607072	C	A	0.397001	0.013407	0.00221575	6.05079	1.44133e-09
rs12635683	3	85607939	A	G	0.215827	0.0159355	0.00263521	6.04715	1.47426e-09
rs11127903	3	85613775	T	G	0.21578	0.015806	0.00263542	5.99752	2.00357e-09
rs9880010	3	85617467	T	C	0.215762	0.0159017	0.0026355	6.03367	1.60273e-09
rs1449396	3	85618436	A	G	0.215883	0.0159852	0.00263496	6.06657	1.30673e-09
rs1449395	3	85618533	A	C	0.210774	0.0160856	0.00265792	6.05197	1.43088e-09
rs9836967	3	85623785	A	C	0.215877	0.0161038	0.00263498	6.11155	9.86668e-10
rs7643091	3	85625222	A	G	0.252354	0.0154114	0.00249625	6.17381	6.66654e-10
rs13082188	3	85625508	C	T	0.390542	0.0136192	0.00222207	6.12907	8.8395e-10
rs35326689	3	85628687	G	A	0.389819	0.0136452	0.00222308	6.13797	8.35848e-10
rs62310771	4	39369476	T	C	0.553142	-0.0120127	0.00217928	-5.51224	3.54286e-08
rs62310772	4	39373709	T	C	0.552979	-0.012181	0.00217883	-5.59065	2.26227e-08
rs6531714	4	39376838	T	C	0.553338	-0.0121422	0.00217905	-5.57223	2.51493e-08
rs6857705	4	39397005	C	T	0.452152	0.0137311	0.00217599	6.31026	2.7857e-10
rs12643682	4	39397784	C	T	0.452443	0.0139683	0.00217635	6.41823	1.37871e-10
rs13110790	4	39399378	A	G	0.466171	0.0139223	0.00217057	6.41411	1.41646e-10
rs7661596	4	39400905	T	C	0.459349	0.0141077	0.00217387	6.48969	8.60111e-11
rs7686103	4	39401125	G	A	0.444685	0.0142646	0.0021801	6.5431	6.02557e-11
rs33968162	4	39402111	T	C	0.465566	0.0137918	0.00217039	6.35451	2.09087e-10
rs2381379	4	39402686	T	C	0.459326	0.0140742	0.00217388	6.47425	9.52838e-11
rs67152983	4	39402955	A	G	0.459128	0.01415	0.00217395	6.50888	7.57111e-11
rs13129401	4	39403252	G	A	0.444788	0.0142182	0.00218	6.52209	6.93345e-11
rs13135439	4	39403531	G	T	0.445968	0.0144481	0.00217948	6.62915	3.37624e-11
rs13146907	4	39423628	G	A	0.504926	-0.0135969	0.0021663	-6.27654	3.46196e-10
rs139475172	4	96065141	G	A	0.258265	-0.0165021	0.002475	-6.66754	2.60129e-11
rs114556496	4	96066520	G	A	0.258888	-0.0173454	0.00247291	-7.01417	2.31322e-12
rs113705826	4	96073111	A	C	0.0166381	-0.0549163	0.00847342	-6.48101	9.11094e-11
rs191543804	4	96171112	G	A	0.259475	-0.0165152	0.0024704	-6.68525	2.30535e-11
rs78895189	4	96181737	A	G	0.0142597	-0.0600924	0.00913379	-6.57913	4.73216e-11
rs141584796	4	96190165	A	G	0.0144236	-0.059249	0.00908251	-6.52342	6.87241e-11
rs114444478	4	96228591	A	C	0.0141312	-0.0596655	0.0091752	-6.50291	7.87807e-11
rs17025247	4	96246536	T	C	0.0216698	-0.040694	0.00744354	-5.46702	4.57665e-08
rs114537171	4	96257639	G	A	0.259886	-0.0162304	0.00246953	-6.57225	4.95608e-11
rs189185784	4	96266492	A	G	0.0066614	-0.0907558	0.0133125	-6.81732	9.27548e-12
rs149005016	4	96270309	A	G	0.00665499	-0.0905287	0.0133189	-6.79701	1.06815e-11
rs116683839	4	96297486	T	C	0.0130549	-0.0579912	0.00954202	-6.07746	1.22102e-09
rs149222890	4	96297619	C	T	0.259976	-0.0160186	0.00246945	-6.48672	8.77253e-11
rs143148614	4	96326794	A	G	0.00785686	-0.0828525	0.0122679	-6.75362	1.44196e-11
rs17025385	4	96328531	G	T	0.263844	-0.0151457	0.00245955	-6.15793	7.37037e-10
rs17025434	4	96360881	G	A	0.264067	-0.0150928	0.00245948	-6.13659	8.43129e-10
rs138138908	4	96401257	A	C	0.007397	-0.0851131	0.012639	-6.73418	1.6486e-11
rs138088321	4	96483127	C	A	0.259576	-0.0162055	0.00247096	-6.55838	5.43941e-11
rs148887968	4	96525461	C	T	0.256229	-0.016126	0.00248164	-6.49815	8.13141e-11
rs181004160	4	96575968	A	G	0.00500506	-0.106774	0.0153491	-6.95637	3.49156e-12
rs193132902	4	96709408	G	A	0.256092	-0.0233215	0.00248106	-9.39981	5.46594e-21
rs184125963	4	96771967	C	T	0.255748	-0.0226034	0.00248277	-9.1041	8.69857e-20
rs140637557	4	96842917	A	G	0.0131183	-0.0823021	0.00951833	-8.64669	5.30135e-18
rs184508640	4	96929682	C	T	0.256355	-0.0228284	0.00248021	-9.20424	3.44102e-20
rs141022549	4	96968793	G	A	0.256801	-0.0231781	0.00247879	-9.35058	8.71699e-21
rs7685670	4	96970343	A	G	0.0369322	-0.035081	0.00574806	-6.1031	1.04034e-09
rs140572477	4	97027672	A	G	0.00883672	-0.112266	0.0115727	-9.70097	2.98649e-22
rs143385959	4	97097223	A	G	0.0273384	-0.0419486	0.00664775	-6.31019	2.78688e-10
rs147071310	4	97130086	A	C	0.00878642	-0.113431	0.0116066	-9.77293	1.47139e-22
rs143475242	4	97452667	T	C	0.00962375	-0.107224	0.011094	-9.66501	4.24585e-22
rs138283763	4	97473588	T	C	0.00900417	-0.116049	0.0114666	-10.1206	4.47751e-24
rs145329623	4	97607558	G	A	0.257628	-0.0249473	0.00247671	-10.0728	7.29004e-24
rs148357035	4	97673484	C	T	0.257352	-0.0248389	0.00247759	-10.0254	1.17845e-23
rs142038534	4	98039391	C	T	0.257361	-0.0245033	0.00247755	-9.89016	4.59295e-23
rs138081390	4	98107958	C	T	0.257776	-0.0247223	0.00247621	-9.98394	1.79212e-23
rs149127347	4	98179856	G	T	0.257679	-0.0251297	0.00247654	-10.1471	3.41377e-24
rs140184756	4	98240201	G	A	0.25736	-0.0253325	0.00247753	-10.2249	1.53428e-24
rs437282	4	98325886	G	A	0.279997	-0.0142858	0.00241333	-5.91956	3.22814e-09
rs378123	4	98331026	A	G	0.0630447	-0.0266783	0.00445858	-5.98357	2.18293e-09
rs148037510	4	98346006	G	A	0.256937	-0.025369	0.00247878	-10.2345	1.38948e-24
rs10028330	4	98347798	T	C	0.713384	0.0131632	0.00239398	5.49847	3.83096e-08
rs141300829	4	98379287	C	A	0.256942	-0.0252969	0.00247869	-10.2058	1.86867e-24
rs143092959	4	98543945	G	A	0.257968	-0.0298957	0.00247566	-12.0759	1.41675e-33
rs1919208	4	98646075	T	C	0.740727	0.0231896	0.00247219	9.38017	6.58636e-21
rs114026228	4	98646767	C	T	0.264057	-0.0423335	0.00245978	-17.2103	2.22453e-66
rs4699663	4	98651572	T	G	0.740863	0.0261588	0.00247233	10.5806	3.66534e-26
rs193099203	4	98708866	T	C	0.018904	-0.136922	0.00796226	-17.1963	2.82932e-66
rs62325470	4	98723015	T	C	0.0101466	-0.101765	0.0108063	-9.4172	4.63295e-21
rs2178126	4	98765343	G	A	0.267092	-0.0151172	0.00244972	-6.17101	6.78544e-10
rs2866027	4	98780863	T	C	0.0274092	-0.0420713	0.00663755	-6.33837	2.32204e-10
rs2141284	4	98783016	A	G	0.00885271	-0.121763	0.0115614	-10.5319	6.15836e-26
rs144198753	4	98792199	T	C	0.0200298	-0.149912	0.00773995	-19.3686	1.41999e-83
rs145441283	4	98830643	G	A	0.266957	-0.0468902	0.00245136	-19.1283	1.46835e-81
rs17216080	4	99038781	C	T	0.336664	-0.0141204	0.00229085	-6.16381	7.10138e-10
rs29001570	4	99073254	C	T	0.25795	-0.0312849	0.0024761	-12.6348	1.35813e-36
rs551676206	4	99097938	C	A	0.269644	-0.0516313	0.00244186	-21.1443	3.11568e-99
rs11722615	4	99116515	A	G	0.0284615	-0.067164	0.00651798	-10.3044	6.73014e-25
rs188040771	4	99145921	A	G	0.00380291	-0.0959593	0.0175903	-5.45525	4.89044e-08
rs116203444	4	99146962	C	T	0.273933	-0.0491473	0.00243081	-20.2185	6.73233e-91
rs62325497	4	99172538	A	G	0.0286811	-0.0579076	0.00649582	-8.9146	4.89599e-19
rs62325499	4	99188707	T	C	0.00594991	-0.140712	0.0140872	-9.98863	1.70927e-23
rs11733695	4	99201759	A	G	0.0119879	-0.130449	0.00995143	-13.1085	2.94231e-39
rs1154431	4	99234313	G	A	0.269178	-0.0240017	0.002444	-9.82066	9.17414e-23
rs1229984	4	99318162	C	T	0.941695	0.138218	0.00462046	29.9144	1.27919e-196
rs1229982	4	99322775	G	T	0.766829	0.0218001	0.00256279	8.50642	1.79382e-17
rs1693439	4	99324332	G	A	0.948311	0.0301804	0.00489625	6.164	7.09318e-10
rs1693435	4	99325554	T	G	0.186156	0.0189803	0.0027857	6.81346	9.52776e-12
rs71612681	4	99325959	A	C	0.126742	0.01819	0.0032588	5.58182	2.38017e-08
rs2213041	4	99326194	A	C	0.181932	0.0237588	0.00280742	8.46287	2.60883e-17
rs78346552	4	99326452	G	A	0.325609	0.0181394	0.00231128	7.84818	4.22108e-15
rs1789889	4	99326708	A	G	0.181924	0.0235822	0.00280746	8.39984	4.47095e-17
rs71612682	4	99327749	T	C	0.128656	0.0193682	0.00323728	5.98286	2.19259e-09
rs138495951	4	99328569	A	G	0.0249391	-0.154922	0.00694318	-22.3128	2.7762e-110
rs1789890	4	99328727	A	G	0.182695	0.0237557	0.00280149	8.47965	2.25864e-17
rs1789891	4	99329262	A	C	0.183437	0.0236714	0.00279706	8.46296	2.60679e-17
rs1789892	4	99329501	A	G	0.296271	0.0269453	0.00237376	11.3513	7.30352e-30
rs36070167	4	99329704	T	C	0.128649	0.0192709	0.00323722	5.9529	2.63428e-09
rs1154432	4	99332491	A	G	0.182598	0.0237454	0.00280205	8.47431	2.36483e-17
rs1154433	4	99332551	G	A	0.451444	0.0248738	0.00217807	11.4201	3.31744e-30
rs1154430	4	99333413	A	G	0.182658	0.0239662	0.00280169	8.55417	1.18725e-17
rs3846448	4	99333778	A	G	0.128719	0.0192702	0.00323641	5.95418	2.61376e-09
rs1229979	4	99334796	T	C	0.184105	0.0183801	0.00279634	6.5729	4.93452e-11
rs1229978	4	99335042	C	T	0.450048	0.0243341	0.00217844	11.1704	5.69164e-29
rs1662031	4	99335636	G	A	0.410719	0.0246568	0.00220054	11.2049	3.85819e-29
rs2298753	4	99336750	C	T	0.324836	0.0181163	0.00231157	7.83724	4.60546e-15
rs1612735	4	99336850	C	T	0.410682	0.024655	0.00220057	11.2039	3.90163e-29
rs1789898	4	99337179	C	A	0.410683	0.024642	0.00220057	11.198	4.16902e-29
rs1662033	4	99337224	G	T	0.336033	0.0152503	0.00229191	6.65398	2.85265e-11
rs1693454	4	99337454	C	T	0.336027	0.0152497	0.00229192	6.65366	2.8589e-11
rs3910713	4	99337491	G	T	0.324129	0.0181617	0.00231288	7.85242	4.08092e-15
rs1442479	4	99337518	C	T	0.409809	0.0247068	0.00220142	11.2232	3.13875e-29
rs1442480	4	99337524	C	A	0.409811	0.0246941	0.00220141	11.2174	3.3511e-29
rs1442481	4	99337890	G	A	0.410641	0.0246028	0.0022006	11.1801	5.10605e-29
rs1693456	4	99338194	A	G	0.331952	0.0256535	0.00229891	11.159	6.47264e-29
rs1789901	4	99338212	C	T	0.334648	0.0152231	0.00229426	6.63531	3.2382e-11
rs1662060	4	99338684	C	T	0.41055	0.0246382	0.00220068	11.1958	4.27756e-29
rs1789902	4	99339014	T	C	0.333555	0.0256697	0.00229608	11.1798	5.11938e-29
rs1693476	4	99339117	C	T	0.410639	0.0246055	0.00220055	11.1815	5.02269e-29
rs1662059	4	99339221	C	A	0.410649	0.0246218	0.00220055	11.189	4.61868e-29
rs62307295	4	99339388	A	C	0.117845	0.0263483	0.0033575	7.84759	4.2412e-15
rs698	4	99339632	C	T	0.41034	0.0245521	0.00220072	11.1564	6.66563e-29
rs3114047	4	99339963	G	A	0.953889	0.0377539	0.0051616	7.31438	2.58577e-13
rs3114048	4	99340059	A	G	0.333579	0.0256554	0.00229604	11.1737	5.48184e-29
rs35189763	4	99340095	A	C	0.117847	0.0263522	0.00335748	7.84881	4.20009e-15
rs1693471	4	99340795	A	G	0.333546	0.0256414	0.0022961	11.1674	5.88943e-29
rs141973904	4	99341085	T	C	0.0249544	-0.155212	0.00694115	-22.3611	9.41348e-111
rs1789904	4	99341251	A	G	0.215384	0.0173024	0.0026334	6.57036	5.01945e-11
rs1662058	4	99341602	C	T	0.410686	0.0245571	0.00220052	11.1597	6.4208e-29
rs1693477	4	99341905	T	C	0.333848	0.0256139	0.00229567	11.1575	6.5839e-29
rs904093	4	99342090	C	T	0.410195	0.0246851	0.00220117	11.2145	3.46133e-29
rs904094	4	99342095	G	A	0.410227	0.024728	0.00220115	11.2341	2.7723e-29
rs904095	4	99342226	G	A	0.408677	0.0244789	0.00220214	11.1159	1.04946e-28
rs1662057	4	99342257	C	T	0.408664	0.0245398	0.00220221	11.1433	7.7239e-29
rs904096	4	99342427	G	T	0.410654	0.0246183	0.00220057	11.1872	4.70989e-29
rs1789910	4	99342558	G	A	0.410507	0.0245694	0.00220064	11.1647	6.07276e-29
rs1789911	4	99342621	C	T	0.41025	0.0246075	0.00220084	11.1809	5.05478e-29
rs1693481	4	99342677	T	C	0.333523	0.0257227	0.00229615	11.2025	3.96246e-29
rs1789912	4	99342785	T	C	0.333233	0.0256039	0.00229664	11.1484	7.28896e-29
rs1693482	4	99342808	T	C	0.333214	0.0256182	0.00229656	11.155	6.7664e-29
rs1693483	4	99343789	C	T	0.410611	0.0245908	0.00220055	11.1748	5.41438e-29
rs1625439	4	99344168	A	C	0.333398	0.0257382	0.00229632	11.2084	3.70689e-29
rs1789913	4	99344191	G	A	0.410437	0.0246754	0.00220069	11.2126	3.53818e-29
rs62307297	4	99344358	A	G	0.333532	0.025626	0.00229609	11.1607	6.3476e-29
rs1789914	4	99344446	T	G	0.333029	0.0256914	0.002297	11.1847	4.84341e-29
rs1662056	4	99344465	C	A	0.363131	0.0149489	0.00225445	6.63083	3.33814e-11
rs1693425	4	99344955	T	C	0.333539	0.0256476	0.00229608	11.1702	5.70732e-29
rs1693426	4	99345173	G	A	0.410511	0.0246612	0.00220063	11.2064	3.79227e-29
rs1789915	4	99345214	G	A	0.335968	0.0150874	0.00229193	6.58285	4.6152e-11
rs1662053	4	99345426	C	A	0.410644	0.0246406	0.00220066	11.1969	4.22101e-29
rs1662052	4	99345478	G	A	0.410579	0.0246807	0.00220071	11.2149	3.44765e-29
rs1789916	4	99345539	A	G	0.333419	0.0257892	0.00229643	11.2301	2.90032e-29
rs1693427	4	99345670	C	T	0.410603	0.0246296	0.00220069	11.1918	4.47464e-29
rs62307318	4	99345866	A	G	0.117739	0.0266122	0.00335896	7.92276	2.32292e-15
rs6532815	4	99345999	G	A	0.443153	-0.0228762	0.0021821	-10.4836	1.02806e-25
rs1789917	4	99346007	A	G	0.333278	0.0257505	0.00229667	11.2121	3.55622e-29
rs1662051	4	99346082	A	C	0.333343	0.0256802	0.00229656	11.182	4.99393e-29
rs1693430	4	99346511	T	C	0.33343	0.0257211	0.00229641	11.2006	4.05117e-29
rs283412	4	99346515	G	A	0.974398	0.0693771	0.00686444	10.1067	5.15757e-24
rs1789919	4	99346562	G	A	0.409798	0.0246776	0.00220135	11.2102	3.63383e-29
rs1693431	4	99346892	G	T	0.410527	0.0246479	0.00220075	11.1997	4.08978e-29
rs33988198	4	99346975	C	A	0.324628	0.0183124	0.00231206	7.92037	2.36811e-15
rs283413	4	99347033	C	A	0.988484	0.129008	0.0101459	12.7153	4.8651e-37
rs34178057	4	99347445	C	A	0.324605	0.0183149	0.0023121	7.92133	2.34991e-15
rs1789920	4	99347699	C	A	0.335866	0.0151479	0.00229222	6.60842	3.88451e-11
rs17526590	4	99347888	A	G	0.11769	0.026636	0.00335957	7.92839	2.22001e-15
rs1789921	4	99348045	A	G	0.215065	0.0173912	0.00263492	6.60028	4.10377e-11
rs13125415	4	99349295	G	A	0.401594	0.0241117	0.00221209	10.8999	1.1533e-27
rs1629270	4	99350149	G	A	0.410276	0.0247095	0.00220097	11.2266	3.01751e-29
rs1789923	4	99350453	T	C	0.215507	0.0174007	0.00263287	6.60903	3.86859e-11
rs1662049	4	99350692	T	C	0.334692	0.0246293	0.00229426	10.7352	6.95845e-27
rs1662048	4	99350875	C	T	0.411473	0.0237146	0.00220021	10.7783	4.35742e-27
rs1662045	4	99350909	A	G	0.21622	0.0160241	0.00262973	6.09344	1.10507e-09
rs17586023	4	99351793	G	A	0.3246	0.018314	0.00231201	7.92125	2.35138e-15
rs34761493	4	99352013	A	G	0.283009	-0.0250347	0.00240521	-10.4085	2.26673e-25
rs1789924	4	99353129	T	C	0.334836	0.0245859	0.00229378	10.7185	8.33169e-27
rs17586163	4	99353414	C	T	0.324671	0.0183438	0.00231198	7.93425	2.11772e-15
rs11499823	4	99353592	G	A	0.324574	0.0182443	0.00231206	7.89093	2.99947e-15
rs1629838	4	99353739	A	G	0.334682	0.0245997	0.00229412	10.7229	7.94458e-27
rs1789925	4	99354588	C	T	0.411246	0.0235798	0.00220003	10.7179	8.38426e-27
rs1693469	4	99354745	A	G	0.334575	0.0246141	0.0022943	10.7284	7.49016e-27
rs283407	4	99355412	C	T	0.975664	0.0621764	0.00703514	8.83798	9.74686e-19
rs78744403	4	99355614	A	G	0.116859	0.0261876	0.00337055	7.76954	7.87706e-15
rs172222	4	99355702	G	A	0.975874	0.0624047	0.00706592	8.83178	1.03019e-18
rs11499826	4	99355779	A	G	0.333824	0.0243574	0.00229628	10.6073	2.75493e-26
rs2453980	4	99356280	T	C	0.334828	0.0243622	0.0022949	10.6158	2.51606e-26
rs11499828	4	99356401	C	T	0.325383	0.0179324	0.00231112	7.75922	8.54567e-15
rs1662037	4	99357662	A	G	0.216796	0.015907	0.00262717	6.05479	1.40598e-09
rs980972	4	99358090	A	C	0.333852	0.0243929	0.00229619	10.6232	2.3239e-26
rs1614377	4	99358175	A	G	0.215155	0.0157434	0.00263443	5.97603	2.28646e-09
rs62307321	4	99358301	C	T	0.325784	0.0180518	0.00231038	7.81334	5.56916e-15
rs1693470	4	99358332	A	G	0.333812	0.0244037	0.00229626	10.6276	2.21805e-26
rs1662039	4	99358527	A	G	0.333555	0.0243739	0.0022967	10.6126	2.60423e-26
rs2851300	4	99358667	T	C	0.3336	0.0243803	0.00229662	10.6157	2.51835e-26
rs78234152	4	99358732	A	G	0.118026	0.0263406	0.00335606	7.84868	4.20455e-15
rs1662021	4	99358950	C	T	0.410142	0.0232268	0.00220155	10.5502	5.06837e-26
rs1662020	4	99358953	C	T	0.410161	0.0232121	0.00220154	10.5436	5.4374e-26
rs1229862	4	99359085	T	G	0.214855	0.0157706	0.00263574	5.98338	2.18561e-09
rs62307322	4	99359643	A	G	0.118823	0.0261679	0.0033463	7.81996	5.28396e-15
rs113909752	4	99359910	T	C	0.281851	-0.0252365	0.00240697	-10.4848	1.01484e-25
rs1238015	4	99359977	C	T	0.411233	0.023323	0.00220072	10.5979	3.04841e-26
rs1235415	4	99360002	A	G	0.332709	0.02451	0.00229816	10.665	1.48329e-26
rs283405	4	99360006	G	A	0.975854	0.0621462	0.00706303	8.7988	1.38282e-18
rs3098807	4	99360054	G	A	0.975937	0.0621176	0.00707489	8.78001	1.63465e-18
rs1229860	4	99360070	T	C	0.214858	0.0157706	0.00263573	5.9834	2.18527e-09
rs1229859	4	99360165	A	G	0.214945	0.0157523	0.00263534	5.97732	2.26839e-09
rs111405931	4	99360237	A	C	0.291371	-0.0242306	0.0023843	-10.1626	2.91335e-24
rs62307323	4	99361104	T	C	0.116994	0.0259383	0.00337389	7.68795	1.49506e-14
rs147851155	4	99361105	A	G	0.239493	-0.0272766	0.00253947	-10.7411	6.52829e-27
rs1229853	4	99362010	A	G	0.214822	0.01575	0.00263588	5.97524	2.29754e-09
rs56109716	4	99363641	G	A	0.327496	0.0177613	0.0023107	7.68654	1.51162e-14
rs1154434	4	99363855	A	G	0.214967	0.0157436	0.00263523	5.97425	2.31145e-09
rs1154436	4	99364194	A	G	0.215061	0.015764	0.00263479	5.98301	2.19047e-09
rs2165670	4	99364928	A	G	0.116914	0.026032	0.00337489	7.71344	1.22473e-14
rs1154441	4	99365479	T	G	0.215002	0.0156998	0.00263508	5.95801	2.55325e-09
rs62305761	4	99365537	A	G	0.11689	0.0260563	0.00337519	7.71996	1.16364e-14
rs62305762	4	99366090	C	T	0.327421	0.0178585	0.00231084	7.72817	1.09102e-14
rs1583973	4	99366726	T	C	0.116853	0.0261038	0.00337565	7.73296	1.05076e-14
rs1154443	4	99366870	C	T	0.336699	0.0136698	0.00229072	5.96746	2.40973e-09
rs1154446	4	99367790	A	C	0.215136	0.0157022	0.00263454	5.96014	2.52024e-09
rs62305763	4	99368248	T	C	0.117162	0.02632	0.00337179	7.80594	5.90606e-15
rs62305764	4	99368735	G	T	0.327378	0.0179857	0.00231092	7.78294	7.08582e-15
rs1837934	4	99368827	A	C	0.239366	-0.0273125	0.00253993	-10.7533	5.72087e-27
rs1302810	4	99368859	G	A	0.336748	0.0136392	0.00229064	5.95431	2.61171e-09
rs72681920	4	99369122	A	C	0.239359	-0.0272964	0.00253996	-10.7468	6.13566e-27
rs1302809	4	99369139	A	G	0.230416	0.0183448	0.00257204	7.13239	9.86409e-13
rs12505678	4	99379308	C	T	0.387478	-0.0170547	0.00222265	-7.67311	1.67878e-14
rs12501721	4	99379393	A	C	0.196043	-0.0211413	0.0027275	-7.75114	9.10694e-15
rs72681931	4	99380493	C	T	0.387408	-0.0170805	0.00222273	-7.68448	1.53614e-14
rs2584456	4	99381861	A	G	0.609578	0.0168894	0.00221944	7.60973	2.74665e-14
rs971074	4	99420704	T	C	0.11362	-0.0210759	0.00341174	-6.17746	6.51414e-10
rs111540153	4	99421462	A	G	0.114354	-0.0208865	0.00340259	-6.1384	8.33543e-10
rs111558838	4	99427526	C	T	0.277802	-0.0295281	0.00241863	-12.2086	2.79626e-34
rs75076500	4	99428047	C	A	0.277788	-0.0295428	0.00241867	-12.2145	2.60169e-34
rs112941647	4	99430290	C	T	0.277694	-0.0293051	0.00241896	-12.1147	8.82414e-34
rs113954211	4	99430960	A	C	0.071971	-0.0432295	0.00419111	-10.3146	6.05478e-25
rs34925826	4	99435427	G	A	0.277823	-0.0294828	0.00241859	-12.1901	3.51197e-34
rs80249729	4	99438351	A	G	0.0528548	-0.059103	0.00484199	-12.2063	2.87575e-34
rs78139295	4	99438939	G	A	0.277859	-0.0295169	0.00241853	-12.2045	2.94159e-34
rs17589306	4	99447629	C	T	0.283344	-0.0245733	0.00240455	-10.2195	1.62174e-24
rs2119889	4	99451674	T	G	0.0526082	-0.0589075	0.00485329	-12.1377	6.67108e-34
rs2165672	4	99451819	C	A	0.283343	-0.024562	0.00240454	-10.2148	1.70149e-24
rs75505416	4	99452677	C	T	0.283352	-0.0245515	0.00240452	-10.2106	1.77835e-24
rs76571809	4	99455179	A	C	0.0526149	-0.0589047	0.00485299	-12.1378	6.65948e-34
rs113685321	4	99457910	C	T	0.283376	-0.0245169	0.00240446	-10.1964	2.05687e-24
rs77324539	4	99462539	G	A	0.295982	-0.024553	0.00237443	-10.3406	4.61767e-25
rs78369570	4	99463667	A	G	0.0518427	-0.0594495	0.00488787	-12.1627	4.91317e-34
rs115163375	4	99465672	T	C	0.0588363	-0.0475944	0.00460606	-10.333	4.9966e-25
rs72905000	4	99471487	A	G	0.102381	-0.0253129	0.0035748	-7.08091	1.43212e-12
rs148915469	4	99474257	C	A	0.271178	-0.0387721	0.00243632	-15.9142	5.04873e-57
rs146022132	4	99478486	C	T	0.271166	-0.038761	0.00243635	-15.9095	5.44875e-57
rs1442483	4	99478588	T	C	0.0598175	-0.0469284	0.00457082	-10.2669	9.92954e-25
rs12645746	4	99484024	T	C	0.105433	-0.0272436	0.00353123	-7.71504	1.20942e-14
rs111986524	4	99486375	A	G	0.0468258	-0.0642292	0.00512768	-12.526	5.38241e-36
rs111501847	4	99486407	T	G	0.0269656	-0.106708	0.00668617	-15.9594	2.44943e-57
rs1969097	4	99487037	C	A	0.275318	-0.0306454	0.00242526	-12.6359	1.33805e-36
rs111466094	4	99487817	T	C	0.0272853	-0.105604	0.00664837	-15.8842	8.15814e-57
rs114719272	4	99488110	G	A	0.27532	-0.0301096	0.00242533	-12.4146	2.17685e-35
rs7677546	4	99489490	C	T	0.320537	-0.0141	0.00232366	-6.06803	1.29491e-09
rs116245649	4	99490219	T	C	0.0465985	-0.0649247	0.00513963	-12.6322	1.40313e-36
rs115337753	4	99491163	C	A	0.275285	-0.030668	0.00242535	-12.6448	1.19575e-36
rs181163639	4	99493168	C	A	0.270898	-0.0389843	0.00243697	-15.9971	1.33909e-57
rs184626578	4	99493170	G	A	0.270822	-0.0389858	0.00243718	-15.9963	1.35694e-57
rs188895182	4	99493172	G	A	0.270898	-0.038985	0.00243697	-15.9974	1.33324e-57
rs150918939	4	99493408	T	G	0.0269669	-0.106637	0.00668601	-15.9493	2.87968e-57
rs150052475	4	99493743	C	A	0.271217	-0.0388538	0.00243607	-15.9494	2.87613e-57
rs190653003	4	99493872	A	G	0.0269669	-0.106637	0.00668602	-15.9493	2.88026e-57
rs146748718	4	99494080	T	C	0.0269639	-0.10662	0.00668638	-15.9459	3.04097e-57
rs116040762	4	99494278	G	A	0.275324	-0.030087	0.00242532	-12.4054	2.44288e-35
rs143722705	4	99494326	G	A	0.271216	-0.0388562	0.00243607	-15.9504	2.83218e-57
rs111452034	4	99494578	T	C	0.10553	-0.0264872	0.00352973	-7.50402	6.18888e-14
rs141891093	4	99494944	T	C	0.105529	-0.0264834	0.00352975	-7.50292	6.24119e-14
rs149476309	4	99495099	A	G	0.0269653	-0.106643	0.00668621	-15.9497	2.86482e-57
rs112165841	4	99495179	A	G	0.0933388	-0.024855	0.00372575	-6.67114	2.53817e-11
rs191677672	4	99496950	C	T	0.275292	-0.0305985	0.00242533	-12.6162	1.71885e-36
rs145234718	4	99497196	C	T	0.270367	-0.0382355	0.00243854	-15.6796	2.0845e-55
rs111741780	4	99498387	A	G	0.0466325	-0.0646001	0.00513778	-12.5735	2.95202e-36
rs111569429	4	99498582	C	T	0.271214	-0.0388583	0.00243607	-15.9512	2.79523e-57
rs78111280	4	99500665	T	C	0.105493	-0.0264528	0.00353027	-7.49313	6.72492e-14
rs112551978	4	99501688	G	A	0.274879	-0.0299992	0.00242692	-12.361	4.2479e-35
rs1553432	4	99502293	G	A	0.276342	-0.0301259	0.00242293	-12.4337	1.71504e-35
rs1553433	4	99502483	A	G	0.0284684	-0.101436	0.00651256	-15.5755	1.06812e-54
rs79623823	4	99503048	T	C	0.0482737	-0.0629107	0.00505491	-12.4455	1.47998e-35
rs113668215	4	99505912	A	C	0.0281906	-0.101544	0.00654363	-15.518	2.62075e-54
rs112700143	4	99506234	G	A	0.276307	-0.0301842	0.00242299	-12.4574	1.27426e-35
rs76156384	4	99506950	A	G	0.0599304	-0.0484118	0.00456615	-10.6023	2.90673e-26
rs111510363	4	99506997	G	T	0.272468	-0.0379119	0.00243264	-15.5847	9.25647e-55
rs76478971	4	99507785	G	A	0.276368	-0.0301397	0.00242282	-12.4399	1.58658e-35
rs77471916	4	99508362	A	G	0.0481651	-0.063362	0.00506031	-12.5214	5.70458e-36
rs113902949	4	99508924	A	G	0.0481302	-0.0628143	0.00506205	-12.4089	2.33948e-35
rs72906745	4	99509086	T	C	0.0599245	-0.0484373	0.00456636	-10.6074	2.75212e-26
rs112531168	4	99509272	G	A	0.272469	-0.0379081	0.00243264	-15.5831	9.47807e-55
rs72906751	4	99509561	C	T	0.281957	-0.0257776	0.0024087	-10.7019	9.97404e-27
rs75670102	4	99509773	C	T	0.282074	-0.0255416	0.00240842	-10.6051	2.82075e-26
rs78908724	4	99510009	C	T	0.272462	-0.0378997	0.00243266	-15.5796	1.00221e-54
rs72906756	4	99510190	C	T	0.282068	-0.0255876	0.00240844	-10.6242	2.30078e-26
rs112790221	4	99511426	C	T	0.272466	-0.0379515	0.00243265	-15.6009	7.17684e-55
rs75674620	4	99512327	A	G	0.0482659	-0.0629203	0.00505529	-12.4464	1.46234e-35
rs78510748	4	99512579	C	A	0.276366	-0.0301554	0.00242283	-12.4464	1.46384e-35
rs112430106	4	99514202	G	A	0.272471	-0.0379217	0.00243263	-15.5888	8.68134e-55
rs1847370	4	99514669	A	G	0.0608904	-0.0489525	0.00453256	-10.8002	3.43517e-27
rs1847371	4	99514894	C	T	0.28295	-0.0259938	0.00240628	-10.8025	3.35053e-27
rs1847372	4	99514910	T	C	0.0608919	-0.0489539	0.00453251	-10.8006	3.41855e-27
rs72906763	4	99515887	C	T	0.281815	-0.0257297	0.00240908	-10.6803	1.25883e-26
rs72906765	4	99516644	G	A	0.281788	-0.0257211	0.00240915	-10.6764	1.31268e-26
rs112102006	4	99516730	A	G	0.0284595	-0.10185	0.00651354	-15.6367	4.09421e-55
rs78911191	4	99518757	A	G	0.0284514	-0.102346	0.00651451	-15.7105	1.28207e-55
rs112303289	4	99520649	G	A	0.272475	-0.0382001	0.00243262	-15.7033	1.43633e-55
rs1354368	4	99520729	G	A	0.682714	0.0129943	0.00232915	5.579	2.41904e-08
rs112724250	4	99521914	A	G	0.0284823	-0.102245	0.00651102	-15.7033	1.43479e-55
rs111939282	4	99523681	C	T	0.271429	-0.0369002	0.0024358	-15.1491	7.67774e-52
rs72906779	4	99523906	C	T	0.269195	-0.0360888	0.00244235	-14.7763	2.08383e-49
rs112114454	4	99526076	T	C	0.0269818	-0.11069	0.0066846	-16.559	1.37865e-61
rs41275703	4	99529800	G	A	0.271313	-0.0400917	0.00243602	-16.4579	7.36511e-61
rs112352710	4	99530238	T	C	0.0273359	-0.108006	0.00664266	-16.2594	1.91682e-59
rs188726265	4	99530624	T	C	0.0194989	-0.143045	0.00783179	-18.2647	1.58142e-74
rs111307169	4	99535845	C	T	0.271315	-0.0399233	0.00243608	-16.3883	2.31786e-60
rs112527495	4	99537616	G	A	0.271308	-0.0398978	0.0024361	-16.3777	2.75792e-60
rs41275705	4	99539374	G	A	0.271306	-0.0398756	0.0024361	-16.3686	3.20476e-60
rs145014024	4	99539681	C	T	0.271089	-0.0397592	0.00243671	-16.3168	7.49972e-60
rs113019310	4	99543447	T	C	0.0268139	-0.11031	0.00670531	-16.4511	8.2384e-61
rs543669349	4	99544416	G	T	0.265447	-0.0447088	0.00245249	-18.23	2.98494e-74
rs112954724	4	99550033	G	T	0.271295	-0.0398365	0.00243612	-16.3524	4.18093e-60
rs147825380	4	99553022	C	A	0.26535	-0.0446914	0.00245279	-18.2206	3.54021e-74
rs111694387	4	99553183	G	T	0.271294	-0.0398258	0.00243613	-16.348	4.49489e-60
rs112576392	4	99554417	G	A	0.271281	-0.0398176	0.00243616	-16.3444	4.7705e-60
rs191253898	4	99562114	C	T	0.271275	-0.0397939	0.00243618	-16.3346	5.60284e-60
rs7682548	4	99563133	C	T	0.342655	-0.0131344	0.00228463	-5.749	8.97711e-09
rs10026790	4	99563386	A	G	0.20249	-0.0155008	0.00269819	-5.74488	9.19847e-09
rs11944752	4	99564098	A	G	0.202343	-0.0155494	0.00269895	-5.76127	8.34835e-09
rs7687762	4	99565322	T	C	0.202111	-0.0154569	0.00270007	-5.72462	1.03664e-08
rs28473262	4	99566106	G	A	0.342548	-0.0131088	0.0022848	-5.73739	9.61456e-09
rs28431971	4	99566158	A	G	0.202741	-0.0154095	0.00269695	-5.71368	1.10558e-08
rs28497720	4	99566213	T	C	0.20246	-0.0154902	0.00269833	-5.74065	9.4316e-09
rs113034137	4	99566431	A	G	0.0267778	-0.109241	0.00670941	-16.2818	1.32806e-59
rs11943031	4	99568047	A	G	0.202584	-0.0154692	0.00269775	-5.73413	9.80118e-09
rs11933937	4	99568081	G	A	0.342528	-0.0130916	0.00228486	-5.72973	1.00591e-08
rs111787230	4	99568373	G	A	0.271359	-0.0395537	0.00243584	-16.2383	2.70518e-59
rs28849180	4	99568838	T	C	0.202489	-0.0155116	0.00269819	-5.74889	8.9833e-09
rs1503778	4	99569531	A	G	0.201858	-0.0149735	0.00270135	-5.54297	2.97386e-08
rs11933250	4	99570352	C	T	0.342238	-0.0128501	0.0022853	-5.62291	1.87764e-08
rs11946658	4	99570523	A	C	0.202515	-0.0155931	0.00269807	-5.77936	7.49844e-09
rs11933520	4	99571032	C	T	0.342622	-0.0131696	0.00228468	-5.76432	8.19894e-09
rs6839296	4	99571660	A	G	0.202278	-0.0155044	0.00269924	-5.744	9.24673e-09
rs1800591	4	99574331	T	G	0.20243	-0.0155668	0.00269848	-5.76872	7.9875e-09
rs1800804	4	99574660	C	T	0.342626	-0.0131706	0.00228468	-5.76474	8.17822e-09
rs11937273	4	99575906	C	A	0.342587	-0.0131471	0.00228474	-5.75432	8.69895e-09
rs28666735	4	99576030	C	T	0.342468	-0.0131101	0.00228493	-5.73765	9.59969e-09
rs11947558	4	99576421	T	C	0.202455	-0.0155772	0.00269836	-5.77285	7.79419e-09
rs28435607	4	99578179	C	A	0.342645	-0.0132231	0.00228465	-5.7878	7.13141e-09
rs76006141	4	99578396	C	T	0.271252	-0.0396411	0.00243614	-16.2721	1.55733e-59
rs28376611	4	99578816	A	G	0.202452	-0.0155754	0.00269837	-5.77213	7.8274e-09
rs7693203	4	99578973	T	C	0.20244	-0.0155777	0.00269843	-5.77285	7.79397e-09
rs28647519	4	99579618	T	C	0.214479	-0.0153275	0.00264118	-5.80328	6.50307e-09
rs6841211	4	99580533	C	T	0.330214	-0.0134641	0.00230517	-5.84082	5.19433e-09
rs28595160	4	99581665	T	G	0.214494	-0.0152778	0.00264111	-5.78461	7.26795e-09
rs11937107	4	99582604	T	C	0.214427	-0.0153429	0.00264139	-5.80863	6.2985e-09
rs3816873	4	99583507	C	T	0.330797	-0.013312	0.0023039	-5.77804	7.55775e-09
rs151253743	4	99583751	A	G	0.0268659	-0.108892	0.00669845	-16.2562	2.01763e-59
rs1057615	4	99583980	G	A	0.331074	-0.0132706	0.00230328	-5.7616	8.3321e-09
rs113287401	4	99585111	G	A	0.271228	-0.0395663	0.00243612	-16.2415	2.56507e-59
rs113557405	4	99591692	C	T	0.271058	-0.0398367	0.00243625	-16.3517	4.23331e-60
rs144319557	4	99592389	A	G	0.0266383	-0.10961	0.00672526	-16.2983	1.01524e-59
rs148766065	4	99592895	T	C	0.0270342	-0.109437	0.00667701	-16.3901	2.24991e-60
rs150849944	4	99593207	T	C	0.0270203	-0.109557	0.00667867	-16.404	1.78989e-60
rs2130907	4	99595501	A	C	0.0270316	-0.109433	0.00667732	-16.3888	2.29971e-60
rs77290806	4	99597557	G	T	0.271082	-0.0399265	0.00243611	-16.3894	2.27557e-60
rs2035813	4	99599453	G	A	0.271032	-0.0399897	0.00243615	-16.4151	1.49042e-60
rs145855658	4	99602646	A	G	0.0270217	-0.109495	0.00667821	-16.3959	2.04528e-60
rs112125838	4	99606671	T	C	0.0274332	-0.107608	0.00662742	-16.2368	2.7679e-59
rs113005789	4	99607794	T	C	0.0274334	-0.107611	0.00662739	-16.2373	2.74727e-59
rs111536591	4	99609390	G	A	0.270684	-0.0395622	0.00243643	-16.2378	2.72425e-59
rs112568939	4	99611276	T	C	0.0274336	-0.107621	0.00662737	-16.2389	2.67705e-59
rs113337987	4	99611445	A	G	0.0274403	-0.10761	0.00662658	-16.2392	2.66434e-59
rs78189095	4	99612502	T	C	0.0274327	-0.107615	0.00662747	-16.2377	2.72876e-59
rs79149824	4	99613653	T	C	0.0274307	-0.107597	0.00662771	-16.2344	2.8813e-59
rs112205302	4	99615675	A	G	0.027378	-0.107447	0.00663391	-16.1967	5.3247e-59
rs113880206	4	99617674	G	A	0.270746	-0.0395101	0.00243638	-16.2167	3.84363e-59
rs112925005	4	99624384	T	G	0.0272308	-0.107719	0.0066521	-16.1932	5.6293e-59
rs151094957	4	99625109	T	G	0.0272469	-0.107536	0.00665018	-16.1704	8.15538e-59
rs113433747	4	99630486	G	A	0.270773	-0.0393012	0.00243646	-16.1304	1.55919e-58
rs80147669	4	99633873	A	G	0.0268682	-0.107174	0.00669558	-16.0066	1.14875e-57
rs79121650	4	99643519	A	G	0.0269041	-0.107508	0.00669237	-16.0642	4.54545e-58
rs149603825	4	99644472	A	C	0.0269034	-0.107516	0.00669245	-16.0652	4.47218e-58
rs113499158	4	99644882	G	A	0.270092	-0.0386046	0.0024388	-15.8293	1.9536e-56
rs111811898	4	99647203	A	G	0.0268914	-0.10737	0.0066939	-16.0399	6.72162e-58
rs80251526	4	99648285	C	T	0.270888	-0.0390756	0.00243655	-16.0373	7.01619e-58
rs113046406	4	99649120	G	A	0.270886	-0.0390668	0.00243655	-16.0337	7.43637e-58
rs113550862	4	99653659	C	T	0.270941	-0.0388795	0.00243641	-15.9577	2.51924e-57
rs112144150	4	99654986	A	G	0.0269639	-0.106486	0.00668551	-15.9279	4.05718e-57
rs113836829	4	99656044	T	C	0.0268382	-0.106724	0.00670035	-15.9281	4.04213e-57
rs72908758	4	99657218	T	G	0.0387076	-0.0793266	0.0056161	-14.1249	2.66955e-45
rs72908762	4	99659504	G	T	0.268667	-0.0345033	0.00244416	-14.1166	3.00135e-45
rs113795436	4	99662307	T	C	0.0267585	-0.106549	0.00671004	-15.879	8.85485e-57
rs112673132	4	99665014	A	G	0.0267255	-0.106551	0.00671407	-15.8698	1.0257e-56
rs148960385	4	99667670	A	G	0.0193973	-0.140808	0.00785079	-17.9355	6.22716e-72
rs112416204	4	99672384	A	G	0.0269162	-0.106047	0.00669124	-15.8486	1.43761e-56
rs112771525	4	99675136	G	A	0.270715	-0.0386426	0.00243703	-15.8564	1.26926e-56
rs72910622	4	99683747	C	A	0.26888	-0.0333665	0.00244384	-13.6533	1.9284e-42
rs113142007	4	99684812	C	T	0.270748	-0.038597	0.00243718	-15.8368	1.73553e-56
rs6532827	4	99686476	T	G	0.0845619	-0.0322331	0.00389742	-8.27036	1.33551e-16
rs150848708	4	99687642	A	G	0.0193234	-0.140992	0.00786481	-17.927	7.26525e-72
rs113136904	4	99689875	A	G	0.0265898	-0.10653	0.00673137	-15.8259	2.06308e-56
rs112626323	4	99693120	T	C	0.0265861	-0.106516	0.00673183	-15.8228	2.16652e-56
rs112790183	4	99693552	A	G	0.0265495	-0.106532	0.00673634	-15.8146	2.46895e-56
rs112966321	4	99699898	G	T	0.270728	-0.0385412	0.00243724	-15.8135	2.51133e-56
rs145117377	4	99701120	G	A	0.270637	-0.0386233	0.0024375	-15.8455	1.51083e-56
rs113952744	4	99715592	C	T	0.270713	-0.0384289	0.00243708	-15.7684	5.13296e-56
rs79548024	4	99717456	A	G	0.026558	-0.106084	0.00673472	-15.7517	6.6812e-56
rs72684316	4	99745593	C	A	0.314721	-0.0166419	0.00233273	-7.13408	9.74379e-13
rs72684365	4	99894958	A	G	0.0484551	-0.0421098	0.00504448	-8.3477	6.96038e-17
rs140280172	4	99911407	A	C	0.0157141	-0.13077	0.00870624	-15.0203	5.40812e-51
rs150208378	4	99929131	T	C	0.0157895	-0.129204	0.00868578	-14.8754	4.7612e-50
rs77855620	4	99963917	C	T	0.272986	-0.0215659	0.00242991	-8.87517	6.98252e-19
rs148382129	4	99963963	T	C	0.0161917	-0.128689	0.00857882	-15.0008	7.25767e-51
rs150021439	4	99998097	T	C	0.0153517	-0.129493	0.00880678	-14.7038	6.09113e-49
rs76216399	4	100017158	G	A	0.272055	-0.0225724	0.00243291	-9.27791	1.72827e-20
rs182789399	4	100156931	T	C	0.0124953	-0.132218	0.00975113	-13.5593	6.98226e-42
rs149580409	4	100157089	C	T	0.260211	-0.0334459	0.00246878	-13.5475	8.19249e-42
rs72688346	4	100220776	A	G	0.0353986	-0.033356	0.0058636	-5.68865	1.28047e-08
rs551109960	4	100224232	G	T	0.267871	-0.0133656	0.00244634	-5.46352	4.66775e-08
rs58143459	4	100302156	C	T	0.302471	-0.0128764	0.00235731	-5.46235	4.69875e-08
rs72690320	4	100309767	G	A	0.297679	-0.0155751	0.00236898	-6.57461	4.87798e-11
rs72690321	4	100310252	A	G	0.126476	-0.0217855	0.00325876	-6.6852	2.30605e-11
rs72690323	4	100311165	T	C	0.141368	-0.0183009	0.00310967	-5.88515	3.97692e-09
rs4076280	4	100312658	A	G	0.12897	-0.0191551	0.0032308	-5.92891	3.04956e-09
rs72690326	4	100314304	A	C	0.123949	-0.020599	0.00328692	-6.26696	3.68153e-10
rs72690327	4	100314362	A	G	0.124059	-0.0208457	0.00328435	-6.34698	2.19576e-10
rs72690328	4	100315420	G	A	0.295753	-0.014864	0.00237216	-6.26604	3.70353e-10
rs148926542	4	100386039	G	A	0.256716	-0.0207867	0.00247956	-8.38323	5.14948e-17
rs144291162	4	100411876	T	C	0.00799926	-0.103448	0.0121546	-8.51103	1.724e-17
rs192703884	4	100561867	T	C	0.00710519	-0.0984874	0.0128898	-7.64075	2.15954e-14
rs186613142	4	100625352	A	G	0.00809075	-0.0857008	0.012085	-7.09149	1.32672e-12
rs187466945	4	100673206	C	T	0.255526	-0.0169295	0.00248335	-6.81722	9.28162e-12
rs149740532	4	100701236	G	A	0.254497	-0.01767	0.00248548	-7.10929	1.16645e-12
rs147035170	4	100812742	G	T	0.254085	-0.0165336	0.00248679	-6.64859	2.95907e-11
rs4702846	5	12037695	C	T	0.423939	-0.0123349	0.00219391	-5.62235	1.88373e-08
rs62337990	5	12038590	T	C	0.378613	-0.0130417	0.0022356	-5.83363	5.42348e-09
rs59324947	5	12041469	G	A	0.408625	-0.0126144	0.00220577	-5.7188	1.07278e-08
rs62337992	5	12043021	C	T	0.430609	-0.0121573	0.00218989	-5.55155	2.83154e-08
rs4130838	5	12045860	T	C	0.378103	-0.0128206	0.00223617	-5.73329	9.85016e-09
rs4348212	5	12046767	C	T	0.430911	-0.0120407	0.0021897	-5.49878	3.82424e-08
rs62337993	5	12047836	G	A	0.445003	-0.0119255	0.00217873	-5.4736	4.4099e-08
rs4702847	5	12048661	A	G	0.366019	-0.0126481	0.00224828	-5.62567	1.84793e-08
rs56002705	5	12049873	A	G	0.360465	-0.012875	0.00225555	-5.70815	1.14213e-08
rs7700820	5	12050736	C	A	0.42298	-0.012419	0.0021921	-5.66535	1.46728e-08
rs62337994	5	12054910	C	T	0.422405	-0.0122443	0.00219257	-5.58444	2.3446e-08
rs62337999	5	12058817	G	A	0.423281	-0.012672	0.00219244	-5.77984	7.47739e-09
rs10462686	5	12063108	C	T	0.422905	-0.0124736	0.00219198	-5.69054	1.26636e-08
rs10462687	5	12063411	T	C	0.39308	-0.0123154	0.00221644	-5.55637	2.75436e-08
rs62338003	5	12064877	T	C	0.368262	-0.0127954	0.00224513	-5.69919	1.20378e-08
rs62338020	5	12068340	T	G	0.369126	-0.0130163	0.00224593	-5.79551	6.81152e-09
rs4355525	5	12079643	A	C	0.391665	-0.0124678	0.00221933	-5.61781	1.9339e-08
rs10065698	5	12080851	A	C	0.36791	-0.013161	0.00224703	-5.85706	4.71139e-09
rs4277917	5	12084744	A	C	0.413662	-0.0124137	0.00220043	-5.64151	1.68565e-08
rs4413531	5	12085192	G	A	0.455639	-0.0122244	0.00217639	-5.61686	1.94464e-08
rs7445243	5	12086748	C	T	0.445532	-0.0122369	0.00217973	-5.61395	1.97756e-08
rs10054180	5	12094920	A	G	0.379205	-0.0129338	0.00223396	-5.78966	7.05307e-09
rs4555799	5	12105360	C	T	0.40758	-0.0123904	0.002206	-5.6167	1.94637e-08
rs6861988	5	12106057	A	G	0.378908	-0.0128255	0.00223493	-5.73867	9.54237e-09
rs56119111	5	12107197	C	T	0.411671	-0.0128494	0.00220339	-5.83166	5.48801e-09
rs6875403	5	12109883	C	T	0.415062	-0.0126887	0.00220039	-5.76656	8.09065e-09
rs6870511	5	12112423	T	G	0.379323	-0.0123364	0.00223381	-5.52261	3.33991e-08
rs17209972	5	12116861	T	C	0.379561	-0.0123159	0.00223345	-5.5143	3.50168e-08
rs2968107	5	12123401	C	T	0.411042	-0.012306	0.00220332	-5.5852	2.33438e-08
rs250766	5	12127194	C	T	0.410881	-0.0122836	0.00220287	-5.57616	2.45885e-08
rs32327	5	12136186	G	A	0.410714	-0.0123562	0.00220273	-5.6095	2.02909e-08
rs32328	5	12136353	T	G	0.381232	-0.0124636	0.00223111	-5.58628	2.31989e-08
rs32330	5	12138357	G	T	0.411459	-0.0123651	0.00220205	-5.61527	1.96251e-08
rs1079876	5	12144372	T	C	0.380106	-0.0125439	0.00223233	-5.61919	1.91855e-08
rs250783	5	12151536	A	G	0.381023	-0.0122391	0.00223136	-5.48504	4.13375e-08
rs250782	5	12152330	T	C	0.381076	-0.012213	0.0022313	-5.47347	4.41303e-08
rs250781	5	12152787	C	T	0.4108	-0.0122073	0.00220264	-5.54214	2.98804e-08
rs193944	5	12155706	C	T	0.411713	-0.0121026	0.00220187	-5.49649	3.87422e-08
rs250775	5	12158351	A	C	0.381958	-0.0122444	0.0022292	-5.49273	3.95777e-08
rs32286	5	12177648	T	C	0.5836	0.0121243	0.00219965	5.51193	3.54912e-08
rs969805	5	12179314	A	G	0.58953	0.0121312	0.00220336	5.50575	3.67608e-08
rs2907278	5	12182011	T	G	0.572747	0.0120039	0.00218835	5.48535	4.12657e-08
rs17321515	8	125474167	G	A	0.436136	0.0120028	0.00218306	5.49816	3.83785e-08
rs2980868	8	125475993	T	C	0.426944	0.0120791	0.00219072	5.51374	3.51282e-08
rs2980869	8	125476008	T	C	0.426909	0.0120739	0.00219075	5.51132	3.56162e-08
Note:
rsID: NCBI SNP database identifier
CHR
POS: Physical position of the SNP in build GRCh38
EA
NEA
EAF
BETA
SE
Z
P

## Sheet: ST7
Supplementary Table 7. Conditional independent variants in the MTAG meta-analysis
Chr	SNP	bp	Gene	refA	freq	b	se	p	n	freq_geno	bJ	bJ_se	pJ	LD_r
2	rs1260326	27730940	GCKR	C	0.646778	0.0172443	0.00226589	2.7324e-14	440997	0.638329	0.0172443	0.00226604	2.7428e-14	0
3	rs2167046	85586806	CADM2	A	0.575474	-0.0155237	0.00219118	1.3941e-12	440740	0.586455	-0.0155237	0.0021913	1.39809e-12	0
4	rs13135439	39405151	KLB	G	0.445968	0.0144481	0.00217948	3.37624e-11	441083	0.43804	0.0144481	0.00217959	3.38363e-11	0
4	rs1229984	100239319	ADH1B	C	0.941695	0.138218	0.00462046	1.27919e-196	440502	0.942363	0.144369	0.00476681	1.73378e-201	0.0504617
4	rs1662048	100272032	ADH1C	C	0.411473	0.0237146	0.00220021	4.35742e-27	441228	0.272334	0.0213639	0.00220678	3.63155e-22	0
5	rs10065698	12080963		A	0.36791	-0.013161	0.00224703	4.71139e-09	440985	0.354467	-0.013161	0.00224711	4.71766e-09	0
8	rs2980868	126488235	TRIB1AL	T	0.426944	0.0120791	0.00219072	3.51282e-08	440962	0.466859	0.0120791	0.0021908	3.51649e-08	0
Note:
Chr: Chromosome number
SNP: NCBI SNP database identifier
bp: Physical position of the SNP in build GRCh37
Gene: The gene in which the SNP is located
refA: The effect allele
freq: The frequency of the effect allele in the original data
b: Beta coefficient of the meta-analysis
se: Standard error of the beta coefficient
p: P value of the meta-analysis
n: Estimated effective sample size of the meta-analysis
freq_geno: The frequency of the effect allele in the reference data
bJ: Beta coefficient for the joint effect
bJ_se: Standard error of the joint effect
pJ: P value for the joint effect.
LD_r: Linkage disequilibrium (LD) between the SNP i and SNP i + 1 for the SNPs on the list

## Sheet: ST8
Supplementary Table 8. Aditional genome-wide significant variants identified in the MTAG meta-analysis but not in the METAL
rsID	Chr	bp	Overlapped or Nearest Genes	Consequence
rs2163972	3	85355810	CADM2	Intronic
rs13094105	3	85363387	CADM2	Intronic
rs1503778	4	99569531	MTTP	Intronic
rs72688346	4	100220776
rs551109960	4	100224232
rs62337993	5	12047836	CTNND2
rs17209972	5	12116861	CTNND2
rs250783	5	12151536	CTNND2
rs250782	5	12152330	CTNND2
rs250781	5	12152787	CTNND2
rs193944	5	12155706	CTNND2
rs32286	5	12177648	CTNND2
rs969805	5	12179314	CTNND2
rs2907278	5	12182011	CTNND2
Note:
rsID: NCBI SNP database identifier
Chr: Chromosome number
bp: Physical position of the SNP in build GRCh38

## Sheet: ST9
Supplementary Table 9. Ancestry-specific allelic frequency of the independent variants that pass our strict quality filtering
rsID	REF	ALT	Freq AFR	FreqSE AFR	Freq AMR	FreqSE AMR	Freq EUR	FreqSE EUR	MAF AFR	MAF AMR	MAF EUR	MA
rs34431249	A	T	0.8323	0.0344	0.8191	0.0376	0.7616	0.0206	0.1677	0.1809	0.2384	A
rs1260326	T	C	0.9255	0.0236	0.8086	0.0606	0.5333	0.0309	0.0745	0.1914	0.4667	T
rs73137382	C	G	0.0381	0.0217	0.1798	0.0456	0.2174	0.0173	0.0381	0.1798	0.2174	G
rs1789896	A	G	0.1829	0.0259	0.3505	0.0785	0.378	0.0243	0.1829	0.3505	0.378	G
rs10065698	A	C	0.8804	0.0159	0.6871	0.0671	0.5741	0.0372	0.1196	0.3129	0.4259	A
rs10736856	T	C	0.1527	0.0127	0.2381	0.0417	0.3204	0.0107	0.1527	0.2381	0.3204	C
Note: Variants were filtered for MAF > 0.001 and imputation INFO > 0.9.
rsID: NCBI SNP database identifier
REF: reference allele
ALT: Alternative allele
Freq AFR: frequency of the alternative allele in those with African-like segments
FreqSE AFR: standard error of the AFR-like allelic frequency
Freq AMR: frequency of the alternative allele in those with Admixed American-like segments
FreqSE AMR: standard error of the AMR-like allelic frequency
Freq EUR: frequency of the alternative allele in those with European-like segments
FreqSE EUR: standard error of the EUR-like allelic frequency
MAF AFR: minor allelic frequency in those with African-like segments
MAF AMR: minor allelic frequency in those with Admixed American-like segments
MAF EUR: minor allelic frequency in those with European-like segments
MA: minor allele

[truncated: 20 more sheets: ST10, ST11, ST12, ST13, ST14, ST15, ST16, ST17, ST18, ST19, ST20, ST21, ST22, ST23, ST24, ST25, ST26, ST27, ST28, ST29]
